# Supplementary material for: Comparison of Proteomic Responses as Global Approach to Antibiotic Mechanism of Action Elucidation
Source: PubMed Central journal article supplement (PMC7927858; doi:10.1128/aac.01373-20), 2020-12-16
Supplement: AAC.01373-20-s0001.pdf [file AAC.01373-20-s0001.pdf]

## **Supplementary Information**

### **Comparison of proteomic responses as global approach to antibiotic mechanism of action elucidation**

Christoph H. R. Senges<sup>1</sup>, Jennifer J. Stepanek<sup>1</sup>, Michaela Wenzel<sup>1,2</sup>, Nadja Raatschen<sup>1</sup>, Ümran Ay<sup>1</sup>, Yvonne Märten<sup>1</sup>, Pascal Prochnow<sup>1</sup>, Melissa Vázquez Hernández<sup>1</sup>, Abdulkadir Yayci<sup>1</sup>, Britta Schubert<sup>1</sup>, Niklas B. M. Janzing<sup>1</sup>, Helen L. Warmuth<sup>1</sup>, Martin Kozik<sup>1</sup>, Jens Bongard<sup>1</sup>, John N. Alumasa<sup>3</sup>, Bauke Albada<sup>4,5</sup>, Maya Penkova<sup>4</sup>, Tadeja Lukežič<sup>6,7</sup>, Nohemy A. Sorto<sup>8</sup>, Nicole Lorenz<sup>4</sup>, Reece Miller<sup>4</sup>, Bingyao Zhu<sup>9</sup>, Martin Benda<sup>9</sup>, Jörg Stülke<sup>9</sup>, Sina Schäkermann<sup>1</sup>, Lars I. Leichert<sup>10</sup>, Kathi Scheinpflug<sup>11,12</sup>, Heike Brötz-Oesterhelt<sup>13</sup>, Christian Hertweck<sup>14</sup>, Jared T. Shaw<sup>7</sup>, Hrvoje Petkovic<sup>15</sup>, Jean M. Brunel<sup>16</sup>, Kenneth C. Keiler<sup>3</sup>, Nils Metzler-Nolte<sup>4</sup>, Julia E. Bandow<sup>1\*</sup>

<sup>1</sup>Applied Microbiology, Faculty of Biology and Biotechnology, Ruhr University Bochum, 44780 Bochum, Germany

<sup>2</sup>currently: Biology and Biological Engineering, Chalmers University of Technology, 412 96 Gothenburg, Sweden

<sup>3</sup>Biochemistry and Molecular Biology, Pennsylvania State University, PA 16802, USA

<sup>4</sup>Bioinorganic Chemistry, Faculty of Chemistry and Biochemistry, Ruhr University Bochum, 44780 Bochum, Germany

<sup>5</sup>currently: Laboratory of Organic Chemistry, Wageningen University and Research, 6708 WE Wageningen, The Netherlands

<sup>6</sup>ACIES BIO, Tehnološki park 21, 1000 Ljubljana, Slovenia

<sup>7</sup>currently: National Institute of Biology, 1000 Ljubljana, Slovenia

<sup>8</sup>Department of Chemistry, University of California Davis, CA 95616, USA

<sup>9</sup>Department of General Microbiology, Institute of Microbiology and Genetics, Georg-August University Göttingen, 37073 Göttingen, Germany

<sup>10</sup>Microbial Biochemistry, Institute of Biochemistry and Pathobiochemistry, Ruhr University Bochum, 44780 Bochum, Germany

<sup>11</sup>Peptide Lipid Interactions, Leibniz Institute for Molecular Pharmacology, 13125 Berlin, Germany

<sup>12</sup>currently: Department of Wildlife Diseases, Leibniz Institute for Zoo and Wildlife Research, 10315 Berlin, Germany

<sup>13</sup>Microbial Bioactive Compounds, Interfaculty Institute of Microbiology and Infection Medicine Tübingen, University of Tübingen, 72076 Tübingen, Germany.

<sup>14</sup>Biomolecular Chemistry, Leibniz Institute for Natural Product Research and Infection Biology - Hans Knöll Institute, 07745 Jena, Germany

<sup>15</sup>Biotechnical Faculty, University of Ljubljana, 1001 Ljubljana, Slovenia

<sup>16</sup>UMR MD1, Membranes et Cibles Thérapeutiques, Faculté de pharmacie U1261 INSERM, Aix-Marseille Université, 13385 Marseille, France

#### **\*Corresponding Author**

Julia E. Bandow, julia.bandow@rub.de, +49 234 32 23102

#### **Content:**

##### **Supplementary tables S1-71**

**Supplementary tables S1-40** (pages 2-29) contain protein names, functions, and regulation factors for all proteomic response profiles described newly in this work.

**Supplementary tables S41-71** (pages 30-52) show data of the mass spectrometry-based identification of marker proteins from non-radioactive gels.

##### **Supplementary figures S1-36**

**Supplementary figures S1-34** (pages 53-74) show growth curves, representative proteomic profiles, and the structures of the used compounds for all newly described response profiles.

**Figure S35** (page 75) shows the growth curves and structures of the antibiotics, which did not elicit a proteomic response in *Bacillus subtilis* 168.

**Figure S36** (page 75) shows growth of *B. subtilis* 168 and a  $\Delta ytrA$  mutant that constitutively expresses the *ytrGABCDEF* operon, when treated with nisin.

##### **COPR step-by-step guide**

On page 76 a step-by-step guide on how to use the proteomic response library is given.

##### **References**

Pages 77 and 78.

## Supplementary tables

**Tab. S1 Marker proteins of acyldepsipeptide.** Given are averages of regulation factors of three independent biological replicates. Protein functions and regulation are taken from the SubtiWiki database<sup>1</sup>. Superscripts indicate that the protein was identified in multiple spots on the gel image (see Fig. S1).

| protein            | regulation factor | function                                                       | regulation                                               |
|--------------------|-------------------|----------------------------------------------------------------|----------------------------------------------------------|
| AroA               | 2.7               | biosynthesis of aromatic amino acids                           |                                                          |
| ClpC <sup>1</sup>  | 3.1               | protein degradation, positive regulator of autolysin synthesis | $\sigma^A$ , $\sigma^B$ , $\sigma^F$ , $\sigma^M$ , CtsR |
| ClpC <sup>2</sup>  | 4.9               |                                                                |                                                          |
| ClpC <sup>3</sup>  | 8.4               |                                                                |                                                          |
| ClpC <sup>4</sup>  | 3.7               |                                                                |                                                          |
| ClpE <sup>1</sup>  | 3.3               | protein degradation                                            | $\sigma^A$ , CtsR                                        |
| ClpE <sup>2</sup>  | 4.6               |                                                                |                                                          |
| ClpP               | 3.0               | protein degradation                                            | $\sigma^A$ , $\sigma^B$ , CtsR                           |
| ClpY               | 3.9               | protein degradation                                            | $\sigma^A$ , CodY                                        |
| DnaK <sup>1</sup>  | 3.3               | protein quality control                                        | $\sigma^A$ , HrcA                                        |
| DnaK <sup>2</sup>  | 5.4               |                                                                |                                                          |
| GroEL <sup>1</sup> | 5.7               | protein folding and refolding                                  | $\sigma^A$ , HrcA                                        |
| GroEL <sup>2</sup> | 2.7               |                                                                |                                                          |
| GroEL <sup>3</sup> | 2.1               |                                                                |                                                          |
| GroEL <sup>4</sup> | 10.0              |                                                                |                                                          |
| PunA               | 3.9               | purine salvage and interconversion                             | $\sigma^A$ , CcpA                                        |
| SodA               | 3.0               | detoxification of oxygen radicals                              | $\sigma^B$                                               |
| ThrS               | 3.5               | translation                                                    | $\sigma^A$ , T-box                                       |
| TufA <sup>1</sup>  | 2.8               | translation                                                    | stringent response                                       |
| TufA <sup>2</sup>  | 2.5               |                                                                |                                                          |
| YfkM               | 4.0               | detoxification of methylglyoxal                                | $\sigma^B$ , Fur                                         |
| Ywfl               | 2.5               | lipoic acid metabolism                                         |                                                          |

**Tab. S2 Marker proteins of amidochelocardin 5  $\mu\text{g/ml}$ .** Given are averages of regulation factors of three independent biological replicates. Protein functions and regulation are taken from the SubtiWiki database<sup>1</sup>.

| protein | regulation factor | function                                            | regulation                           |
|---------|-------------------|-----------------------------------------------------|--------------------------------------|
| Abh     | 3.4               | transcriptional regulator of transition state genes | $\sigma^M$ , $\sigma^V$ , $\sigma^X$ |
| PanB    | 4.2               | biosynthesis of coenzyme A                          |                                      |
| YdjL    | 3.8               | overflow metabolism; fermentation                   | AbrB                                 |
| YwbC    | 3.5               | detoxification of methylglyoxal                     |                                      |
| YxxG    | 3.1               | intercellular competition; protection against WapA  | $\sigma^A$ , DegU, WalR, YvrHb       |

**Tab. S3 Marker proteins of amidochelocardin 10  $\mu\text{g/ml}$ .** Given are averages of regulation factors of three independent biological replicates. Protein functions and regulation are taken from the SubtiWiki database<sup>1</sup>.

| protein | regulation factor | function                                                       | regulation                                        |
|---------|-------------------|----------------------------------------------------------------|---------------------------------------------------|
| Abh     | 5.2               | transcriptional regulator of transition state genes            | $\sigma^M$ , $\sigma^V$ , $\sigma^X$              |
| Apt     | 2.6               | purine salvage and interconversion                             | stringent response                                |
| CodY    | 2.5               | regulation of response to branched-chain amino acid limitation | $\sigma^A$ , CodY                                 |
| LiaH    | 39.2              | resistance against oxidative stress and cell wall antibiotics  | $\sigma^A$ , LiaR                                 |
| LpdV    | 2.2               | utilization of branched-chain keto acids                       | $\sigma^I$ , BkdR, CodY                           |
| MccA    | 57.0              | methionine-to-cystein conversion                               | $\sigma^A$ , CymR, Spx                            |
| MtnB    | 2.5               | methionine salvage                                             | $\sigma^A$ , S-box                                |
| PspA    | 3.6               | unknown                                                        | $\sigma^W$ , AbrB                                 |
| RibH    | 3.5               | riboflavin biosynthesis                                        | $\sigma^A$ , FMN-box                              |
| SufB    | 3.0               | synthesis of iron-sulfur clusters                              | $\sigma^A$                                        |
| TasA    | 3.9               | biofilm formation                                              | $\sigma^A$ , AbrB, LutR, RemA, SinR               |
| YceC    | 4.0               | unknown                                                        | $\sigma^B$ , $\sigma^M$ , $\sigma^W$ , $\sigma^X$ |
| YfmS    | 3.8               | control of chemotaxis                                          | $\sigma^D$                                        |
| YtoP    | 3.2               | unknown                                                        |                                                   |
| YxxG    | 2.7               | intercellular competition; protection against WapA             | $\sigma^A$ , DegU, WalR, YvrHb                    |

**Tab. S4 Marker proteins of amidochelocardin 20 µg/ml.** Given are averages of regulation factors of three independent biological replicates. Protein functions and regulation are taken from the SubtiWiki database<sup>1</sup>. Superscripts indicate that the protein was identified in multiple spots on the gel image (see Fig. S2).

| <b>protein</b>    | <b>regulation factor</b> | <b>function</b>                                               | <b>regulation</b>                        |
|-------------------|--------------------------|---------------------------------------------------------------|------------------------------------------|
| Abh               | 3.0                      | transcriptional regulator of transition state genes           | $\sigma^M, \sigma^V, \sigma^X$           |
| AccB              | 3.2                      | production of malonyl-CoA                                     |                                          |
| Adk               | 2.7                      | ADP formation                                                 | $\sigma^A$ , stringent response          |
| AhpC <sup>1</sup> | 2.6                      | resistance against peroxide stress                            | $\sigma^A$ , PerR                        |
| AhpC <sup>2</sup> | 3.9                      |                                                               |                                          |
| BkdAA             | 5.1                      | utilization of branched-chain keto acids                      | $\sigma^L$ , BkdR, CodY                  |
| Dps               | 3.0                      | iron storage, survival of stress conditions                   | $\sigma^B$                               |
| GreA              | 2.3                      | transcription elongation                                      |                                          |
| LiaH <sup>1</sup> | 667.8                    | resistance against oxidative stress and cell wall antibiotics | $\sigma^A$ , LiaR                        |
| LiaH <sup>2</sup> | 152.8                    |                                                               |                                          |
| LiaH <sup>3</sup> | 37.9                     |                                                               |                                          |
| LpdV <sup>1</sup> | 7.6                      | utilization of branched-chain keto acids                      | $\sigma^L$ , BkdR, CodY                  |
| LpdV <sup>2</sup> | 6.7                      |                                                               |                                          |
| MccA              | 53.7                     | methionine-to-cystein conversion                              | $\sigma^A$ , CymR, Spx                   |
| PanB              | 9.8                      | biosynthesis of coenzyme A                                    |                                          |
| PdxT              | 2.3                      | pyridoxal-5-phosphate biosynthesis                            | Spo0A                                    |
| PspA              | 15.6                     | unknown                                                       | $\sigma^W$ , AbrB                        |
| RibH              | 5.4                      | riboflavin biosynthesis                                       | $\sigma^A$ , FMN-box                     |
| RsbV              | 2.6                      | control of $\sigma^B$ activity                                | $\sigma^A, \sigma^B$ , CcpA              |
| SodA              | 2.3                      | detoxification of oxygen radicals                             | $\sigma^B$                               |
| SufB              | 3.7                      | synthesis of iron-sulfur clusters                             | $\sigma^A$                               |
| ThiD              | 7.1                      | biosynthesis of thiamine pyrophosphate                        | Thi-box                                  |
| TrxA              | 2.8                      | protections of proteins against oxidative damage              | $\sigma^A, \sigma^B$ , CtsR, Spx         |
| YceC              | 7.4                      | unknown                                                       | $\sigma^B, \sigma^M, \sigma^W, \sigma^X$ |
| YceH              | 4.2                      | unknown                                                       | $\sigma^B, \sigma^M, \sigma^W, \sigma^X$ |
| YdjL              | 22.6                     | overflow metabolism, fermentation                             | AbrB                                     |
| YfmS              | 10.1                     | control of chemotaxis                                         | $\sigma^D$                               |
| YhdN              | 2.8                      | detoxification of methylglyoxal                               | $\sigma^B$ , FapR                        |
| YuaI              | 8.2                      | unknown                                                       | $\sigma^W$                               |
| YviB              | 3.1                      | unknown                                                       | $\sigma^W$                               |

**Tab. S5 Marker proteins of AN3334.** Given are averages of regulation factors of three independent biological replicates. Protein functions and regulation are taken from the SubtiWiki database<sup>1</sup>.

| protein | regulation factor | function                                                                              | regulation                                  |
|---------|-------------------|---------------------------------------------------------------------------------------|---------------------------------------------|
| AroA    | 3.8               | biosynthesis of aromatic amino acids                                                  |                                             |
| BacB    | 3.8               | biosynthesis of the antibiotic bacilysin                                              | $\sigma^A$ , AbrB, CodY, ScoC               |
| GsiB    | 10.3              | response to water deficits                                                            | $\sigma^B$ , $\sigma^I$                     |
| IlvC    | 4.3               | biosynthesis of branched-chain amino acids                                            | $\sigma^A$ , CcpA, CodY, TnrA, T-box        |
| LeuD    | 13.7              | biosynthesis of leucine                                                               | $\sigma^A$ , CcpA, CodY, FsrA, TnrA, T-box  |
| NfrA    | 3.4               | unknown                                                                               | $\sigma^A$ , $\sigma^D$ , Spo0A, Spx        |
| OhrB    | 4.1               | organic peroxide resistance                                                           | $\sigma^B$                                  |
| PstS    | 3.0               | high-affinity phosphate uptake                                                        | $\sigma^A$ , PhoP                           |
| RocA    | 6.7               | arginine, ornithine and citrulline utilization                                        | $\sigma^L$ , AbrB, AhrC, CodY, RocR         |
| SpoVG   | 3.3               | cell division; control of sporulation initiation                                      | $\sigma^H$ , AbrB, SinR                     |
| YfkM    | 2.8               | detoxification of methylglyoxal                                                       | $\sigma^B$ , Fur                            |
| YlbA    | 2.8               | unknown                                                                               | AbrB                                        |
| YneT    | 3.4               | unknown                                                                               |                                             |
| YsnF    | 2.4               | survival of ethanol stress                                                            | $\sigma^B$                                  |
| YtxH    | 3.6               | unknown                                                                               | $\sigma^B$ , $\sigma^H$                     |
| YuaE    | 2.9               | unknown                                                                               |                                             |
| YukJ    | 6.5               | unknown                                                                               |                                             |
| YvyD    | 9.4               | dimerization of ribosomes in the stationary phase, protection against paraquat stress | $\sigma^B$ , $\sigma^D$ , $\sigma^H$ , PhoP |

**Tab. S6 Marker proteins of anhydrotetracycline 0.5  $\mu\text{g/ml}$ .** Given are averages of regulation factors of three independent biological replicates. Protein functions and regulation are taken from the SubtiWiki database<sup>1</sup>. Superscripts indicate that the protein was identified in multiple spots on the gel image (see Fig. S4).

| protein          | regulation factor | function                                                       | regulation                                        |
|------------------|-------------------|----------------------------------------------------------------|---------------------------------------------------|
| Abh              | 2.7               | transcriptional regulator of transition state genes            | $\sigma^M$ , $\sigma^V$ , $\sigma^X$              |
| Adk <sup>1</sup> | 3.3               | ADP formation                                                  | $\sigma^A$ , stringent response                   |
| Adk <sup>2</sup> | 3.9               |                                                                |                                                   |
| GrpE             | 2.6               | control of DnaK activity                                       | $\sigma^A$ , HrcA                                 |
| HprT             | 2.9               | purine salvage and interconversion; control of ftsH expression | $\sigma^A$ , $\sigma^F$ , $\sigma^M$ , HprT, TolS |
| PanB             | 2.8               | biosynthesis of coenzyme A                                     |                                                   |
| PpiB             | 2.4               | protein folding                                                | $\sigma^A$                                        |
| PtsH             | 2.8               | PTS-dependent sugar transport and carbon catabolite repression | $\sigma^A$ , GlcT, stringent response             |
| PurB             | 2.6               | purine biosynthesis                                            | $\sigma^A$ , PurR, G-Box                          |
| RplJ             | 2.6               | translation                                                    | RplJ, RplL, stringent response                    |
| RpsF             | 3.5               | translation                                                    | stringent response                                |
| YpuA             | 4.4               | unknown                                                        | $\sigma^M$                                        |
| YtpR             | 2.5               | unknown                                                        | $\sigma^A$ , Spx                                  |

**Tab. S7 Marker proteins of anhydrotetracycline 2 µg/ml.** Given are averages of regulation factors of three independent biological replicates. Protein functions and regulation are taken from the SubtiWiki database<sup>1</sup>. Superscripts indicate that the protein was identified in multiple spots on the gel image (see Fig. S4).

| protein           | regulation factor | function                                                       | regulation                                                                  |
|-------------------|-------------------|----------------------------------------------------------------|-----------------------------------------------------------------------------|
| Abh               | 5.6               | transcriptional regulator of transition state genes            | $\sigma^M, \sigma^V, \sigma^X$                                              |
| Adk               | 3.3               | ADP formation                                                  | $\sigma^A$ , stringent response                                             |
| Apt               | 2.8               | purine salvage and interconversion                             | stringent response                                                          |
| Ctc               | 3.2               | unknown                                                        | $\sigma^A, \sigma^B$ , stringent response                                   |
| DitA              | 5.9               | biosynthesis of teichoic acid                                  | $\sigma^D, \sigma^M, \sigma^V, \sigma^X$ , Spo0A, YvrHB, stringent response |
| FabD              | 2.8               | fatty acid biosynthesis                                        | $\sigma^A$ , ComA, FapR                                                     |
| FlgK              | 4.3               | motility and chemotaxis                                        | $\sigma^A, \sigma^D$ , ComK, DegU, ScoC                                     |
| GcaD              | 7.7               | cell wall metabolism                                           | $\sigma^A$ , stringent response                                             |
| GrpE              | 6.0               | control of DnaK activity                                       | $\sigma^A$ , HrcA                                                           |
| HemE              | 4.6               | heme biosynthesis                                              |                                                                             |
| HprT              | 2.8               | purine salvage and interconversion; control of ftsH expression | $\sigma^A, \sigma^F, \sigma^M$ , HprT, TolS                                 |
| HslO              | 7.4               | unknown                                                        | $\sigma^M$                                                                  |
| LiaH <sup>1</sup> | 105.8             | resistance against oxidative stress and cell wall              |                                                                             |
| LiaH <sup>2</sup> | 4.0               | antibiotics                                                    | $\sigma^A$ , LiaR                                                           |
| Nfo               | 4.0               | repair of oxidative DNA damage in spores                       | $\sigma^G$                                                                  |
| OhrB              | 4.3               | organic peroxide resistance                                    | $\sigma^B$                                                                  |
| PanB              | 3.4               | biosynthesis of coenzyme A                                     |                                                                             |
| PanC              | 3.4               | biosynthesis of coenzyme A                                     |                                                                             |
| PspA              | 4.8               | unknown                                                        | $\sigma^W$ , AbrB                                                           |
| PtsH              | 4.1               | PTS-dependent sugar transport and carbon catabolite repression | $\sigma^A$ , GlcT, stringent response                                       |
| PurC              | 2.4               | purine biosynthesis                                            | $\sigma^A$ , PurR, G-box                                                    |
| RplJ              | 3.6               | translation                                                    | RplJ, RplL, stringent response                                              |
| RpsF              | 4.5               | translation                                                    | stringent response                                                          |
| RsbW              | 3.2               | control of $\sigma^B$ activity                                 | $\sigma^A, \sigma^B$ , CcpA                                                 |
| SpeB              | 3.4               | spermidine, polyamine biosynthesis                             | $\sigma^A$                                                                  |
| ThrC              | 3.7               | biosynthesis of threonine                                      | CodY, ThrR, TnrA                                                            |
| YceC              | 3.7               | unknown                                                        | $\sigma^B, \sigma^M, \sigma^W, \sigma^X$                                    |
| YceH              | 2.1               | unknown                                                        | $\sigma^B, \sigma^M, \sigma^W, \sigma^X$                                    |
| Ydgl              | 4.1               | unknown                                                        |                                                                             |
| YfmS              | 9.0               | control of chemotaxis                                          | $\sigma^D$                                                                  |
| YhcB              | 7.4               | unknown                                                        |                                                                             |
| YlbN              | 4.3               | accumulation of 23S rRNA                                       | stringent response                                                          |
| YojG              | 3.3               | biosynthesis of bacillithiol                                   | $\sigma^A$ , Spx                                                            |
| YoxD              | 2.8               | unknown                                                        |                                                                             |
| YpuA              | 14.8              | unknown                                                        | $\sigma^M$                                                                  |
| YqiK              | 7.1               | unknown                                                        | $\sigma^A$                                                                  |
| YtpR              | 3.0               | unknown                                                        | $\sigma^A$ , Spx                                                            |
| YtsP              | 3.2               | unknown                                                        |                                                                             |
| YuaE              | 6.9               | unknown                                                        |                                                                             |
| YvlB <sup>1</sup> | 3.1               | unknown                                                        |                                                                             |
| YvlB <sup>2</sup> | 2.6               | unknown                                                        | $\sigma^W$                                                                  |

**Tab. S8 Marker proteins of anhydrotetracycline 4 µg/ml.** Given are averages of regulation factors of three independent biological replicates. Protein functions and regulation are taken from the SubtiWiki database<sup>1</sup>. Superscripts indicate that the protein was identified in multiple spots on the gel image (see Fig. S4).

| protein           | regulation factor | function                                                       | regulation                                                                  |
|-------------------|-------------------|----------------------------------------------------------------|-----------------------------------------------------------------------------|
| Abh <sup>1</sup>  | 7.4               | transcriptional regulator of transition state genes            | $\sigma^M, \sigma^V, \sigma^X$                                              |
| Abh <sup>2</sup>  | 2.9               |                                                                |                                                                             |
| Apt               | 3.2               | purine salvage and interconversion                             | stringent response                                                          |
| Ctc               | 5.4               | unknown                                                        | $\sigma^A, \sigma^B$ , stringent response                                   |
| DltA              | 5.2               | biosynthesis of teichoic acid                                  | $\sigma^D, \sigma^M, \sigma^V, \sigma^X$ , Spo0A, YvrHB, stringent response |
| FabD              | 2.7               | fatty acid biosynthesis                                        | $\sigma^A$ , ComA, FapR                                                     |
| FlgK              | 5.3               | motility and chemotaxis                                        | $\sigma^A, \sigma^D$ , ComK, DegU, ScoC                                     |
| GcaD              | 11.1              | cell wall metabolism                                           | $\sigma^A$ , stringent response                                             |
| GroES             | 2.8               |                                                                |                                                                             |
| GrpE              | 10.6              | control of DnaK activity                                       | $\sigma^A$ , HrcA                                                           |
| HemE              | 5.5               | heme biosynthesis                                              |                                                                             |
| HprT              | 2.7               | purine salvage and interconversion; control of ftsH expression | $\sigma^A, \sigma^F, \sigma^M$ , HprT, TilS                                 |
| HslO              | 11.0              | unknown                                                        | $\sigma^M$                                                                  |
| LiaH <sup>1</sup> | 142.5             | resistance against oxidative stress and cell wall antibiotics  | $\sigma^A$ , LiaR                                                           |
| LiaH <sup>2</sup> | 6.8               |                                                                |                                                                             |
| MurAA             | 3.0               | peptidoglycan precursor biosynthesis                           | $\sigma^A, \sigma^F$                                                        |
| MurF              | 3.3               | peptidoglycan precursor biosynthesis                           | $\sigma^M, \sigma^V$                                                        |
| Nfo               | 2.7               | repair of oxidative DNA damage in spores                       | $\sigma^G$                                                                  |
| OhrB              | 5.8               | organic peroxide resistance                                    | $\sigma^B$                                                                  |
| OpuAA             | 2.4               | compatible solute transport                                    | $\sigma^A$ , RemA                                                           |
| PanC              | 3.3               | biosynthesis of coenzyme A                                     |                                                                             |
| PspA              | 3.5               | unknown                                                        | $\sigma^W$ , AbrB                                                           |
| PtsH              | 5.8               | PTS-dependent sugar transport and carbon catabolite repression | $\sigma^A$ , GlcT, stringent response                                       |
| RplJ              | 3.6               | translation                                                    | RplJ, RplL, stringent response                                              |
| RpsF              | 5.9               | translation                                                    | stringent response                                                          |
| RsbW              | 5.0               | control of $\sigma^B$ activity                                 | $\sigma^A, \sigma^B$ , CcpA                                                 |
| SpeB              | 3.5               | spermidine; polyamine biosynthesis                             | $\sigma^A$                                                                  |
| SpoVG             | 3.0               | cell division; control of sporulation initiation               | $\sigma^H$ , AbrB, SinR                                                     |
| YceC              | 4.2               | unknown                                                        | $\sigma^B, \sigma^M, \sigma^W, \sigma^X$                                    |
| Ydgl              | 6.1               | unknown                                                        |                                                                             |
| YfmS              | 22.9              | control of chemotaxis                                          | $\sigma^D$                                                                  |
| YhcB              | 7.1               | unknown                                                        |                                                                             |
| YlbN              | 4.2               | accumulation of 23S rRNA                                       | stringent response                                                          |
| YojG              | 2.7               | biosynthesis of bacillithiol                                   | $\sigma^A$ , Spx                                                            |
| YoxD              | 2.8               | unknown                                                        |                                                                             |
| YpuA              | 12.5              | unknown                                                        | $\sigma^M$                                                                  |
| YqeY              | 2.4               | unknown                                                        |                                                                             |
| YqiK              | 12.6              | unknown                                                        | $\sigma^A$                                                                  |
| YtpR              | 3.1               | unknown                                                        | $\sigma^A$ , Spx                                                            |
| YtsP              | 3.8               | unknown                                                        |                                                                             |
| YuaE              | 3.0               | unknown                                                        |                                                                             |

**Tab. S9 Marker Proteins of As<sub>2</sub>O<sub>3</sub>.** Given are averages of regulation factors of three independent biological replicates. Protein functions and regulation are taken from the SubtiWiki database<sup>1</sup>.

| protein | regulation factor | function                                                                              | regulation                                               |
|---------|-------------------|---------------------------------------------------------------------------------------|----------------------------------------------------------|
| AhpF    | 3.0               | resistance against peroxide stress                                                    | $\sigma^A$ , PerR                                        |
| Ald     | 25.8              | alanine utilization                                                                   | $\sigma^A$ , AdeR                                        |
| AmpS    | 3.1               | required for biofilm formation                                                        |                                                          |
| ArsC    | 26.0              | detoxification of arsenate                                                            | $\sigma^A$ , $\sigma^F$ , ArsR                           |
| AzoR1   | 7.6               | quinone detoxification                                                                | YodB                                                     |
| ClpC    | 4.4               | protein degradation; positive regulator of autolysin synthesis                        | $\sigma^A$ , $\sigma^B$ , $\sigma^F$ , $\sigma^M$ , CtsR |
| ClpX    | 3.0               | protein degradation                                                                   | $\sigma^A$ , CtsR                                        |
| CysK    | 9.4               | biosynthesis of cysteine; control of CymR activity                                    | $\sigma^A$ , $\sigma^M$ , CymR, Spx                      |
| CysS    | 2.9               | cysteine synthesis                                                                    | $\sigma^A$ , T-box                                       |
| GroEL   | 6.3               | protein folding and re-folding                                                        | $\sigma^A$ , HrcA                                        |
| Hag     | 3.6               | motility and chemotaxis                                                               | $\sigma^D$ , CodY, CsrA, ScoC                            |
| KatA    | 10.4              | detoxification of hydrogen peroxide                                                   | PerR                                                     |
| Pdp     | 3.0               | pyrimidine interconversion                                                            | $\sigma^A$ , CcpA, DeoR                                  |
| PspA    | 7.4               | unknown                                                                               | $\sigma^W$ , AbrB                                        |
| PtsI    | 6.3               | PTS-dependent sugar transport                                                         | $\sigma^A$ , GlcT, stringent response                    |
| TyrS    | 25.8              | synthesis of tyrosyl-tRNA                                                             | $\sigma^A$ , CcpA, CodY, T-box                           |
| YjdF    | 3.6               | unknown                                                                               | $\sigma^A$ , MarR, RNA switch                            |
| YqcK    | 15.9              | unknown                                                                               | $\sigma^A$ , $\sigma^F$ , ArsR                           |
| YrhB    | 28.3              | methionine-to-cysteine conversion                                                     | $\sigma^A$ , CymR, Spx                                   |
| YutF    | 6.6               | unknown                                                                               | $\sigma^A$                                               |
| YvyD    | 16.5              | dimerization of ribosomes in the stationary phase; protection against paraquat stress | $\sigma^B$ , $\sigma^D$ , $\sigma^H$ , PhoP              |
| YwaA    | 6.7               | biosynthesis of branched-chain amino acids                                            | CodY                                                     |
| Ywfl    | 3.7               | lipoic acid metabolism                                                                |                                                          |
| YxeK    | 2.5               | utilization and detoxification of S-(2-succino)cysteine                               | $\sigma^A$ , CymR                                        |

**Tab. S10 Marker Proteins of As<sub>2</sub>O<sub>5</sub>.** Given are averages of regulation factors of three independent biological replicates. Protein functions and regulation are taken from the SubtiWiki database<sup>1</sup>.

| protein | regulation factor | function                                           | regulation                                   |
|---------|-------------------|----------------------------------------------------|----------------------------------------------|
| BkdAA   | 48.5              | utilization of branched-chain keto acids           | $\sigma^L$ , BkdR, CodY                      |
| Cah     | 7.3               | resistance to cephalosporin C                      |                                              |
| Ctc     | 14.1              | unknown                                            | $\sigma^A$ , $\sigma^B$ , stringent response |
| CysK    | 6.2               | biosynthesis of cysteine; control of CymR activity | $\sigma^A$ , $\sigma^M$ , CymR, Spx          |
| Dps     | 7.6               | iron storage, survival of stress conditions        | $\sigma^B$                                   |
| Eno     | 4.2               | enzyme in glycolysis/gluconeogenesis               | $\sigma^A$ , CggR                            |
| Hag     | 3.9               | motility and chemotaxis                            | $\sigma^D$ , CodY, CsrA, ScoC                |
| Spo0M   | 5.9               | sporulation                                        | $\sigma^H$ , $\sigma^W$                      |
| ThrB    | 40.4              | biosynthesis of threonine                          | CodY, ThrR, TnrA                             |
| YfmS    | 3.0               | control of chemotaxis                              | $\sigma^D$                                   |
| YhfK    | 5.8               | unknown                                            |                                              |
| YkwC    | 80.7              | unknown                                            |                                              |
| YtxH    | 6.6               | unknown                                            | $\sigma^B$ , $\sigma^H$                      |

**Tab. S11 Marker proteins of ASD.** Given are averages of regulation factors of three independent biological replicates. Protein functions and regulation are taken from the SubtiWiki database<sup>1</sup>. Superscripts indicate that the protein was identified in multiple spots on the gel image (see Fig. S7).

| protein           | regulation factor | function                                                                              | regulation                                |
|-------------------|-------------------|---------------------------------------------------------------------------------------|-------------------------------------------|
| CspR              | 2.5               | translation                                                                           | $\sigma^E$                                |
| Ctc               | 5.4               | unknown                                                                               | $\sigma^A, \sigma^B$ , stringent response |
| Eno               | 3.7               | enzyme in glycolysis/gluconeogenesis                                                  | $\sigma^A$ , CggR                         |
| FabZ              | 4.5               | fatty acid biosynthesis                                                               |                                           |
| IspF              | 8.2               | MEP pathway of isoprenoid biosynthesis                                                | $\sigma^B, \sigma^M$                      |
| LiaH              | 8.1               | resistance against oxidative stress and cell wall antibiotics                         | $\sigma^A$ , LiaR                         |
| MsrB              | 3.5               | regeneration of methionine and restoration of protein function after oxidative damage | $\sigma^A$ , Spx                          |
| NadE              | 2.7               | NAD biosynthesis                                                                      | $\sigma^A, \sigma^B$                      |
| OhrB              | 3.8               | organic peroxide resistance                                                           | $\sigma^B$                                |
| PepF              | 3.9               | protein degradation                                                                   |                                           |
| Pgm               | 2.4               | enzyme in glycolysis/gluconeogenesis                                                  | $\sigma^A$ , CggR                         |
| PrmA              | 4.6               | unknown                                                                               | $\sigma^A$ , HrcA                         |
| PspA              | 10.1              | unknown                                                                               | $\sigma^W$ , AbrB                         |
| PtsH              | 4.2               | PTS-dependent sugar transport and carbon catabolite repression                        | $\sigma^A$ , GlcT, stringent response     |
| RacX              | 5.1               | production of non-canonical D-amino acids                                             | $\sigma^W$                                |
| RibH              | 3.8               | riboflavin synthesis                                                                  | $\sigma^A$ , FMN-box                      |
| RimM              | 2.9               | maturation of 16S rRNA                                                                |                                           |
| RplL <sup>1</sup> | 4.5               |                                                                                       |                                           |
| RplL <sup>2</sup> | 3.2               | translation                                                                           | RplL, stringent response                  |
| RplS              | 2.9               | translation                                                                           | stringent response                        |
| Sat               | 2.6               | sulfate activation                                                                    | $\sigma^A$ , CymR, S-box                  |
| SdhA              | 6.4               | TCA cycle                                                                             | $\sigma^A$ , FarA                         |
| SigX              | 3.9               | resistance to cationic antimicrobial peptides                                         | $\sigma^A, \sigma^X$ , YvrHb              |
| ThrC              | 2.6               | biosynthesis of threonine                                                             | CodY, ThrR, TnrA                          |
| TrmK              | 4.7               | tRNA modification                                                                     |                                           |
| YceC              | 5.3               | unknown                                                                               | $\sigma^B, \sigma^M, \sigma^W, \sigma^X$  |
| YfmS              | 8.3               | control of chemotaxis                                                                 | $\sigma^D$                                |
| YjdA              | 4.5               | unknown                                                                               |                                           |
| YjoA              | 3.0               | unknown                                                                               |                                           |
| YphP              | 3.1               | de-bacillithiolation of S-bacillithiolated OhrR and MetE                              |                                           |
| YqhS              | 2.3               | unknown                                                                               |                                           |
| YqiG              | 2.6               | unknown                                                                               |                                           |
| YqkB              | 3.4               | unknown                                                                               |                                           |
| YqkF              | 8.2               | unknown                                                                               | $\sigma^E$                                |
| YsnF              | 4.4               | survival of ethanol stress                                                            | $\sigma^B$                                |
| YutE              | 4.0               | unknown                                                                               | $\sigma^A$                                |
| YvlB              | 4.8               | unknown                                                                               | $\sigma^W$                                |
| YwrO              | 3.9               | unknown                                                                               |                                           |



**Tab. S12 Marker proteins of auranofin.** Given are averages of regulation factors of three independent biological replicates. Protein functions and regulation are taken from the SubtiWiki database<sup>1</sup>. Superscripts indicate that the protein was identified in multiple spots on the gel image (see Fig. S8).

| <b>protein</b>    | <b>regulation factor</b> | <b>function</b>                                         | <b>regulation</b>                   |
|-------------------|--------------------------|---------------------------------------------------------|-------------------------------------|
| ArsC              | 10.7                     | detoxification of arsenate                              | $\sigma^A$ , $\sigma^F$ , ArsR      |
| Cah               | 13.3                     | resistance to cephalosporin C                           |                                     |
| CitB              | 18.5                     | TCA cycle                                               | $\sigma^A$ , CcpA, CcpC, CodY, FsrA |
| CitZ              | 5.9                      | TCA cycle                                               | $\sigma^A$ , CcpA, CcpC, CitB       |
| Hag               | 2.8                      | motility and chemotaxis                                 | $\sigma^D$ , CodY, CsrA, ScoC       |
| KatA <sup>1</sup> | 18.1                     |                                                         |                                     |
| KatA <sup>2</sup> | 6.9                      |                                                         |                                     |
| KatA <sup>3</sup> | 6.5                      | detoxification of hydrogen peroxide                     | PerR                                |
| KatA <sup>4</sup> | 5.5                      |                                                         |                                     |
| MrgA              | 8.4                      | iron storage                                            | $\sigma^A$ , PerR                   |
| YpfD              | 8.4                      | unknown                                                 |                                     |
| YrhB <sup>1</sup> | 12.2                     |                                                         |                                     |
| YrhB <sup>2</sup> | 3.5                      | methionine-to-cystein conversion                        | $\sigma^A$ , CymR, Spx              |
| YuaE              | 3.4                      | unknown                                                 |                                     |
| YwkD              | 4.6                      | unknown                                                 |                                     |
| YxeP              | 3.5                      | utilization and detoxification of S-(2-succino)cysteine | $\sigma^A$ , CymR                   |

**Tab. S13 Marker proteins BA234.** Given are averages of regulation factors of three independent biological replicates. Protein functions and regulation are taken from the SubtiWiki database<sup>1</sup>. Superscripts indicate that the protein was identified in multiple spots on the gel image (see Fig. S9).

| protein           | regulation factor | function                                                      | regulation                                               |
|-------------------|-------------------|---------------------------------------------------------------|----------------------------------------------------------|
| AcsA <sup>1</sup> | 6.7               | utilization of acetate, fatty acids                           | $\sigma^A$ , CcpA, CodY                                  |
| AcsA <sup>2</sup> | 9.4               |                                                               |                                                          |
| AtpA              | 7.7               | ATP synthesis                                                 | stringent response                                       |
| CitZ              | 4.2               | TCA cycle                                                     | $\sigma^A$ , CcpA, CcpC, CitB                            |
| ClpP              | 4.3               | protein degradation                                           | $\sigma^A$ , $\sigma^B$ , CtsR                           |
| DisA              | 3.9               | control of sporulation initiation                             | $\sigma^A$ , $\sigma^B$ , $\sigma^F$ , $\sigma^W$ , CtsR |
| FabG              | 6.9               | fatty acid biosynthesis                                       | $\sigma^A$ , ComA, FapR                                  |
| FbaA              | 3.7               | enzyme in glycolysis/gluconeogenesis                          |                                                          |
| GsiB              | 3.1               | response to water deficits                                    | $\sigma^B$ , $\sigma^I$                                  |
| HemH              | 3.8               | biosynthesis of heme                                          |                                                          |
| lolD              | 4.5               | myo-inositol catabolism                                       | $\sigma^A$ , CcpA, lolR                                  |
| LiaH <sup>1</sup> | 42.9              | resistance against oxidative stress and cell wall antibiotics | $\sigma^A$ , LiaR                                        |
| LiaH <sup>2</sup> | 33.3              |                                                               |                                                          |
| LiaH <sup>3</sup> | 6.7               |                                                               |                                                          |
| LiaR              | 5.6               | regulation of the <i>liaI-liaH-liaG-liaF-liaS-liaR</i> operon | $\sigma^A$ , LiaR                                        |
| LpdV              | 3.4               | utilization of branched-chain keto acids                      | $\sigma^L$ , CodY, BkdR                                  |
| MlpA              | 9.3               | control of proteolytic activity                               |                                                          |
| PbpE              | 9.9               | endopeptidase                                                 | $\sigma^W$                                               |
| PspA <sup>1</sup> | 19.0              | unknown                                                       | $\sigma^W$ , AbrB                                        |
| PspA <sup>2</sup> | 18.6              |                                                               |                                                          |
| PspA <sup>3</sup> | 12.2              |                                                               |                                                          |
| SalA              | 3.6               | control of alkaline protease expression                       | SalA                                                     |
| SpeE              | 3.7               | spermidine/polyamine biosynthesis                             | $\sigma^A$                                               |
| TcyA              | 7.1               | cystein uptake                                                |                                                          |
| TrxB              | 3.6               | keeps thioredoxin in the reduced state                        | Spx                                                      |
| YaaQ              | 3.4               | unknown                                                       |                                                          |
| YbfO              | 24.5              | unknown                                                       | $\sigma^W$ , AbrB                                        |
| YceC              | 6.9               | unknown                                                       | $\sigma^B$ , $\sigma^M$ , $\sigma^W$ , $\sigma^X$        |
| YceH              | 7.7               | unknown                                                       | $\sigma^B$ , $\sigma^M$ , $\sigma^W$ , $\sigma^X$        |
| YdaG              | 3.2               | survival of stress conditions                                 | $\sigma^B$                                               |
| YdbD              | 4.0               | survival of ethanol stress                                    | $\sigma^B$                                               |
| Ydgl              | 4.2               | unknown                                                       |                                                          |
| YfhM              | 11.0              | survival of ethanol stress                                    | $\sigma^B$ , $\sigma^W$                                  |
| YhdN              | 10.2              | detoxification of methylglyoxal                               | $\sigma^B$ , FapR                                        |
| YhfE              | 2.8               | unknown                                                       |                                                          |
| YhfK              | 2.5               | unknown                                                       |                                                          |
| YknY              | 6.7               | resistance to SdpC toxin                                      | $\sigma^W$ , AbrB                                        |
| YqiG              | 3.7               | unknown                                                       |                                                          |
| YsnF              | 2.7               | survival of ethanol stress                                    | $\sigma^B$                                               |
| YuaE              | 3.5               | unknown                                                       |                                                          |
| YuaI              | 3.7               | unknown                                                       | $\sigma^W$                                               |
| YugJ              | 5.7               | unknown                                                       | Spx                                                      |
| YvgN              | 3.7               | unknown                                                       | $\sigma^B$ , SinR                                        |
| YviB <sup>1</sup> | 3.6               | unknown                                                       | $\sigma^W$                                               |
| YviB <sup>2</sup> | 2.9               |                                                               |                                                          |
| Ywfl              | 6.1               | lipoic acid metabolism                                        |                                                          |
| YwrO              | 3.0               | unknown                                                       |                                                          |

**Tab. S14 Marker proteins of CCCP. Part 1 of 2.** Given are averages of regulation factors of three independent biological replicates. Protein functions and regulation are taken from the SubtiWiki database<sup>1</sup>. Superscripts indicate that the protein was identified in multiple spots on the gel image (see Fig. S10).

| <b>protein</b>    | <b>regulation factor</b> | <b>function</b>                                             | <b>regulation</b>                            |
|-------------------|--------------------------|-------------------------------------------------------------|----------------------------------------------|
| AcuA              | 4.0                      | control of AcsA activity                                    | $\sigma^A$ , CcpA                            |
| Ald               | 7.5                      | alanine utilization                                         | $\sigma^A$ , AdeR                            |
| BglA              | 6.0                      | beta-glucoside utilization                                  |                                              |
| BglH              | 6.6                      | salicin utilization                                         | $\sigma^A$ , CcpA, LicT                      |
| Ctc               | 5.1                      | unknown                                                     | $\sigma^A$ , $\sigma^B$ , stringent response |
| Def               | 8.1                      | translation                                                 | $\sigma^A$                                   |
| Dps               | 3.8                      | iron storage; survival of stress conditions                 | $\sigma^B$                                   |
| EtfA              | 6.8                      | fatty acid degradation; calcium carbonate biomineralization | $\sigma^A$ , CcpA, FadR                      |
| EtfB              | 3.0                      | fatty acid degradation                                      | $\sigma^A$ , CcpA, FadR                      |
| FadR              | 3.8                      | regulation of fatty acid degradation                        | $\sigma^A$ , CcpA, FadR                      |
| FrlB              | 4.8                      | metabolism of aminoacylated fructose                        | $\sigma^A$ , CodY, FrlR                      |
| GsiB              | 5.7                      | response to water deficits                                  | $\sigma^B$ , $\sigma^I$                      |
| HisA              | 7.3                      | biosynthesis of histidine                                   |                                              |
| HisB              | 7.8                      | biosynthesis of histidine                                   |                                              |
| HisD              | 8.9                      | biosynthesis of histidine                                   |                                              |
| HisF              | 9.4                      | biosynthesis of histidine                                   |                                              |
| HisG              | 6.0                      | biosynthesis of histidine                                   |                                              |
| HisH <sup>1</sup> | 6.5                      | biosynthesis of histidine                                   |                                              |
| HisH <sup>2</sup> | 7.1                      | biosynthesis of histidine                                   |                                              |
| HisI              | 8.5                      | biosynthesis of histidine                                   |                                              |
| LpdV              | 6.6                      | utilization of branched-chain keto acids                    | $\sigma^L$ , BkdR, CodY                      |
| MelA              | 13.6                     | melibiose utilization                                       | $\sigma^A$ , CcpA                            |
| MetN              | 12.7                     | methionine uptake                                           | CodY, S-box                                  |
| MurF              | 5.4                      | peptidoglycan precursor biosynthesis                        | $\sigma^M$ , $\sigma^V$                      |
| NagBB             | 3.1                      | N-acetylglucosamine utilization                             | $\sigma^A$ , CcpA, NagR                      |
| NfrA              | 3.1                      | unknown                                                     | $\sigma^A$ , $\sigma^D$ , Spo0A, Spx         |
| OhrB              | 3.5                      | organic peroxide resistance                                 | $\sigma^B$                                   |
| RocA <sup>1</sup> | 9.2                      | arginine, ornithine and citrulline utilization              | $\sigma^L$ , AbrB, AhrC, CodY, RocR          |
| RocA <sup>2</sup> | 7.8                      |                                                             |                                              |
| RpsW              | 6.0                      | translation                                                 |                                              |
| SacA              | 5.4                      | utilization of sucrose                                      | $\sigma^A$ , CcpA, SacT                      |
| Tsf               | 7.5                      | translation                                                 | stringent response                           |
| TyrA              | 4.8                      | biosynthesis of tyrosine                                    | MtrB                                         |

**Tab. S15 Marker proteins of CCCP. Part 2 of 2.** Given are averages of regulation factors of three independent biological replicates. Protein functions and regulation are taken from the SubtiWiki database<sup>1</sup>. Superscripts indicate that the protein was identified in multiple spots on the gel image (see Fig. S10).

| protein           | regulation factor | function                                                                                 | regulation                                               |
|-------------------|-------------------|------------------------------------------------------------------------------------------|----------------------------------------------------------|
| YaaQ              | 6.3               | unknown                                                                                  |                                                          |
| YcsN              | 3.8               | unknown                                                                                  |                                                          |
| YdaE              | 4.5               | survival of ethanol stress and low temperatures                                          |                                                          |
| YdbD <sup>1</sup> | 3.0               | survival of ethanol stress                                                               | $\sigma^B$                                               |
| YdbD <sup>2</sup> | 7.6               |                                                                                          |                                                          |
| YerA              | 15.3              | unknown                                                                                  |                                                          |
| YezE              | 4.2               | unknown                                                                                  |                                                          |
| YfkM              | 3.2               | detoxification of methylglyoxal                                                          | $\sigma^B$ , Fur                                         |
| YhdF              | 6.9               | unknown                                                                                  | $\sigma^A$ , $\sigma^B$ , CitR                           |
| YhdN <sup>1</sup> | 4.6               | detoxification of methylglyoxal                                                          | $\sigma^B$ , FapR                                        |
| YhdN <sup>2</sup> | 8.0               |                                                                                          |                                                          |
| YjbC              | 2.3               | survival of paraquat stress                                                              | $\sigma^B$ , $\sigma^M$ , $\sigma^W$ , $\sigma^X$ , PerR |
| YocK              | 4.1               | survival of ethanol stress                                                               | $\sigma^B$                                               |
| YpfD              | 3.2               | unknown                                                                                  |                                                          |
| YrbE              | 8.0               | unknown                                                                                  |                                                          |
| YsiB              | 11.6              | fatty acid degradation                                                                   | $\sigma^A$ , CcpA, FadR                                  |
| YsnF              | 6.9               | survival of ethanol stress                                                               | $\sigma^B$                                               |
| YtxH              | 4.6               | unknown                                                                                  | $\sigma^B$ , $\sigma^H$                                  |
| YukJ              | 6.0               | unknown                                                                                  |                                                          |
| YvyD              | 14.5              | dimerization of ribosomes in the stationary phase;<br>protection against paraquat stress | $\sigma^B$ , $\sigma^D$ , $\sigma^H$ , PhoP              |
| YxaB              | 4.6               | biofilm formation; survival of salt and ethanol stress                                   | $\sigma^A$ , $\sigma^B$ , AbrB                           |
| YxbG              | 12.7              | unknown                                                                                  | $\sigma^B$                                               |

**Tab. S16 Marker proteins of cinnamaldehyde.** Given are averages of regulation factors of three independent biological replicates. Protein functions and regulation are taken from the SubtiWiki database<sup>1</sup>. Superscripts indicate that the protein was identified in multiple spots on the gel image (see Fig. S11).

| protein           | regulation factor | function                                            | regulation                                 |
|-------------------|-------------------|-----------------------------------------------------|--------------------------------------------|
| Cah               | 11.3              | resistance to cephalosporin C                       |                                            |
| ClpP              | 7.9               | protein degradation                                 | $\sigma^A$ , $\sigma^B$ , CtsR             |
| DnaK              | 7.6               | protein quality control                             | $\sigma^A$ , HrcA                          |
| FabG              | 3.0               | fatty acid biosynthesis                             | $\sigma^A$ , ComA, FapR                    |
| IolS              | 4.5               | unknown; may be involved in myo-inositol catabolism | $\sigma^A$ , IolR                          |
| LeuD              | 19.6              | biosynthesis of leucine                             | $\sigma^A$ , CcpA, Cody, FsrA, TnrA, T-box |
| NfrA              | 4.6               | unknown                                             | $\sigma^A$ , $\sigma^D$ , Spo0A, Spx       |
| PbpC <sup>1</sup> | 8.8               | unknown                                             |                                            |
| PbpC <sup>2</sup> | 13.3              |                                                     |                                            |
| PtsL              | 6.4               | PTS-dependent sugar transport                       | $\sigma^A$ , Glct, stringent response      |
| SalA              | 8.2               | control of alkaline protease expression             | SalA                                       |
| SodA              | 3.9               | detoxification of oxygen radicals                   | $\sigma^B$                                 |
| SuhB              | 12.3              | unknown                                             | $\sigma^B$                                 |
| ThrS <sup>1</sup> | 11.9              | translation                                         | $\sigma^A$ , T-box                         |
| ThrS <sup>2</sup> | 18.1              |                                                     |                                            |
| YaaE              | 3.9               | pyridoxal-5-phosphate biosynthesis                  | Spo0A                                      |
| YjdA              | 4.5               | unknown                                             |                                            |
| YqiG              | 9.1               | unknown                                             |                                            |
| YugJ              | 5.6               | unknown                                             | Spx                                        |

**Tab. S17 Marker proteins of ciprofloxacin.** Given are averages of regulation factors of three independent biological replicates. Protein functions and regulation are taken from the SubtiWiki database<sup>1</sup>.

| protein | regulation factor | function                                                                                                 | regulation                                              |
|---------|-------------------|----------------------------------------------------------------------------------------------------------|---------------------------------------------------------|
| Apt     | 5.4               | purine salvage and interconversion                                                                       | stringent response                                      |
| Ctc     | 7.9               | unknown                                                                                                  | $\sigma^A$ , $\sigma^B$ , stringent response            |
| DinB    | 12.4              | response to DNA damage                                                                                   | LexA                                                    |
| DnaC    | 2.5               | DNA replication                                                                                          |                                                         |
| EfeM    | 9.5               | elemental iron uptake                                                                                    | $\sigma^A$ , $\sigma^M$ , $\sigma^W$ , $\sigma^X$ , Fur |
| Fur     | 5.0               | regulation of iron homeostasis                                                                           | $\sigma^A$ , PerR                                       |
| GreA    | 6.0               | transcription elongation                                                                                 |                                                         |
| GspA    | 4.5               | unknown                                                                                                  | $\sigma^B$                                              |
| GtaB    | 2.8               | biosynthesis of teichoic acid                                                                            | $\sigma^A$ , $\sigma^B$                                 |
| OhrB    | 3.3               | organic peroxide resistance                                                                              | $\sigma^B$                                              |
| Pgm     | 2.3               | enzyme in glycolysis/gluconeogenesis                                                                     | $\sigma^A$ , CggR                                       |
| PurH    | 2.2               | purine biosynthesis                                                                                      | $\sigma^A$ , PurR, G-box                                |
| RsbW    | 4.2               | control of $\sigma^B$ activity                                                                           | $\sigma^A$ , $\sigma^B$ , CcpA                          |
| ThiE    | 2.9               | biosynthesis of thiamine by 4-methyl-5-(beta-hydroxyethyl)thiazole phosphate to yield thiamine phosphate | $\sigma^A$                                              |
| YceD    | 46.2              | required for survival of ethanol stress                                                                  | $\sigma^B$ , $\sigma^M$ , $\sigma^W$ , $\sigma^X$       |
| YdaD    | 6.0               | unknown                                                                                                  | $\sigma^B$                                              |
| YdaG    | 5.0               | survival of stress conditions                                                                            | $\sigma^B$                                              |
| Yeel    | 4.6               | unknown                                                                                                  |                                                         |
| YfhH    | 2.7               | unknown                                                                                                  |                                                         |
| YlbN    | 3.9               | accumulation of 23S rRNA                                                                                 | stringent response                                      |
| YsnA    | 2.8               | purine metabolism                                                                                        |                                                         |
| YtxH    | 4.1               | unknown                                                                                                  | $\sigma^B$ , $\sigma^H$                                 |
| YtzG    | 2.6               | 16s rRNA modification                                                                                    |                                                         |
| YugI    | 3.1               | unknown                                                                                                  | stringent response                                      |
| YugK    | 14.8              | unknown                                                                                                  |                                                         |
| YvaK    | 2.3               | unknown                                                                                                  | $\sigma^B$                                              |
| YvyD    | 7.8               | dimerization of ribosomes in the stationary phase; protection against paraquat stress                    | $\sigma^B$ , $\sigma^D$ , $\sigma^H$ , PhoP             |
| YwqK    | 5.3               | unknown                                                                                                  |                                                         |

**Tab. S18 Marker proteins of closthioamide.** Given are averages of regulation factors of three independent biological replicates. Protein functions and regulation are taken from the SubtiWiki database<sup>1</sup>. Superscripts indicate that the protein was identified in multiple spots on the gel image (see Fig. S13).

| protein           | regulation factor | function                                                                                                 | regulation                                  |
|-------------------|-------------------|----------------------------------------------------------------------------------------------------------|---------------------------------------------|
| ArgS              | 5.5               | translation                                                                                              |                                             |
| AzoR2             | 5.0               | resistance to 2-methylhydroquinone                                                                       | $\sigma^A$ , $\sigma^G$ , MhqR              |
| GbsB <sup>1</sup> | 5.9               | osmoprotection                                                                                           | $\sigma^A$ , GbsR                           |
| GbsB <sup>2</sup> | 3.9               |                                                                                                          |                                             |
| GlpX              | 2.3               | gluconeogenesis                                                                                          |                                             |
| GltX              | 4.9               | translation                                                                                              | $\sigma^A$ , T-box                          |
| GuaA              | 5.4               | biosynthesis of GMP                                                                                      | $\sigma^A$                                  |
| IlvE              | 9.9               | biosynthesis of branched-chain amino acids                                                               | CodY                                        |
| Maf               | 4.2               | cell division control                                                                                    | $\sigma^A$ , $\sigma^M$ , $\sigma^V$ , ComK |
| MenB              | 3.8               | biosynthesis of menaquinone                                                                              | $\sigma^A$                                  |
| MhqO              | 4.0               | resistance to methyl-hydroxyquinone                                                                      | $\sigma^A$ , $\sigma^B$ , MhqR              |
| MnaA              | 3.0               | biosynthesis of teichoic acid                                                                            |                                             |
| MrgA              | 11.0              | iron storage                                                                                             | $\sigma^A$ , PerR                           |
| MtnK              | 2.9               | methionine salvage                                                                                       | $\sigma^A$ , S-box                          |
| MurD              | 3.8               | peptidoglycan precursor biosynthesis                                                                     | $\sigma^E$ , SpoIIID, stringent response    |
| MurQ              | 5.8               | cell wall turnover                                                                                       |                                             |
| NdoA              | 3.1               | unknown                                                                                                  |                                             |
| OhrA              | 8.6               | organic peroxide resistance                                                                              | $\sigma^A$ , OhrR                           |
| PatA              | 2.7               | biosynthesis of lysine and peptidoglycan                                                                 |                                             |
| PckA              | 5.2               | synthesis of phosphoenolpyruvate                                                                         | $\sigma^A$ , CcpN                           |
| ProS              | 9.9               | translation                                                                                              |                                             |
| PurA              | 5.2               | purine biosynthesis                                                                                      | $\sigma^A$ , PurR                           |
| PurM              | 3.5               | purine biosynthesis                                                                                      | $\sigma^A$ , PurR, G-Box                    |
| RapG              | 4.5               | control of DegU activity                                                                                 | $\sigma^A$ , $\sigma^H$ , CcpA, RghR, SinR  |
| RibE              | 17.3              | riboflavin biosynthesis                                                                                  | $\sigma^A$ , FMN-box                        |
| ThiE              | 2.6               | biosynthesis of thiamine by 4-methyl-5-(beta-hydroxyethyl)thiazole phosphate to yield thiamine phosphate | $\sigma^A$                                  |
| ThiQ              | 3.1               | unknown                                                                                                  | $\sigma^E$ , SpoIIID                        |
| YcnD              | 10.2              | delivery of FMN to enzymes                                                                               |                                             |
| YcnE              | 8.4               | unknown                                                                                                  |                                             |
| Ydgl              | 2.8               | unknown                                                                                                  |                                             |
| YsnF              | 3.4               | survival of ethanol stress                                                                               | $\sigma^B$                                  |
| YhdN              | 5.1               | detoxification of methylglyoxal                                                                          | $\sigma^B$ , FapR                           |
| YopQ              | 3.8               | unknown                                                                                                  |                                             |
| YopX              | 19.0              | unknown                                                                                                  |                                             |
| YorG              | 6.6               | unknown                                                                                                  |                                             |
| YtsJ              | 4.4               | malate utilization                                                                                       | LexA                                        |
| YtxJ              | 5.5               | unknown                                                                                                  | $\sigma^B$ , $\sigma^H$                     |
| YxjG              | 3.9               | unknown                                                                                                  | S-box                                       |

**Tab. S19 Marker proteins of cXRX.** Given are averages of regulation factors of three independent biological replicates. Protein functions and regulation are taken from the SubtiWiki database<sup>1</sup>.

| <b>protein</b> | <b>regulation factor</b> | <b>function</b>                                                                     | <b>regulation</b>                                                                    |
|----------------|--------------------------|-------------------------------------------------------------------------------------|--------------------------------------------------------------------------------------|
| CitZ           | 2.6                      | TCA cycle                                                                           | $\sigma^A$ , CcpA, CcpC, CitB                                                        |
| ClpC           | 2.6                      | protein degradation; positive regulator of autolysin synthesis                      | $\sigma^A$ , $\sigma^B$ , $\sigma^F$ , $\sigma^M$ , CtsR                             |
| ClpP           | 3.4                      | protein degradation                                                                 | $\sigma^A$ , $\sigma^B$ , CtsR                                                       |
| DltA           | 3.6                      | biosynthesis of teichoic acid                                                       | $\sigma^D$ , $\sigma^M$ , $\sigma^V$ , $\sigma^X$ , Spo0A, YvrHB, stringent response |
| FosB           | 3.8                      | confers resistance against antimicrobial compounds from <i>B. amyloliquefaciens</i> | $\sigma^W$                                                                           |
| GlpK           | 2.5                      | glycerol utilization                                                                | $\sigma^A$ , AbrB, CcpA, GlpP, ResD                                                  |
| GroEL          | 3.9                      | protein folding and re-folding                                                      | $\sigma^A$ , HrcA                                                                    |
| GsiB           | 5.1                      | response to water deficits                                                          | $\sigma^B$ , $\sigma^I$                                                              |
| NadE           | 4.4                      | NAD biosynthesis                                                                    | $\sigma^A$ , $\sigma^B$                                                              |
| PspA           | 3.9                      | unknown                                                                             | $\sigma^W$ , AbrB                                                                    |
| RacX           | 2.8                      | production of non-canonical D-amino acids                                           | $\sigma^W$                                                                           |
| Tpx            | 3.2                      | unknown                                                                             | Spx                                                                                  |
| YceC           | 3.0                      | unknown                                                                             | $\sigma^B$ , $\sigma^M$ , $\sigma^W$ , $\sigma^X$                                    |
| YdbD           | 2.6                      | survival of ethanol stress                                                          | $\sigma^B$                                                                           |
| YjdA           | 2.6                      | unknown                                                                             |                                                                                      |
| YoxD           | 3.0                      | unknown                                                                             |                                                                                      |
| YpuA           | 4.0                      | unknown                                                                             | $\sigma^M$                                                                           |
| YvlB           | 3.2                      | unknown                                                                             | $\sigma^W$                                                                           |
| YxaB           | 4.2                      | biofilm formation; survival of salt and ethanol stress                              | $\sigma^A$ , $\sigma^B$ , AbrB                                                       |

**Tab. S20 Marker proteins of 5% DMSO.** Given are averages of regulation factors of three independent biological replicates. Protein functions and regulation are taken from the SubtiWiki database<sup>1</sup>. Superscripts indicate that the protein was identified in multiple spots on the gel image (see Fig. S15).

| protein           | regulation factor | function                                                       | regulation                                               |
|-------------------|-------------------|----------------------------------------------------------------|----------------------------------------------------------|
| Adk               | 12.7              | ADP formation                                                  | $\sigma^A$ , stringent response                          |
| ClpC              | 3.2               | protein degradation; positive regulator of autolysin synthesis | $\sigma^A$ , $\sigma^B$ , $\sigma^F$ , $\sigma^M$ , CtsR |
| ClpP              | 2.7               | protein degradation                                            | $\sigma^A$ , $\sigma^B$ , CtsR                           |
| DapA <sup>1</sup> | 10.0              | biosynthesis of lysine and peptidoglycan                       | $\sigma^A$ , $\sigma^{KN}$                               |
| DapA <sup>2</sup> | 21.0              |                                                                |                                                          |
| Dps <sup>1</sup>  | 3.9               |                                                                |                                                          |
| Dps <sup>2</sup>  | 6.0               | iron storage; survival of stress conditions                    | $\sigma^B$                                               |
| Dps <sup>3</sup>  | 6.9               |                                                                |                                                          |
| FbaA <sup>1</sup> | 4.9               |                                                                |                                                          |
| FbaA <sup>2</sup> | 4.3               | enzyme in glycolysis/gluconeogenesis                           |                                                          |
| FbaA <sup>3</sup> | 16.5              |                                                                |                                                          |
| GreA              | 6.3               |                                                                |                                                          |
| GrpE              | 2.5               | control of DnaK activity                                       | $\sigma^A$ , HrcA                                        |
| GtaB <sup>1</sup> | 51.0              | biosynthesis of teichoic acid                                  | $\sigma^A$ , $\sigma^B$                                  |
| GtaB <sup>2</sup> | 21.0              |                                                                |                                                          |
| GtaB <sup>3</sup> | 16.5              |                                                                |                                                          |
| IleS              | 3.8               | translation                                                    | T-box                                                    |
| IlvD              | 18.0              | biosynthesis of branched-chain amino acids                     | CodY                                                     |
| KatE              | 8.8               | detoxification of hydrogen peroxide                            | $\sigma^B$                                               |
| MalS              | 11.2              | malate utilization                                             |                                                          |
| MetE              | 6.5               | biosynthesis of methionine                                     | S-box                                                    |
| OhrB              | 11.9              | organic peroxide resistance                                    | $\sigma^B$                                               |
| RpsC              | 7.4               | translation                                                    | $\sigma^A$ , stringent response                          |
| RsbW              | 4.0               | control of $\sigma^B$ activity                                 | $\sigma^A$ , $\sigma^B$ , CcpA                           |
| Sat               | 20.0              | sulfate activation                                             | $\sigma^A$ , CymR, S-box                                 |
| ThiD              | 21.0              | biosynthesis of thiamine pyrophosphate                         | Thi-box                                                  |
| ThyA              | 4.9               | biosynthesis of thymidine nucleotides                          |                                                          |
| YcdF              | 8.6               | survival of ethanol stress and at low temperatures             | $\sigma^B$                                               |
| YceE              | 12.7              | survival of ethanol stress and at low temperatures             | $\sigma^B$ , $\sigma^M$ , $\sigma^W$ , $\sigma^X$        |
| YdaD              | 5.7               | unknown                                                        |                                                          |
| YdaE              | 29.3              | survival of ethanol stress and at low temperatures             | $\sigma^B$                                               |
| Yeel              | 4.7               | unknown                                                        |                                                          |
| YfkM <sup>1</sup> | 9.4               | detoxification of methylglyoxal                                | $\sigma^B$ , Fur                                         |
| YfkM <sup>2</sup> | 7.0               |                                                                |                                                          |
| YhdF              | 22.3              | unknown                                                        | $\sigma^A$ , $\sigma^B$ , CitR                           |
| YloC              | 21.0              | unknown                                                        | $\sigma^F$                                               |
| YpfD <sup>1</sup> | 12.4              | unknown                                                        |                                                          |
| YpfD <sup>2</sup> | 16.7              |                                                                |                                                          |
| YsnF <sup>1</sup> | 20.4              |                                                                |                                                          |
| YsnF <sup>2</sup> | 20.0              | survival of ethanol stress                                     | $\sigma^B$                                               |
| YsnF <sup>3</sup> | 28.8              |                                                                |                                                          |
| YsnF <sup>4</sup> | 25.2              |                                                                |                                                          |
| YtxH              | 5.4               | unknown                                                        | $\sigma^B$ , $\sigma^H$                                  |
| YvgN              | 16.5              | unknown                                                        | $\sigma^B$ , SinR                                        |
| YvrE              | 5.8               | survival of salt stress                                        | $\sigma^B$                                               |
| YxaB <sup>1</sup> | 18.2              | biofilm formation; survival of salt and ethanol stress         | $\sigma^A$ , $\sigma^B$ , AbrB                           |
| YxaB <sup>2</sup> | 12.4              |                                                                |                                                          |



**Tab. S21 Marker proteins of GE2270A.** Given are averages of regulation factors of three independent biological replicates. Protein functions and regulation are taken from the SubtiWiki database<sup>1</sup>.

| protein | regulation factor | function                                 | regulation       |
|---------|-------------------|------------------------------------------|------------------|
| CheV    | 2.7               | control of CheA activity                 | $\sigma^D$       |
| Nfo     | 2.2               | repair of oxidative DNA damage in spores | $\sigma^G$       |
| QueF    | 2.5               | tRNA modification                        | preQ1 riboswitch |

**Tab. S22 Marker proteins of kirromycin.** Given are averages of regulation factors of three independent biological replicates. Protein functions and regulation are taken from the SubtiWiki database<sup>1</sup>. Superscripts indicate that the protein was identified in multiple spots on the gel image (see Fig. S17).

| protein           | regulation factor | function                                             | regulation                                            |
|-------------------|-------------------|------------------------------------------------------|-------------------------------------------------------|
| ClpC <sup>1</sup> | 40.6              | protein degradation, positive regulator of autolysin | $\sigma^A, \sigma^B, \sigma^F, \sigma^M, \text{CtsR}$ |
| ClpC <sup>2</sup> | 8.6               | synthesis                                            |                                                       |
| ClpP              | 3.4               | protein degradation                                  | $\sigma^A, \sigma^B, \text{CtsR}$                     |
| DnaK              | 2.4               | protein quality control                              | $\sigma^A, \text{HrcA}$                               |
| GrpE              | 2.9               | control of DnaK activity                             | $\sigma^A, \text{HrcA}$                               |
| GuaC              | 21.5              | purine salvage and interconversion                   | CodY, PurR                                            |
| HemH              | 2.4               | biosynthesis of heme                                 |                                                       |
| PyrAB             | 3.4               | pyrimidine biosynthesis                              | $\sigma^A, \text{PyrR}$                               |
| Ydgl              | 3.0               | unknown                                              |                                                       |
| YhcB              | 22.6              | unknown                                              |                                                       |
| YojG              | 2.3               | biosynthesis of bacillithiol                         | $\sigma^A, \text{Spx}$                                |
| YvIB              | 2.1               | unknown                                              | $\sigma^W$                                            |

**Tab. S23 Marker proteins of kirrothricin C.** Given are averages of regulation factors of three independent biological replicates. Protein functions and regulation are taken from the SubtiWiki database<sup>1</sup>.

| protein | regulation factor | function                                                       | regulation                                            |
|---------|-------------------|----------------------------------------------------------------|-------------------------------------------------------|
| ClpC    | 11.5              | protein degradation, positive regulator of autolysin           | $\sigma^A, \sigma^B, \sigma^F, \sigma^M, \text{CtsR}$ |
|         |                   | synthesis                                                      |                                                       |
| DnaK    | 2.0               | protein quality control                                        | $\sigma^A, \text{HrcA}$                               |
| GroEL   | 4.8               | protein folding and re-folding                                 | $\sigma^A, \text{HrcA}$                               |
| GroES   | 5.3               | protein folding and re-folding                                 | $\sigma^A, \text{HrcA}$                               |
| GsiB    | 13.7              | response to water deficits                                     | $\sigma^B, \sigma^I$                                  |
| GtaB    | 11.6              | biosynthesis of teichoic acid                                  | $\sigma^A, \sigma^B$                                  |
| PtsH    | 11.8              | PTS-dependent sugar transport and carbon catabolite repression | $\sigma^A, \text{GlcT, stringent response}$           |
| TrxA    | 4.4               | protection of proteins against oxidative damage                | $\sigma^A, \sigma^B, \text{CtsR, Spx}$                |
| Ydgl    | 20.0              | unknown                                                        |                                                       |
| YuaE    | 20.0              | unknown                                                        |                                                       |

**Tab. S24 Marker proteins of KKL-35.** Given are averages of regulation factors of three independent biological replicates. Protein functions and regulation are taken from the SubtiWiki database<sup>1</sup>. Superscripts indicate that the protein was identified in multiple spots on the gel image (see Fig. S19).

| <b>protein</b>    | <b>regulation factor</b> | <b>function</b>                                                                          | <b>regulation</b>                           |
|-------------------|--------------------------|------------------------------------------------------------------------------------------|---------------------------------------------|
| AhpC <sup>1</sup> | 5.9                      | resistance against peroxide stress                                                       | $\sigma^A$ , PerR                           |
| AhpC <sup>2</sup> | 8.1                      |                                                                                          |                                             |
| AhpF <sup>1</sup> | 8.8                      | resistance against peroxide stress                                                       | $\sigma^A$ , PerR                           |
| AhpF <sup>2</sup> | 8.8                      |                                                                                          |                                             |
| AhpF <sup>3</sup> | 5.5                      |                                                                                          |                                             |
| AhpF <sup>4</sup> | 4.8                      |                                                                                          |                                             |
| BrxA              | 19.1                     | de-bacillithiolation of S-bacillithiolated OhrR and MetE                                 |                                             |
| DhbA              | 14.1                     | biosynthesis of the siderophore bacillibactin                                            | $\sigma^A$ , AbrB, Fur, Kre                 |
| Fur               | 4.0                      | regulation of iron homeostasis                                                           | $\sigma^A$ , Fur, PerR                      |
| GuaB              | 3.5                      | biosynthesis of GMP                                                                      | CodY                                        |
| HisA              | 12.1                     | biosynthesis of histidine                                                                |                                             |
| HisG              | 5.3                      | biosynthesis of histidine                                                                |                                             |
| IscU              | 23.1                     | transfer of sulfur from SufS to SufB                                                     | $\sigma^A$                                  |
| KatA <sup>1</sup> | 87.8                     | detoxification (degradation) of hydrogen peroxide                                        | PerR                                        |
| KatA <sup>2</sup> | 24.1                     |                                                                                          |                                             |
| KatA <sup>3</sup> | 17.1                     |                                                                                          |                                             |
| MrgA              | 14.3                     | iron storage                                                                             | $\sigma^A$ , PerR                           |
| NfrA              | 3.8                      | unknown                                                                                  | $\sigma^A$ , $\sigma^D$ , Spo0A, Spx        |
| SufD              | 2.6                      | synthesis of Fe-S-clusters                                                               | $\sigma^A$                                  |
| Tpx               | 7.1                      | unknown                                                                                  | Spx                                         |
| TrxA              | 5.1                      | protection of proteins against oxidative damage                                          | $\sigma^A$ , $\sigma^B$ , CtsR, Spx         |
| YcsN              | 3.7                      | unknown                                                                                  |                                             |
| YhzC              | 195.0                    | unknown                                                                                  |                                             |
| YukJ              | 4.9                      | unknown                                                                                  |                                             |
| YvyD              | 9.3                      | dimerization of ribosomes in the stationary phase;<br>protection against paraquat stress | $\sigma^B$ , $\sigma^D$ , $\sigma^H$ , PhoP |
| YwrO              | 2.8                      | unknown                                                                                  |                                             |

**Tab. S25 Marker proteins of KKL-40.** Given are averages of regulation factors of three independent biological replicates. Protein functions and regulation are taken from the SubtiWiki database<sup>1</sup>. Superscripts indicate that the protein was identified in multiple spots on the gel image (see Fig. S20).

| protein           | regulation factor | function                                                                              | regulation                                   |
|-------------------|-------------------|---------------------------------------------------------------------------------------|----------------------------------------------|
| AhpC <sup>1</sup> | 5.8               | resistance against peroxide stress                                                    | $\sigma^A$ , PerR                            |
| AhpC <sup>2</sup> | 9.9               |                                                                                       |                                              |
| AhpF <sup>1</sup> | 7.1               | resistance against peroxide stress                                                    | $\sigma^A$ , PerR                            |
| AhpF <sup>2</sup> | 7.0               |                                                                                       |                                              |
| AhpF <sup>3</sup> | 5.0               |                                                                                       |                                              |
| BrxA              | 20.6              | de-bacillithiolation of S-bacillithiolated OhrR and MetE                              |                                              |
| Ctc               | 3.6               | unknown                                                                               | $\sigma^A$ , $\sigma^B$ , stringent response |
| GreA              | 7.0               | transcription elongation                                                              |                                              |
| HisA              | 10.5              | biosynthesis of histidine                                                             |                                              |
| HisG              | 5.9               | biosynthesis of histidine                                                             |                                              |
| IscU              | 26.3              | transfer of sulfur from SufS to SufB                                                  |                                              |
| MrgA              | 22.5              | iron storage                                                                          | $\sigma^A$ , PerR                            |
| NfrA              | 3.2               | unknown                                                                               | $\sigma^A$ , $\sigma^D$ , Spo0A, Spx         |
| OhrB              | 3.6               | organic peroxide resistance                                                           | $\sigma^A$                                   |
| TrxA              | 5.6               | protection of proteins against oxidative damage                                       | $\sigma^A$ , $\sigma^B$ , CtsR, Spx          |
| YfkM              | 2.4               | detoxification of methylglyoxal                                                       | $\sigma^B$ , Fur                             |
| YhzC              | 170.2             | unknown                                                                               |                                              |
| YtpR              | 5.2               | unknown                                                                               | $\sigma^A$ , Spx                             |
| YtxH              | 14.2              | unknown                                                                               | $\sigma^B$ , $\sigma^H$                      |
| YvyD              | 12.6              | dimerization of ribosomes in the stationary phase; protection against paraquat stress | $\sigma^B$ , $\sigma^D$ , $\sigma^H$ , PhoP  |

**Tab. S26 Marker proteins of KKL-55.** Given are averages of regulation factors of three independent biological replicates. Protein functions and regulation are taken from the SubtiWiki database<sup>1</sup>. Superscripts indicate that the protein was identified in multiple spots on the gel image (see Fig. S21).

| protein            | regulation factor | function                                      | regulation                                 |
|--------------------|-------------------|-----------------------------------------------|--------------------------------------------|
| AhpC               | 4.8               | resistance against peroxide stress            | $\sigma^A$ , PerR                          |
| AhpF               | 4.2               | resistance against peroxide stress            | $\sigma^A$ , PerR                          |
| AzoR1              | 4.3               | quinone detoxification                        | YodB                                       |
| ClpP               | 5.0               | protein degradation                           | $\sigma^A$ , $\sigma^B$ , CtsR             |
| DhbA               | 4.8               | biosynthesis of the siderophore bacillibactin | $\sigma^A$ , $\sigma^I$ , AbrB, Fur, Kre   |
| DhbB               | 14.2              | biosynthesis of the siderophore bacillibactin | $\sigma^A$ , $\sigma^I$ , AbrB, Fur, Kre   |
| FlgK               | 6.2               | motility and chemotaxis                       | $\sigma^A$ , $\sigma^D$ , ComK, DegU, ScoC |
| GroEL <sup>1</sup> | 4.2               | protein folding and re-folding                | $\sigma^A$ , HrcA                          |
| GroEL <sup>2</sup> | 7.4               |                                               |                                            |
| KatA               | 37.0              | detoxification of hydrogen peroxide           | PerR                                       |
| NagB               | 4.8               | N-acetylglucosamine utilization               | $\sigma^A$ , CcpA, NagR                    |
| PepF               | 3.1               | protein degradation                           |                                            |
| TenA               | 2.6               | thiamine salvage                              | Thi-box                                    |
| YcnD               | 6.0               | delivery of FMN to enzymes                    |                                            |
| YhjG               | 5.1               | unknown                                       |                                            |
| YneT               | 99.8              | unknown                                       |                                            |
| YqiG               | 6.7               | unknown                                       |                                            |
| YugJ               | 4.7               | unknown                                       | Spx                                        |
| YwrO               | 2.9               | unknown                                       |                                            |

**Tab. S27 Marker proteins of linezolid.** Given are averages of regulation factors of three independent biological replicates. Protein functions and regulation are taken from the SubtiWiki database<sup>1</sup>.

| protein           | regulation factor | function                                                                                                 | regulation                                        |
|-------------------|-------------------|----------------------------------------------------------------------------------------------------------|---------------------------------------------------|
| Adk               | 7.0               | ADP formation                                                                                            | $\sigma^A$ , stringent response                   |
| CcpA              | 2.8               | carbon catabolite repression (CCR)                                                                       | $\sigma^A$                                        |
| CodY              | 13.1              | regulation of a large regulon in response to branched-chain amino acid limitation                        | $\sigma^A$ , CodY                                 |
| CspR              | 3.3               | translation                                                                                              | $\sigma^E$                                        |
| CwlO              | 3.5               | cell wall synthesis; cell elongation                                                                     | $\sigma^A$ , WalR                                 |
| Fur               | 4.1               | regulation of iron homeostasis                                                                           | $\sigma^A$ , PerR                                 |
| HslO              | 7.0               | unknown                                                                                                  | $\sigma^M$                                        |
| IolS              | 3.4               | unknown; maybe involved in myo-inositol catabolism                                                       | $\sigma^A$ , IolR                                 |
| MnaA              | 3.6               | biosynthesis of teichoic acid                                                                            |                                                   |
| NusG              | 3.4               | transcription                                                                                            |                                                   |
| PrfB              | 7.8               | translation                                                                                              | $\sigma^A$                                        |
| PurC              | 13.1              | purine biosynthesis                                                                                      | $\sigma^A$ , PurR, G-box                          |
| PyrB              | 2.5               | pyrimidine biosynthesis                                                                                  | $\sigma^A$ , PyrR                                 |
| PyrC              | 3.4               | pyrimidine biosynthesis                                                                                  | $\sigma^A$ , PyrR                                 |
| RplJ              | 3.7               | translation                                                                                              | RplJ, RplL, stringent response                    |
| RpsF <sup>1</sup> | 2.9               | translation                                                                                              | $\sigma^A$ , ComK, stringent response             |
| RpsF <sup>2</sup> | 3.3               |                                                                                                          |                                                   |
| SpeB              | 3.0               | spermidine; polyamine biosynthesis                                                                       | $\sigma^A$                                        |
| SsbA              | 5.0               | DNA replication, DNA repair/recombination                                                                | $\sigma^A$ , ComK, stringent response             |
| SucD              | 3.1               | TCA cycle                                                                                                | CcpA                                              |
| TagD              | 3.0               | biosynthesis of teichoic acid                                                                            | $\sigma^A$ , PhoP, WalR                           |
| TasA              | 2.6               | biofilm formation                                                                                        | $\sigma^A$ , AbrB, LutR, RemA, SinR               |
| TrmK              | 5.4               | tRNA modification                                                                                        |                                                   |
| TrxB              | 3.2               | keeps TrxA in reduced state                                                                              | Spx                                               |
| YceE              | 2.2               | required for survival of ethanol stress and at low temperatures                                          | $\sigma^B$ , $\sigma^M$ , $\sigma^W$ , $\sigma^X$ |
| YfmS              | 3.0               | control of chemotaxis                                                                                    | $\sigma^D$                                        |
| YfmT              | 2.9               | unknown                                                                                                  | $\sigma^D$                                        |
| YjcJ              | 2.6               | biosynthesis of methionine                                                                               | $\sigma^A$ , S-box                                |
| YlbN              | 2.4               | accumulation of 23S rRNA                                                                                 | stringent response                                |
| YocH              | 2.4               | cell wall turnover                                                                                       | $\sigma^A$ , AbrB, Spo0A, WalR                    |
| YutI              | 4.6               | unknown                                                                                                  |                                                   |
| YwtE              | 6.0               | dephosphorylation of riboflavin precursor; 5-amino-6-ribitylamino-2,3(1H,3)-pyrimidinedione 5'-phosphate |                                                   |

**Tab. S28 Marker proteins of monensin.** Given are averages of regulation factors of three independent biological replicates. Protein functions and regulation are taken from the SubtiWiki database<sup>1</sup>.

| <b>protein</b> | <b>regulation factor</b> | <b>function</b>                                    | <b>regulation</b>                                 |
|----------------|--------------------------|----------------------------------------------------|---------------------------------------------------|
| AspS           | 2.2                      | translation                                        | T-box                                             |
| CysK           | 3.8                      | biosynthesis of cysteine; control of CymR activity | $\sigma^A$ , CymR, Spx                            |
| FolD           | 5.7                      | formylation of Met-tRNA                            | PurR, stringent response                          |
| GuaB           | 3.2                      | biosynthesis of GMP                                | CodY                                              |
| GudB           | 4.4                      | glutamate utilization; control of GltC activity    | $\sigma^A$                                        |
| HemK           | 2.8                      | heme biosynthesis                                  | $\sigma^A$ , PerR                                 |
| HisF           | 4.6                      | biosynthesis of histidine                          |                                                   |
| HisI           | 5.0                      | biosynthesis of histidine                          |                                                   |
| HisZ           | 5.3                      | translation                                        |                                                   |
| IlvD           | 3.7                      | biosynthesis of branched-chain amino acids         | CodY                                              |
| KtrC           | 6.6                      | potassium uptake                                   | $\sigma^A$ , Spo0A                                |
| LuxS           | 2.8                      | methionine salvage                                 | $\sigma^B$                                        |
| MetC           | 5.0                      | biosynthesis of methionine                         | $\sigma^A$ , S-box                                |
| PatA           | 4.1                      | biosynthesis of lysine and peptidoglycan           |                                                   |
| SpoVC          | 2.9                      | spore coat formation                               | $\sigma^A$ , $\sigma^B$ , stringent response      |
| TyrZ           | 3.3                      | translation                                        |                                                   |
| YaaD           | 3.9                      | pyridoxal-5-phosphate biosynthesis                 | Spo0A                                             |
| YceC           | 2.9                      | unknown                                            | $\sigma^B$ , $\sigma^M$ , $\sigma^W$ , $\sigma^X$ |
| YceH           | 2.6                      | unknown                                            | $\sigma^B$ , $\sigma^M$ , $\sigma^W$ , $\sigma^X$ |
| YdjE           | 4.5                      | utilization of sucrose and glucitol                |                                                   |
| YfmS           | 3.5                      | control of chemotaxis                              | $\sigma^D$                                        |
| YhcB           | 5.8                      | unknown                                            |                                                   |
| YjbL           | 3.3                      | unknown                                            |                                                   |
| YkuU           | 4.3                      | protection against peroxide stress                 | AbrB                                              |
| YqeY           | 4.9                      | unknown                                            |                                                   |
| YqhK           | 3.1                      | glycine utilization                                | Gly-box                                           |
| YtiB           | 2.5                      | unknown                                            | $\sigma^B$                                        |
| YuaE           | 5.6                      | unknown                                            |                                                   |
| Ywfl           | 3.7                      | biosynthesis of heme                               |                                                   |
| YwjH           | 3.7                      | pentose phosphate pathway                          |                                                   |
| YwIF           | 6.6                      | pentose phosphate pathway                          | TnrA                                              |

**Tab. S29 Marker proteins of L-MP66.** Given are averages of regulation factors of three independent biological replicates. Protein functions and regulation are taken from the SubtiWiki database<sup>1</sup>.

| protein | regulation factor | function                                                      | regulation                                                                        |
|---------|-------------------|---------------------------------------------------------------|-----------------------------------------------------------------------------------|
| AzoR2   | 7.5               | resistance to 2-methylhydroquinone                            | $\sigma^A, \sigma^G, \text{MhqR}$                                                 |
| DitA    | 3.5               | biosynthesis of teichoic acid                                 | $\sigma^D, \sigma^M, \sigma^X, \sigma^V, \text{Spo0A, YvrHb, stringent response}$ |
| FabF    | 4.0               | fatty acid biosynthesis                                       | $\sigma^A, \sigma^W, \text{FapR}$                                                 |
| GsiB    | 2.4               | response to water deficits                                    | $\sigma^B, \sigma^I$                                                              |
| LiaH    | 72.2              | resistance against oxidative stress and cell wall antibiotics | $\sigma^A, \text{LiaR}$                                                           |
| NadE    | 4.0               | NAD biosynthesis                                              | $\sigma^A, \sigma^B$                                                              |
| NfrA    | 5.3               | unknown                                                       | $\sigma^A, \sigma^D, \text{Spo0A, Spx}$                                           |
| PspA    | 7.3               | unknown                                                       | $\sigma^W, \text{AbrB}$                                                           |
| Spo0M   | 3.2               | sporulation                                                   | $\sigma^H, \sigma^W$                                                              |
| TufA    | 3.3               | translation                                                   | stringent response                                                                |
| YceC    | 6.6               | unknown                                                       | $\sigma^B, \sigma^M, \sigma^W, \sigma^X$                                          |
| YhdN    | 2.4               | detoxification of methylglyoxal                               | $\sigma^B, \text{FapR}$                                                           |
| YjdA    | 2.8               | unknown                                                       |                                                                                   |
| YoxD    | 2.7               | unknown                                                       |                                                                                   |
| YqiW    | 3.2               | de-bacillithiolation of S-bacillithiolated OhrR and MetE      |                                                                                   |
| YqkF    | 2.8               | unknown                                                       | $\sigma^E$                                                                        |
| YuaI    | 2.7               | unknown                                                       | $\sigma^W$                                                                        |
| YwrO    | 2.8               | unknown                                                       |                                                                                   |

**Tab. S30 Marker proteins of D-MP66.** Given are averages of regulation factors of three independent biological replicates. Protein functions and regulation are taken from the SubtiWiki database<sup>1</sup>.

| protein | regulation factor | function                                                      | regulation                                                                        |
|---------|-------------------|---------------------------------------------------------------|-----------------------------------------------------------------------------------|
| ClpP    | 4.3               | protein degradation                                           | $\sigma^A, \sigma^B, \text{CtsR}$                                                 |
| DitA    | 2.5               | biosynthesis of teichoic acid                                 | $\sigma^D, \sigma^M, \sigma^X, \sigma^V, \text{Spo0A, YvrHb, stringent response}$ |
| Dps     | 7.6               | iron storage; survival of stress conditions                   | $\sigma^B$                                                                        |
| GreA    | 4.2               | transcription elongation                                      |                                                                                   |
| GsiB    | 3.7               | response to water deficits                                    | $\sigma^I, \sigma^B$                                                              |
| LiaH    | 44.1              | resistance against oxidative stress and cell wall antibiotics | $\sigma^A, \text{LiaR}$                                                           |
| NadE    | 9.2               | NAD biosynthesis                                              | $\sigma^A, \sigma^B$                                                              |
| NfrA    | 5.1               | unknown                                                       | $\sigma^A, \sigma^D, \text{Spo0A, Spx}$                                           |
| PbpE    | 3.5               | endopeptidase                                                 | $\sigma^W$                                                                        |
| PspA    | 9.1               | unknown                                                       | $\sigma^W, \text{AbrB}$                                                           |
| RacX    | 7.1               | production of non-canonical D-amino acids                     | $\sigma^W$                                                                        |
| SalA    | 3.1               | control of alkaline protease expression                       | SalA                                                                              |
| Spo0M   | 6.3               | sporulation                                                   | $\sigma^H, \sigma^W$                                                              |
| YceC    | 16.7              | unknown                                                       | $\sigma^A, \sigma^M, \sigma^W, \sigma^X$                                          |
| YdaG    | 12.4              | survival of stress conditions                                 | $\sigma^B$                                                                        |
| YdbD    | 12.3              | survival of ethanol stress                                    | $\sigma^B$                                                                        |
| YjdA    | 18.5              | unknown                                                       |                                                                                   |
| YoxD    | 9.3               | unknown                                                       |                                                                                   |
| YqkF    | 2.0               | unknown                                                       | $\sigma^E$                                                                        |
| YtkL    | 2.2               | unknown                                                       | $\sigma^B$                                                                        |

**Tab. S31 Marker proteins of L-MP159.** Given are averages of regulation factors of three independent biological replicates. Protein functions and regulation are taken from the SubtiWiki database<sup>1</sup>.

| protein | regulation factor | function                                                      | regulation                                        |
|---------|-------------------|---------------------------------------------------------------|---------------------------------------------------|
| AzoR2   | 8.4               | resistance to 2-methylhydroquinone                            | $\sigma^A$ , $\sigma^G$ , MhqR                    |
| CitZ    | 5.2               | TCA cycle                                                     | $\sigma^A$ , CcpA, CcpC, CitB                     |
| ClpP    | 3.5               | protein degradation                                           | $\sigma^A$ , $\sigma^B$ , CtsR                    |
| Dps     | 2.0               | iron storage; survival of stress conditions                   | $\sigma^B$                                        |
| LiaH    | 27.9              | resistance against oxidative stress and cell wall antibiotics | $\sigma^A$ , LiaR                                 |
| LuxS    | 2.4               | methionine salvage                                            | $\sigma^B$                                        |
| MrgA    | 6.1               | iron storage                                                  | $\sigma^A$ , PerR                                 |
| NadE    | 10.8              | NAD biosynthesis                                              | $\sigma^A$ , $\sigma^B$                           |
| NfrA    | 4.7               | unknown                                                       | $\sigma^A$ , $\sigma^D$ , Spo0A, Spx              |
| PbpE    | 4.7               | endopeptidase                                                 | $\sigma^W$                                        |
| PspA    | 6.2               | unknown                                                       | $\sigma^W$ , AbrB                                 |
| RacX    | 10.5              | production of non-canonical D-amino acids                     | $\sigma^W$                                        |
| SodA    | 2.1               | detoxification of oxygen radicals                             | $\sigma^B$                                        |
| SpoVG   | 2.9               | cell division; control of sporulation initiation              | $\sigma^H$ , AbrB, SinR                           |
| YceC    | 18.0              | unknown                                                       | $\sigma^B$ , $\sigma^M$ , $\sigma^W$ , $\sigma^X$ |
| YceH    | 22.8              | unknown                                                       | $\sigma^B$ , $\sigma^M$ , $\sigma^W$ , $\sigma^X$ |
| YdbD    | 4.1               | survival of ethanol stress                                    | $\sigma^B$                                        |
| YfhM    | 12.7              | survival of ethanol stress                                    | $\sigma^B$ , $\sigma^W$                           |
| YfjR    | 3.1               | unknown                                                       | YclJ                                              |
| YjdA    | 3.8               | unknown                                                       |                                                   |
| YoxD    | 4.9               | unknown                                                       |                                                   |
| YthP    | 2.2               | unknown                                                       | $\sigma^W$                                        |
| YvIB    | 13.0              | unknown                                                       | $\sigma^W$                                        |

**Tab. S32 Marker proteins of mupirocin.** Given are averages of regulation factors of three independent biological replicates. Protein functions and regulation are taken from the SubtiWiki database<sup>1</sup>.

| protein | regulation factor | function                                                                              | regulation                                  |
|---------|-------------------|---------------------------------------------------------------------------------------|---------------------------------------------|
| OhrB    | 2.8               | organic peroxide resistance                                                           | $\sigma^B$                                  |
| PycA    | 7.9               | replenishment of the oxaloacetate pool                                                | $\sigma^A$ , TnrA, YofA, stringent response |
| Tpx     | 6.0               | unknown                                                                               | Spx                                         |
| YdaG    | 5.2               | survival of stress conditions                                                         | $\sigma^B$                                  |
| YtxH    | 6.5               | unknown                                                                               | $\sigma^B$ , $\sigma^H$                     |
| IlvC    | 2.2               | biosynthesis of branched-chain amino acids                                            | $\sigma^A$ , CcpA, CodY, TnrA, T-box        |
| SpoVG   | 4.6               | cell division; control of sporulation initiation                                      | $\sigma^H$ , AbrB, SinR                     |
| YlbA    | 3.1               | unknown                                                                               | AbrB                                        |
| AroA    | 3.0               | biosynthesis of aromatic amino acids                                                  |                                             |
| PstS    | 4.3               | high-affinity phosphate uptake                                                        | $\sigma^A$ , PhoP                           |
| YukJ    | 9.1               | unknown                                                                               |                                             |
| YvyD    | 18.2              | dimerization of ribosomes in the stationary phase; protection against paraquat stress | $\sigma^B$ , $\sigma^D$ , $\sigma^H$ , PhoP |
| YuaE    | 2.8               | unknown                                                                               |                                             |
| YsnF    | 6.6               | survival of ethanol stress                                                            | $\sigma^B$                                  |

**Tab. S33 Marker proteins of nalidixic acid.** Given are averages of regulation factors of three independent biological replicates. Protein functions and regulation are taken from the SubtiWiki database<sup>1</sup>. Superscripts indicate that the protein was identified in multiple spots on the gel image (see Fig. S27).

| protein           | regulation factor | function                                            | regulation                                      |
|-------------------|-------------------|-----------------------------------------------------|-------------------------------------------------|
| Abh               | 3.2               | transcriptional regulator of transition state genes | $\sigma^M, \sigma^V, \sigma^X$                  |
| AckA              | 4.0               | overflow metabolism                                 | $\sigma^A, CcpA, CodY$                          |
| AdcA              | 3.5               | zinc uptake                                         | $\sigma^A, Zur$                                 |
| AhpF <sup>1</sup> | 4.0               | resistance against peroxide stress                  | $\sigma^A, PerR$                                |
| AhpF <sup>2</sup> | 6.2               |                                                     |                                                 |
| Apt               | 2.9               | purine salvage and interconversion                  | stringent response                              |
| CarB              | 8.9               | biosynthesis of arginine                            | $\sigma^A, AhrC, CodY$                          |
| FabF              | 6.5               | fatty acid biosynthesis                             | $\sigma^A, \sigma^W, FapR$                      |
| Fur               | 5.0               | regulation of iron homeostasis                      | $\sigma^A, PerR$                                |
| HslO              | 3.7               | unknown                                             | $\sigma^M$                                      |
| KatA              | 9.3               | detoxification (degradation) of hydrogen peroxide   | PerR                                            |
| LysC              | 5.4               | biosynthesis of lysine                              | L-box                                           |
| Mbl               | 6.1               | cell shape determination                            | $\sigma^A, \sigma^E, \text{stringent response}$ |
| PyrK              | 5.5               | pyrimidine biosynthesis                             | $\sigma^A, PyrR$                                |
| QueC              | 5.0               | tRNA modification                                   | preQ1 riboswitch                                |
| SpeA              | 5.4               | spermidine, polyamine biosynthesis                  |                                                 |
| SufB <sup>1</sup> | 2.6               | synthesis of Fe-Sclusters                           | $\sigma^A$                                      |
| SufB <sup>2</sup> | 3.9               |                                                     |                                                 |
| SufC              | 3.3               | synthesis of Fe-Sclusters                           | $\sigma^A$                                      |
| TenA              | 5.2               | thiamine salvage                                    | Thi-box                                         |
| TufA <sup>1</sup> | 3.8               | translation                                         | stringent response                              |
| TufA <sup>2</sup> | 2.9               |                                                     |                                                 |
| YfmT              | 5.4               | unknown                                             | $\sigma^D$                                      |
| YhbJ              | 43.5              | unknown                                             |                                                 |
| YhcB              | 18.5              | unknown                                             |                                                 |
| YlbN              | 4.9               | accumulation of 23S rRNA                            | stringent response                              |
| YkvM              | 4.8               | tRNA modification                                   | preQ1 riboswitch                                |
| YqfS              | 2.4               | repair of oxidative DNA damage in spores            | $\sigma^G$                                      |
| Yual              | 13.2              | unknown                                             | $\sigma^W$                                      |



**Tab. S34 Marker proteins of nocathiacin I.** Given are averages of regulation factors of three independent biological replicates. Protein functions and regulation are taken from the SubtiWiki database<sup>1</sup>. Superscripts indicate that the protein was identified in multiple spots on the gel image (see Fig. S28).

| <b>protein</b>    | <b>regulation factor</b> | <b>function</b>                      | <b>regulation</b>                     |
|-------------------|--------------------------|--------------------------------------|---------------------------------------|
| FusA              | 2.6                      | translation                          | stringent response                    |
| GapA              | 4.8                      | catabolic enzyme in glycolysis       | $\sigma^A$ , CggR                     |
| Hag               | 3.5                      | motility and chemotaxis              | $\sigma^D$ , CodY, CsrA, ScoC         |
| PurQ              | 8.1                      | purine biosynthesis                  | $\sigma^A$ , PurR, G-box              |
| RplD              | 13.1                     | translation                          | $\sigma^A$ , stringent response       |
| RplJ              | 4.5                      | translation                          | RplJ, RplL, stringent response        |
| RplL              | 10.0                     | translation                          | RplJ, RplL, stringent response        |
| RplR              | 4.0                      | translation                          | $\sigma^A$ , stringent response       |
| RpsB <sup>1</sup> | 16.2                     |                                      |                                       |
| RpsB <sup>2</sup> | 12.9                     |                                      |                                       |
| RpsB <sup>3</sup> | 6.4                      | translation                          | stringent response                    |
| RpsB <sup>4</sup> | 3.7                      |                                      |                                       |
| RpsF <sup>1</sup> | 5.7                      |                                      |                                       |
| RpsF <sup>2</sup> | 5.3                      | translation                          | $\sigma^A$ , ComK, stringent response |
| SufB              | 5.2                      | synthesis of Fe-S clusters           | $\sigma^A$                            |
| TufA <sup>1</sup> | 10.1                     |                                      |                                       |
| TufA <sup>2</sup> | 5.6                      | translation                          | stringent response                    |
| YkrA              | 9.8                      | unknown                              |                                       |
| YugL              | 3.0                      | enzyme in glycolysis/gluconeogenesis |                                       |

**Tab. S35 Marker proteins of NV503.** Given are averages of regulation factors of three independent biological replicates. Protein functions and regulation are taken from the SubtiWiki database<sup>1</sup>.

| protein | regulation factor | function                                                                              | regulation                                                                           |
|---------|-------------------|---------------------------------------------------------------------------------------|--------------------------------------------------------------------------------------|
| AzoR2   | 8.6               | resistance to 2-methylhydroquinone                                                    | $\sigma^A$ , $\sigma^G$ , MhqR                                                       |
| BglH    | 4.6               |                                                                                       |                                                                                      |
| Ctc     | 2.7               | unknown                                                                               | $\sigma^A$ , $\sigma^B$ , stringent response                                         |
| DltA    | 4.9               | biosynthesis of teichoic acid                                                         | $\sigma^D$ , $\sigma^M$ , $\sigma^V$ , $\sigma^X$ , Spo0A, YvrHB, stringent response |
| FabZ    | 4.8               | fatty acid biosynthesis                                                               |                                                                                      |
| Hom     | 6.6               | biosynthesis of methionine and threonine                                              | CodY, ThrR, TnrA                                                                     |
| HslO    | 2.4               | unknown                                                                               | $\sigma^M$                                                                           |
| IspF    | 3.6               | MEP pathway of isoprenoid biosynthesis                                                | $\sigma^B$ , $\sigma^M$                                                              |
| LiaH    | 215.4             | resistance against oxidative stress and cell wall antibiotics                         | $\sigma^A$ , LiaR                                                                    |
| MsrB    | 3.8               | regeneration of methionine and restoration of protein function after oxidative damage | $\sigma^A$ , Spx                                                                     |
| NadE    | 5.4               | NAD biosynthesis                                                                      | $\sigma^A$ , $\sigma^B$                                                              |
| NadF    | 4.5               | generation of NADP from NAD                                                           |                                                                                      |
| NusA    | 3.8               | transcription                                                                         | $\sigma^A$ , $\sigma^B$ , NusA, stringent response                                   |
| OdhB    | 6.6               | TCA cycle                                                                             | $\sigma^A$ , CcpA                                                                    |
| PdxS    | 3.1               | pyridoxal-5-phosphate biosynthesis                                                    | Spo0A                                                                                |
| PrmA    | 7.8               | unknown                                                                               | $\sigma^A$ , HrcA                                                                    |
| PspA    | 7.9               | unknown                                                                               | $\sigma^W$ , AbrB                                                                    |
| RacX    | 12.0              | production of non-canonical D-amino acids                                             | $\sigma^W$                                                                           |
| RibH    | 3.2               | riboflavin biosynthesis                                                               | $\sigma^A$ , FMN-box                                                                 |
| RimM    | 4.1               | maturation of 16S rRNA                                                                |                                                                                      |
| RpsB    | 3.0               | translation                                                                           | stringent response                                                                   |
| SdhA    | 4.5               | TCA cycle                                                                             | $\sigma^A$ , FarA                                                                    |
| SkfG    | 3.5               | unknown                                                                               | $\sigma^A$ , AbrB, PhoP, Spo0A                                                       |
| ThrS    | 8.4               | translation                                                                           | $\sigma^A$ , T-box                                                                   |
| TrmK    | 5.7               | tRNA modification                                                                     |                                                                                      |
| TrxB    | 4.6               | keeps TrxA in reduced state                                                           | Spx                                                                                  |
| YceC    | 7.7               | unknown                                                                               | $\sigma^B$ , $\sigma^M$ , $\sigma^W$ , $\sigma^X$                                    |
| YceH    | 2.9               | unknown                                                                               | $\sigma^B$ , $\sigma^M$ , $\sigma^W$ , $\sigma^X$                                    |
| YdbD    | 5.8               | survival of ethanol stress                                                            | $\sigma^B$                                                                           |
| YfjR    | 4.2               | unknown                                                                               | YclJ                                                                                 |
| YfmS    | 12.1              | control of chemotaxis                                                                 | $\sigma^D$                                                                           |
| YhfE    | 3.5               | unknown                                                                               |                                                                                      |
| YjdA    | 5.8               | unknown                                                                               |                                                                                      |
| YphP    | 4.7               | de-bacillithiolation of S-bacillithiolated OhrR and MetE                              |                                                                                      |
| YqeK    | 2.3               | unknown                                                                               |                                                                                      |
| YqkB    | 8.7               | unknown                                                                               |                                                                                      |
| YqkF    | 5.3               | unknown                                                                               | $\sigma^E$                                                                           |
| YsnF    | 4.1               | survival of ethanol stress                                                            | $\sigma^B$                                                                           |
| Yual    | 3.1               | unknown                                                                               | $\sigma^W$                                                                           |
| Yugl    | 4.9               | unknown                                                                               | stringent response                                                                   |
| YvlB    | 5.0               | unknown                                                                               | $\sigma^W$                                                                           |
| YwrO    | 2.9               | unknown                                                                               |                                                                                      |
| YxaB    | 3.5               | biofilm formation; survival of salt and ethanol stress                                | $\sigma^A$ , $\sigma^B$ , AbrB                                                       |

**Tab. S36 Marker proteins of salvarsan.** Given are averages of regulation factors of three independent biological replicates. Protein functions and regulation are taken from the SubtiWiki database<sup>1</sup>.

| protein | regulation factor | function                                                                              | regulation                                         |
|---------|-------------------|---------------------------------------------------------------------------------------|----------------------------------------------------|
| AbrB    | 3.0               | regulation of gene expression during the transition from growth to stationary phase   | $\sigma^A$ , AbrB, Spo0A                           |
| AmpS    | 4.2               | required for biofilm formation                                                        |                                                    |
| ArsC    | 38.2              | detoxification of arsenate                                                            | $\sigma^A$ , $\sigma^F$ , ArsR                     |
| Cah     | 32.7              | resistance to cephalosporin C                                                         |                                                    |
| Cmk     | 8.8               | synthesis of CTP and dCTP                                                             |                                                    |
| CysC    | 3.2               | sulfate reduction and activation                                                      | $\sigma^A$ , CymR, S-box                           |
| CysK    | 12.9              | biosynthesis of cysteine, control of CymR activity                                    | $\sigma^A$ , $\sigma^M$ , CymR, Spx                |
| GreA    | 3.6               | transcription elongation                                                              |                                                    |
| GroEL   | 9.1               | protein folding and re-folding                                                        | $\sigma^A$ , HrcA                                  |
| GroES   | 8.3               | protein folding and re-folding                                                        | $\sigma^A$ , HrcA                                  |
| HemH    | 5.7               | biosynthesis of heme                                                                  |                                                    |
| IolS    | 4.6               | unknown                                                                               | $\sigma^A$ , IolR                                  |
| MccB    | 18.7              | methionine-to-cysteine conversion                                                     | $\sigma^A$ , CymR, Spx                             |
| NusA    | 8.1               | transcription                                                                         | $\sigma^A$ , $\sigma^B$ , NusA, stringent response |
| PepF    | 5.1               | protein degradation                                                                   |                                                    |
| PtsI    | 11.1              | PTS-dependent sugar transport                                                         | $\sigma^A$ , GlcT, stringent response              |
| PyrF    | 3.2               | pyrimidine biosynthesis                                                               | $\sigma^A$ , PyrR                                  |
| RplL    | 12.0              | translation                                                                           | RplJ, RplL, stringent response                     |
| RplR    | 5.3               | translation                                                                           | $\sigma^A$ , stringent response                    |
| SalA    | 18.7              | control of alkaline protease expression                                               | SalA                                               |
| SodA    | 4.7               | detoxification of oxygen radicals                                                     | $\sigma^B$                                         |
| SpoVG   | 2.8               | cell division, control of sporulation initiation                                      | $\sigma^H$ , AbrB, SinR                            |
| YfkO    | 4.2               | protection against NaOCl stress                                                       | $\sigma^A$ , HypR                                  |
| YlaL    | 3.8               | unknown                                                                               |                                                    |
| YmaB    | 3.5               | unknown                                                                               | $\sigma^A$ , NrdR, PerR, ResD                      |
| YocJ    | 4.2               | quinone detoxification                                                                | YodB                                               |
| YuaE    | 7.4               | unknown                                                                               |                                                    |
| YvrD    | 13.7              | unknown                                                                               |                                                    |
| YvyD    | 4.8               | dimerization of ribosomes in the stationary phase, protection against paraquat stress | $\sigma^B$ , $\sigma^D$ , $\sigma^H$ , PhoP        |
| Ywfl    | 3.6               | lipoic acid metabolism                                                                |                                                    |
| YxeK    | 12.3              | utilization and detoxification of S-(2-succino)cysteine                               | $\sigma^A$ , CymR                                  |

**Tab. S37 Marker proteins of squalamine.** Given are averages of regulation factors of three independent biological replicates. Protein functions and regulation are taken from the SubtiWiki database<sup>1</sup>.

| protein | regulation factor | function                                                      | regulation                     |
|---------|-------------------|---------------------------------------------------------------|--------------------------------|
| LiaH    | 3.5               | resistance against oxidative stress and cell wall antibiotics | $\sigma^A$ , LiaR              |
| PrmA    | 4.4               | unknown                                                       | $\sigma^A$ , HrcA              |
| SdhA    | 5.8               | TCA cycle                                                     | $\sigma^A$ , FarA              |
| YqkF    | 8.8               | unknown                                                       | $\sigma^E$                     |
| YxaB    | 2.4               | biofilm formation; survival of salt and ethanol stress        | $\sigma^A$ , $\sigma^B$ , AbrB |

**Tab. S38 Marker proteins of telithromycin.** Given are averages of regulation factors of three independent biological replicates. Protein functions and regulation are taken from the SubtiWiki database<sup>1</sup>.

| protein | regulation factor | function                                                        | regulation                                        |
|---------|-------------------|-----------------------------------------------------------------|---------------------------------------------------|
| AdcA    | 4.2               | zinc uptake                                                     | $\sigma^A$ , Zur                                  |
| Adk     | 2.5               | ADP formation                                                   | $\sigma^A$ , stringent response                   |
| DivIVA  | 21.8              | septum placement                                                | Spo0A                                             |
| DnaK    | 4.8               | protein quality control                                         | $\sigma^A$ , HrcA                                 |
| Eno     | 13.9              | enzyme in glycolysis/gluconeogenesis                            | $\sigma^A$ , CggR                                 |
| Gid     | 6.1               | tRNA modification                                               | ComK, DnaA                                        |
| lolS    | 9.7               | unknown, may be involved in myo-inositol catabolism             | $\sigma^A$ , lolR                                 |
| LeuS    | 2.5               | translation                                                     | T-box                                             |
| MetE    | 4.1               | biosynthesis of methionine                                      | S-box                                             |
| OppA    | 6.2               | initiation of sporulation; competence development               | CodY, ScoC, TnrA                                  |
| PdhD    | 9.3               | links glycolysis and TCA cycle; enzyme in TCA cycle             | $\sigma^A$ , stringent response                   |
| Pgk     | 11.5              | enzyme in glycolysis/gluconeogenesis                            | $\sigma^A$ , CggR                                 |
| PrfA    | 8.1               | translation                                                     |                                                   |
| PupG    | 6.8               | purine salvage and interconversion                              | $\sigma^A$ , CcpA                                 |
| PyrAA   | 3.9               | pyrimidine biosynthesis                                         | $\sigma^A$ , PyrR                                 |
| RplJ    | 6.9               | translation                                                     | RplJ, stringent response                          |
| SufD    | 2.5               | synthesis of Fe-S-clusters                                      | $\sigma^A$                                        |
| TpiA    | 30.1              | enzyme in glycolysis/gluconeogenesis                            | $\sigma^A$ , CggR                                 |
| TufA    | 12.9              | translation                                                     | stringent response                                |
| YceE    | 2.7               | required for survival of ethanol stress and at low temperatures | $\sigma^B$ , $\sigma^M$ , $\sigma^W$ , $\sigma^X$ |
| YhdK    | 9.6               | control of $\sigma^M$ activity                                  | $\sigma^A$ , $\sigma^M$                           |
| YitJ    | 2.6               | methionine biosynthesis; tetrahydrofolate interconversion       | S-box                                             |
| YqfS    | 7.9               | repair of oxidative DNA damage in spores                        | $\sigma^G$                                        |
| YrpE    | 2.9               | zinc-binding protein                                            | $\sigma^A$ , Zur                                  |
| YxjG    | 2.3               | unknown                                                         | S-box                                             |

**Tab. S39 Marker proteins of tunicamycin.** Given are averages of regulation factors of three independent biological replicates. Protein functions and regulation are taken from the SubtiWiki database<sup>1</sup>. Superscripts indicate that the protein was identified in multiple spots on the gel image (see Fig. S33).

| protein           | regulation factor | function                                      | regulation                                        |
|-------------------|-------------------|-----------------------------------------------|---------------------------------------------------|
| AhpC              | 3.6               | resistance against peroxide stress            | $\sigma^A$ , PerR                                 |
| AhpF <sup>1</sup> | 3.2               | resistance against peroxide stress            | $\sigma^A$ , PerR                                 |
| AhpF <sup>2</sup> | 3.1               |                                               |                                                   |
| CysC              | 3.7               | sulfate reduction and activation              | $\sigma^A$ , CymR, S-box                          |
| DhbB              | 102.8             | biosynthesis of the siderophore bacillibactin | $\sigma^A$ , AbrB, Fur, Kre                       |
| GuaB              | 8.3               | biosynthesis of GMP                           | CodY                                              |
| MntA              | 4.9               | manganese uptake                              | MntR                                              |
| NagBB             | 2.4               | N-acetylglucosamine utilization               | $\sigma^A$ , CcpA, NagR                           |
| PspA              | 3.9               | unknown                                       | $\sigma^W$ , AbrB                                 |
| RacX              | 5.0               | production of non-canonical D-amino acids     | $\sigma^W$                                        |
| TasA              | 4.0               | biofilm formation                             | $\sigma^A$ , AbrB, LutR, RemA, SinR               |
| YceC              | 2.7               | unknown                                       | $\sigma^B$ , $\sigma^M$ , $\sigma^W$ , $\sigma^X$ |
| YdbD              | 2.5               | survival of ethanol stress                    | $\sigma^B$                                        |
| YgxA              | 4.9               | unknown                                       | $\sigma^E$ , $\sigma^F$                           |
| YqiG              | 3.2               | unknown                                       |                                                   |
| YrhB              | 5.3               | methionine-to-cystein conversion              | $\sigma^A$ , CymR, Spx                            |
| YugK              | 3.1               | unknown                                       |                                                   |
| YvIB              | 10.3              | unknown                                       | $\sigma^W$                                        |

**Tab. S40 Marker proteins of UC41.** Given are averages of regulation factors of three independent biological replicates. Protein functions and regulation are taken from the SubtiWiki database<sup>1</sup>.

| protein | regulation factor | function                                                                            | regulation                                                         |
|---------|-------------------|-------------------------------------------------------------------------------------|--------------------------------------------------------------------|
| FabZ    | 2.5               | fatty acid biosynthesis                                                             |                                                                    |
| FosB    | 8.7               | confers resistance against antimicrobial compounds from <i>B. amyloliquefaciens</i> | $\sigma^W$                                                         |
| GamA    | 5.7               | glucosamine utilization                                                             | $\sigma^A$ , GamR                                                  |
| GroEL   | 3.4               | protein folding and re-folding                                                      | $\sigma^A$ , HrcA                                                  |
| LiaH    | 19.0              | resistance against oxidative stress and cell wall antibiotics                       | $\sigma^A$ , LiaR                                                  |
| MrgA    | 11.2              | iron storage                                                                        | $\sigma^A$ , PerR                                                  |
| MurB    | 2.5               | peptidoglycan precursor biosynthesis                                                | $\sigma^A$ , $\sigma^E$ , $\sigma^M$ , SpoIIID, stringent response |
| NadE    | 10.7              | NAD biosynthesis                                                                    | $\sigma^A$ , $\sigma^B$                                            |
| NfrA    | 5.7               | unknown                                                                             | $\sigma^A$ , $\sigma^D$ , Spo0A, Spx                               |
| PbpC    | 10.0              | unknown                                                                             |                                                                    |
| PspA    | 23.0              | unknown                                                                             | $\sigma^W$ , AbrB                                                  |
| SodA    | 4.0               | detoxification of oxygen radicals                                                   | $\sigma^B$                                                         |
| Spo0M   | 5.5               | sporulation                                                                         | $\sigma^H$ , $\sigma^W$                                            |
| TrmB    | 13.8              | tRNA modification                                                                   |                                                                    |
| YceH    | 11.8              | unknown                                                                             | $\sigma^B$ , $\sigma^M$ , $\sigma^W$ , $\sigma^X$                  |
| YjdA    | 3.5               | unknown                                                                             |                                                                    |
| YoxD    | 11.8              | unknown                                                                             |                                                                    |
| YvIB    | 5.6               | unknown                                                                             | $\sigma^W$                                                         |

**Tab. S41 nUPLC-ESI-MS-based protein identification for amidochelocardin 5, 10, and 20 µg/ml.** Protein names were taken from SubtiWiki database<sup>1</sup>. Superscripts indicate that the protein was identified in multiple spots on the gel image (see Fig. S2).

| protein           | protein name                                                    | MW [Da] | pI  | PLGS score | peptides | coverage [%] |
|-------------------|-----------------------------------------------------------------|---------|-----|------------|----------|--------------|
| AccB              | acetyl-CoA carboxylase                                          | 17217   | 4.4 | 2363       | 6        | 60           |
| AhpC <sup>1</sup> | alkyl hydroperoxide reductase (small subunit)                   | 20614   | 4.3 | 64870      | 42       | 90           |
| AhpC <sup>2</sup> |                                                                 |         |     | 21997      | 32       | 71           |
| Dps               | mini-ferritin                                                   | 16583   | 4.4 | 1218       | 2        | 13           |
| GreA              | transcription elongation factor                                 | 17260   | 4.5 | 2477       | 7        | 68           |
| LpdV              | dihydrolipoamide dehydrogenase (E3 subunit)                     | 50404   | 5.0 | 8039       | 50       | 74           |
| MccA              | O-acetylserine-thiol-lyase                                      | 32997   | 5.2 | 1593       | 33       | 69           |
| MtnB              | methylthioribulose-1-phosphate dehydratase                      | 23474   | 5.7 | 8578       | 31       | 72           |
| PanB              | 2-methyl-2-oxobutanoate hydroxymethyltransferase                | 29739   | 5.3 | 14071      | 37       | 89           |
| PdxT              | pyridoxal-5-phosphate synthase                                  | 21433   | 5.0 | 13859      | 6        | 44           |
| RibH              | riboflavin synthase (beta subunit)                              | 16276   | 5.2 | 36364      | 49       | 92           |
| RsbV              | anti-anti-σB                                                    | 11931   | 4.7 | 12444      | 21       | 84           |
| SodA              | superoxide dismutase                                            | 22476   | 5.1 | 53335      | 30       | 89           |
| SufB              | FeS scaffold, synthesis of Fe-S-clusters                        | 52696   | 5.0 | 2512       | 44       | 64           |
| ThiD              | 4-amino-5-hydroxymethyl-2-methylpyrimidine pyrophosphate kinase | 29105   | 5.7 | 14039      | 61       | 93           |
| TrxA              | thioredoxin                                                     | 11385   | 4.3 | 15787      | 31       | 68           |
| YhdN              | aldo/keto reductase                                             | 37289   | 4.8 | 380        | 12       | 38           |
| YtoP              | similar to endo-1.4-beta-glucanase                              | 39211   | 5.7 | 3629       | 30       | 73           |
| YvIB              | unknown                                                         | 41055   | 5.4 | 4151       | 25       | 56           |
| YxxG              | immunity protein                                                | 16418   | 4.4 | 10624      | 40       | 92           |

**Tab. S42 nUPLC-ESI-MS-based protein identification for AN3334.** Protein names were taken from SubtiWiki database<sup>1</sup>.

| protein | protein name                                                                 | MW [Da] | pI  | PLGS score | peptides | coverage [%] |
|---------|------------------------------------------------------------------------------|---------|-----|------------|----------|--------------|
| AroA    | 3-deoxy-D-arabino-heptulosonate 7-phosphate synthase                         | 39514   | 5.3 | 1287       | 26       | 62           |
| BacB    | oxidase                                                                      | 26822   | 5.2 | 526        | 22       | 67           |
| GsiB    | general stress protein                                                       | 13789   | 5.1 | 3946       | 29       | 75           |
| IlvC    | ketol-acid reductoisomerase (2,3-dihydroxy-3-methylbutanoate,2-acetolacetat) | 37434   | 5.4 | 20494      | 107      | 82           |
| LeuD    | 3-isopropylmalate dehydratase (small subunit)                                | 23007   | 4.6 | 9069       | 39       | 76           |
| NfrA    | FMN-containing NADPH-linked nitro/flavin reductase                           | 28302   | 5.7 | 2190       | 17       | 58           |
| SpoVG   | negative effector of asymmetric septation                                    | 10886   | 5.1 | 2393       | 11       | 64           |
| TrxA    | thioredoxin                                                                  | 11385   | 4.3 | 3407       | 11       | 68           |
| YfkM    | glyoxalase III-like enzyme                                                   | 18851   | 4.7 | 3237       | 25       | 59           |
| YlbA    | unknown                                                                      | 13484   | 5.0 | 2163       | 9        | 69           |
| YneT    | unknown                                                                      | 14979   | 5.3 | 12943      | 26       | 70           |
| YtxH    | unknown                                                                      | 16544   | 5.1 | 7754       | 26       | 69           |
| YuaE    | unknown                                                                      | 19098   | 6.2 | 4991       | 22       | 69           |
| YvyD    | ribosome hibernation promoting factor                                        | 21966   | 5.2 | 6768       | 40       | 68           |

**Tab. S43 nUPLC-ESI-MS-based protein identification for anhydrotetracycline 0.5, 2, and 4 µg/ml.** Protein names were taken from SubtiWiki database<sup>1</sup>.

| protein | protein name                                                                                               | MW [Da] | pI  | PLGS score | peptides | coverage [%] |
|---------|------------------------------------------------------------------------------------------------------------|---------|-----|------------|----------|--------------|
| Abh     | transcriptional regulator of transition state genes                                                        | 10249   | 5.8 | 16707      | 9        | 52           |
| DefB    | N-formylcysteine deformylase                                                                               | 20642   | 5.5 | 6591       | 19       | 74           |
| FabD    | malonyl CoA-acyl carrier protein transacylase                                                              | 34013   | 4.5 | 11683      | 50       | 85           |
| FlgK    | flagellar hook-filament junction proteins                                                                  | 54321   | 4.4 | 18979      | 60       | 84           |
| GcaD    | bifunctional N-acetylglucosamine-1-phosphate uridylyltransferase/glucosamine-1-phosphate acetyltransferase | 49423   | 5.7 | 1584       | 11       | 15           |
| HemE    | uroporphyrinogen decarboxylase (uroporphyrinogen III)                                                      | 39621   | 5.3 | 5542       | 31       | 68           |
| HprT    | hypoxanthine phosphoribosyltransferase                                                                     | 20226   | 4.6 | 6127       | 17       | 72           |
| MurAA   | UDP-N-acetylglucosamine 1-carboxyvinyltransferase                                                          | 46671   | 5.5 | 1584       | 29       | 48           |
| MurF    | UDP-N-acetylmuramoyl-L-alanyl-D-glutamyl-meso-2,6-diaminopimeloyl-D-alanyl-D-alanine synthetase            | 49691   | 5.3 | 800        | 14       | 44           |
| Nfo     | type IV apurinic/aprimidinic endonuclease                                                                  | 33047   | 5.4 | 355        | 14       | 30           |
| OhrB    | general stress protein                                                                                     | 14591   | 4.7 | 5660       | 11       | 82           |
| OpuAA   | glycin betain and arsenobetaine ABC transporter (ATP-binding protein)                                      | 43565   | 4.7 | 17777      | 91       | 68           |
| PanB    | 2-methyl-2-oxobutanoate hydroxymethyltransferase                                                           | 29739   | 5.3 | 402        | 4        | 32           |
| PanC    | pantothenate synthase                                                                                      | 31928   | 4.6 | 4213       | 29       | 55           |
| PpiB    | peptidyl-prolyl isomerase                                                                                  | 15246   | 5.5 | 2458       | 8        | 34           |
| PtsH    | histidine-containing phosphocarrier protein HPr of PTS                                                     | 9183    | 4.6 | 3706       | 6        | 85           |
| PurB    | adenylsuccinate lyase                                                                                      | 49453   | 5.8 | 8215       | 50       | 59           |
| PurC    | phosphoribosylaminoimidazole succinocarboxamide synthase                                                   | 27443   | 4.9 | 2092       | 13       | 49           |
| SpoVG   | negative effector of asymmetric septation                                                                  | 10886   | 5.1 | 19921      | 30       | 89           |
| ThrC    | threonine synthase                                                                                         | 37440   | 5.2 | 557        | 5        | 13           |
| Ydgl    | unknown                                                                                                    | 23344   | 4.7 | 1130       | 12       | 40           |
| YoxD    | unknown                                                                                                    | 25283   | 5.3 | 14514      | 42       | 69           |
| YpuA    | unknown                                                                                                    | 31275   | 4.5 | 15963      | 41       | 73           |
| YqeY    | unknown                                                                                                    | 16755   | 5.5 | 2062       | 7        | 49           |
| YqiK    | cytoplasmic glycerophosphodiester phosphodiesterase                                                        | 27102   | 5.9 | 644        | 9        | 37           |
| YtpR    | unknown                                                                                                    | 21682   | 4.3 | 1974       | 11       | 78           |
| YtsP    | unknown                                                                                                    | 18057   | 4.4 | 2783       | 20       | 68           |
| YuaE    | unknown                                                                                                    | 19098   | 6.2 | 3456       | 23       | 54           |
| YvIB    | unknown                                                                                                    | 41055   | 5.4 | 852        | 16       | 32           |

**Tab. S44 nUPLC-ESI-MS-based protein identification for As<sub>2</sub>O<sub>3</sub>.** Protein names were taken from SubtiWiki database<sup>1</sup>.

| protein | protein name                                            | MW [Da] | pI   | PLGS score | peptides | coverage [%] |
|---------|---------------------------------------------------------|---------|------|------------|----------|--------------|
| AhpF    | alkyl hydroperoxide reductase/NADH dehydrogenase        | 54839   | 4.7  | 1302       | 20       | 31           |
| Ald     | L-alanine dehydrogenase                                 | 39658   | 5.2  | 3551       | 20       | 60           |
| AmpS    | aminopeptidase                                          | 45769   | 5.0  | 2138       | 10       | 20           |
| ArsC    | arsenate reductase                                      | 15585   | 4.7  | 3898       | 13       | 57           |
| ClpC    | AAA unfoldase; ATPase subunit of the ClpC-ClpP protease | 90063   | 5.7  | 3732       | 45       | 48           |
| CysS    | cysteine-tRNA synthetase                                | 53873   | 5.1  | 1999       | 30       | 47           |
| GroEL   | chaperonin; co-repressor for HrcA                       | 57388   | 4.5  | 15563      | 174      | 86           |
| GrpE    | heat-shock protein                                      | 21669   | 4.3  | 3557       | 13       | 31           |
| Hag     | flagellin protein                                       | 32606   | 4.8  | 1852       | 3        | 13           |
| KatA    | vegetative catalase                                     | 54757   | 6.1  | 4687       | 70       | 59           |
| PdhA    | pyruvate dehydrogenase                                  | 41522   | 5.8  | 264        | 9        | 28           |
| Pdp     | pyrimidine nucleoside phosphorylase                     | 46178   | 4.8  | 924        | 12       | 24           |
| PepF    | oligoendopeptidase                                      | 77024   | 5.5  | 7798       | 53       | 50           |
| PnpA    | polynucleotide phosphorylase                            | 77415   | 4.9  | 3311       | 30       | 23           |
| PspA    | unknown                                                 | 25125   | 5.8  | 276        | 2        | 8            |
| PtsI    | phosphotransferase system enzyme I                      | 63039   | 4.6  | 11287      | 113      | 63           |
| RpsD    | ribosomal protein S4                                    | 22821   | 10.2 | 394        | 1        | 4            |
| YfjR    | 3-hydroxyisobutyrate dehydrogenase                      | 30454   | 4.9  | 1461       | 9        | 30           |
| YkaA    | unknown                                                 | 23829   | 4.9  | 2780       | 17       | 30           |
| YocJ    | azoreductase                                            | 22962   | 5.0  | 5739       | 44       | 78           |
| YqkC    | unknown                                                 | 16679   | 5.1  | 4049       | 12       | 41           |
| YrhB    | cystathionine lyase/ homocysteine gamma-lyase           | 40860   | 5.2  | 4290       | 26       | 40           |
| YtcJ    | unknown                                                 | 58440   | 5.5  | 65         | 4        | 9            |
| YutF    | p-nitrophenyl phosphatase                               | 27938   | 4.5  | 1231       | 6        | 23           |
| YvyD    | ribosome hibernation promoting factor                   | 21966   | 5.2  | 2541       | 13       | 33           |
| YwaA    | branched-chain amino acid aminotransferase              | 40266   | 5.0  | 7315       | 82       | 69           |
| Ywfl    | GcvH:E2 amidotransferase                                | 28883   | 5.1  | 1655       | 9        | 20           |
| YxeK    | N-acetyl S-(2-succino)cysteine oxygenase                | 49308   | 5.7  | 2801       | 26       | 57           |
| YxeP    | N-acetylcysteine deacetylase                            | 41526   | 5.3  | 403        | 1        | 2            |

**Tab. S45 nUPLC-ESI-MS-based protein identification for As<sub>2</sub>O<sub>5</sub>.** Protein names were taken from SubtiWiki database<sup>1</sup>.

| protein | protein name                              | MW [Da] | pI  | PLGS score | peptides | coverage [%] |
|---------|-------------------------------------------|---------|-----|------------|----------|--------------|
| BkdAA   | 2-oxoisovalerate dehydrogenase            | 36310   | 4.8 | 1027       | 12       | 43           |
| Cah     | cephalosporin C deacetylase               | 35784   | 5.4 | 6521       | 48       | 67           |
| Ctc     | ribosomal protein                         | 22042   | 4.2 | 5597       | 11       | 34           |
| CysK    | cysteine synthase                         | 32799   | 5.5 | 4560       | 53       | 65           |
| Dps     | mini-ferritin                             | 16583   | 4.4 | 4691       | 28       | 77           |
| Eno     | enolase                                   | 46552   | 4.5 | 2171       | 26       | 35           |
| GroEL   | chaperonin; co-repressor for HrcA         | 57388   | 4.5 | 1713       | 6        | 19           |
| GsiB    | general stress protein                    | 13789   | 5.1 | 2452       | 8        | 47           |
| Hag     | flagellin protein                         | 32606   | 4.8 | 11948      | 62       | 59           |
| Spo0M   | unknown                                   | 29714   | 4.3 | 4635       | 32       | 43           |
| YfmS    | soluble chemotaxis receptor               | 30305   | 4.5 | 5702       | 34       | 56           |
| YhfK    | unknown                                   | 22745   | 5.2 | 2680       | 14       | 64           |
| YkwC    | beta-hydroxyacid dehydrogenase            | 30691   | 5.1 | 500        | 8        | 30           |
| YqfS    | type IV apurinic/aprimidinic endonuclease | 33047   | 5.4 | 600        | 8        | 21           |
| YtxH    | unknown                                   | 16544   | 5.1 | 1442       | 7        | 36           |



**Tab. S46 MALDI-TOF/TOF-based protein identification for ASD.** Protein names were taken from SubtiWiki database<sup>1</sup>. Superscripts indicate when a protein was identified in multiple spots. Superscripts indicate that the protein was identified in multiple spots on the gel image (see Fig. S7).

| protein           | protein Name                                                | MW [Da] | pI   | peptides | protein score C.I.% |
|-------------------|-------------------------------------------------------------|---------|------|----------|---------------------|
| CspR              | tRNA (Um34/Cm34) methyltransferase homolog                  | 18574   | 6.1  | 10       | 100                 |
| Ctc               | unknown                                                     | 22042   | 4.4  | 8        | 100                 |
| Eno               | enolase                                                     | 46552   | 4.7  | 17       | 100                 |
| FabZ              | $\beta$ -hydroxyacyl-ACP dehydratase                        | 14759   | 9.1  | 10       | 100                 |
| IspF              | 2-C-methyl-D-erythrol-2,4-cyclodiphosphate synthase         | 17115   | 5.5  | 13       | 100                 |
| LiaH              | similar to phage shock protein                              | 31591   | 5.3  | 11       | 100                 |
| MsrB              | peptide methionine sulfoxide reductase                      | 16591   | 5.9  | 7        | 100                 |
| OhrB              | general stress protein                                      | 14591   | 4.9  | 3        | 100                 |
| PepF              | oligopeptidase                                              | 70100   | 5.3  | 19       | 100                 |
| Pgm               | 2,3-bisphosphoglycerate-independent phosphoglycerate mutase | 56274   | 5.3  | 17       | 100                 |
| PrmA              | unknown                                                     | 34573   | 4.8  | 7        | 100                 |
| PspA              | phage shock protein A homolog                               | 25125   | 5.9  | 2        | 100                 |
| PtsH              | histidine-containing phosphocarrier protein HPr of the PTS  | 9184    | 4.9  | 6        | 100                 |
| RibH              | riboflavin synthase (beta subunit)                          | 16276   | 5.4  | 8        | 100                 |
| RimM              | 16S rRNA processing RNase                                   | 20190   | 5.4  | 8        | 100                 |
| RplL <sup>1</sup> | ribosomal protein L12                                       | 12743   | 4.6  | 7        | 100                 |
| RplL <sup>2</sup> |                                                             |         |      | 7        | 100                 |
| RplS              | ribosomal protein L19                                       | 13739   | 10.8 | 5        | 100                 |
| Sat               | sulfate adenylyltransferase                                 | 42857   | 5.7  | 22       | 100                 |
| SdhA              | succinate dehydrogenase (flavoprotein subunit)              | 65308   | 5.8  | 20       | 100                 |
| SigX              | RNA polymerase ECF-type sigma factor                        | 23165   | 6.1  | 7        | 100                 |
| ThrC              | threonine synthase                                          | 37440   | 5.3  | 12       | 100                 |
| TrmK              | tRNA:m1A22 methyl transferase                               | 23690   | 5.4  | 4        | 100                 |
| YceC              | unknown                                                     | 20754   | 5.5  | 1        | 100                 |
| YfmS              | soluble chemotaxis receptor                                 | 30306   | 4.7  | 14       | 100                 |
| YjoA              | unknown                                                     | 17782   | 5.8  | 12       | 100                 |
| YphP              | bacilliredoxin                                              | 15865   | 4.8  | 9        | 100                 |
| YqhS              | similar to 3-dehydroquinone dehydratase                     | 16421   | 5.3  | 6        | 100                 |
| YqiG              | similar to NADH-dependent falvin oxidoreductase             | 40780   | 5.3  | 20       | 100                 |
| YqkB              | unknown                                                     | 11757   | 5.0  | 8        | 100                 |
| YqkF              | NADPH-dependent 4-Hydroxy-2,3-trans-nonenal reductase       | 34696   | 5.3  | 13       | 100                 |
| YsnF              | unknown                                                     | 32258   | 4.4  | 9        | 100                 |
| YutE              | unknown                                                     | 16640   | 4.8  | 6        | 100                 |
| YvIB              | unknown                                                     | 37434   | 5.5  | 17       | 100                 |

**Tab. S47 nUPLC-ESI-MS-based protein identification for auranofin.** Protein names were taken from SubtiWiki database<sup>1</sup>. Superscripts indicate when a protein was identified in multiple spots. Superscripts indicate that the protein was identified in multiple spots on the gel image (see Fig. S8).

| protein           | protein name                                  | MW [Da] | pI  | PLGS score | peptides | coverage [%] |
|-------------------|-----------------------------------------------|---------|-----|------------|----------|--------------|
| ArsC              | arsenate reductase                            | 15585   | 4.7 | 1050       | 10       | 30           |
| Cah               | cephalosporin C deacetylase                   | 35784   | 5.4 | 14983      | 75       | 75           |
| CitB              | aconitase                                     | 99271   | 4.9 | 555        | 22       | 9            |
| CitZ              | citrate synthase II                           | 41702   | 5.5 | 298        | 1        | 2            |
| Hag               | flagellin protein                             | 32606   | 4.8 | 24064      | 71       | 91           |
| KatA <sup>1</sup> | vegetative catalase                           | 54757   | 6.1 | 3951       | 65       | 54           |
| KatA <sup>2</sup> |                                               |         |     | 1082       | 24       | 29           |
| KatA <sup>3</sup> |                                               |         |     | 2301       | 39       | 51           |
| KatA <sup>4</sup> |                                               |         |     | 9874       | 98       | 80           |
| MrgA              | mini-ferritin; DNA-binding stress protein     | 17321   | 4.6 | 6471       | 14       | 89           |
| YjoA              | bacillithiol S-transferase                    | 17781   | 5.8 | 3853       | 13       | 42           |
| YpfD              | unknown                                       | 42376   | 4.6 | 1179       | 14       | 15           |
| YrhB <sup>1</sup> | cystathionine lyase; homocysteine gamma-lyase | 40860   | 5.2 | 727        | 7        | 16           |
| YrhB <sup>2</sup> |                                               |         |     | 7932       | 47       | 48           |
| YuaE              | bacillithiol S-transferase                    | 19098   | 6.2 | 5659       | 35       | 62           |
| YwkD              | unknown                                       | 14823   | 5.4 | 436        | 2        | 6            |
| YxeP              | N-acetylcysteine deacetylase                  | 41526   | 5.3 | 1040       | 8        | 13           |

**Tab. S48 nUPLC-ESI-MS-based protein identification for BA234.** Protein names were taken from SubtiWiki database<sup>1</sup>. Superscripts indicate that the protein was identified in multiple spots on the gel image (see Fig. S9).

| protein           | protein name                                                     | MW [Da] | pI  | PLGS score | peptides | coverage [%] |
|-------------------|------------------------------------------------------------------|---------|-----|------------|----------|--------------|
| AcsA <sup>1</sup> | acetyl-CoA synthetase                                            | 64850   | 5.5 | 883        | 26       | 39           |
| AcsA <sup>2</sup> |                                                                  | 64850   | 5.5 | 2712       | 60       | 39           |
| AtpA              | ATP synthase (subunit alpha)                                     | 54564   | 5.0 | 1227       | 17       | 31           |
| CitZ              | citrate synthase II                                              | 41702   | 5.5 | 1281       | 25       | 50           |
| ClpP              | ATP-dependent Clp protease proteolytic subunit                   | 21668   | 5.0 | 6278       | 36       | 46           |
| DisA              | DNA integrity scanning protein; has diadenylate cyclase activity | 40708   | 5.6 | 1018       | 14       | 44           |
| FabG              | beta-ketoacyl-acyl carrier protein reductase                     | 25283   | 5.3 | 7521       | 36       | 71           |
| FbaA              | fructose-1,6-bisphosphate aldolase                               | 30381   | 5.0 | 2947       | 35       | 74           |
| GsiB              | general stress protein                                           | 13789   | 5.1 | 293        | 1        | 7            |
| HemH              | coproporphyrin ferrochelatase                                    | 35325   | 4.6 | 1204       | 18       | 34           |
| lolD              | formation of 5-deoxy-D-glucuronic acid                           | 70335   | 5.1 | 620        | 9        | 12           |
| LiaH <sup>1</sup> | unknown                                                          | 25682   | 6.2 | 6289       | 29       | 60           |
| LiaH <sup>2</sup> |                                                                  |         |     | 2590       | 14       | 48           |
| LiaH <sup>3</sup> |                                                                  |         |     | 915        | 4        | 20           |
| LiaR              | two-component response regulator                                 | 23110   | 5.0 | 1000       | 7        | 24           |
| LpdV              | 2-oxoisovalerate dehydrogenase                                   | 50404   | 5.0 | 3032       | 40       | 44           |
| MlpA              | control of proteolytic activity                                  | 45965   | 5.3 | 844        | 14       | 31           |
| PbpE              | penicillin-binding protein PBP 4*                                | 51404   | 4.8 | 2659       | 41       | 55           |
| PspA <sup>1</sup> | unknown                                                          | 25125   | 5.8 | 896        | 12       | 59           |
| PspA <sup>2</sup> |                                                                  |         |     | 4361       | 28       | 63           |
| PspA <sup>3</sup> |                                                                  |         |     | 1409       | 11       | 46           |
| SalA              | MRP family regulator                                             | 38614   | 5.2 | 1154       | 13       | 33           |
| SpeE              | spermidine synthase                                              | 31315   | 5.1 | 1251       | 24       | 66           |
| TcyA              | cystine and diaminopimelate ABC transporter (binding protein)    | 29495   | 9.0 | 726        | 3        | 12           |
| TrxB              | thioredoxin reductase                                            | 34497   | 5.0 | 9665       | 59       | 70           |
| YaaQ              | ci-di-AMP-binding PII-like protein                               | 11959   | 6.1 | 6875       | 18       | 46           |
| YbfO              | unknown                                                          | 51755   | 6.7 | 178        | 1        | 3            |
| YceC              | unknown                                                          | 21809   | 5.3 | 3629       | 29       | 63           |
| YceH              | unknown                                                          | 41646   | 5.7 | 5803       | 97       | 64           |
| YdaG              | putative pyridoxamine-5'-phosphate oxidase                       | 15867   | 5.2 | 2005       | 8        | 44           |
| YdbD              | unknown                                                          | 30238   | 4.9 | 4926       | 11       | 25           |
| Ydgl              | unknown                                                          | 23344   | 4.7 | 2096       | 14       | 47           |
| YfhM              | survival of ethanol stress                                       | 32737   | 6.1 | 2552       | 15       | 42           |
| YhdN              | aldo/keto reductase                                              | 17161   | 6.1 | 368        | 4        | 28           |
| YhfE              | unknown                                                          | 38711   | 5.9 | 3406       | 47       | 42           |
| YhfK              | unknown                                                          | 22745   | 5.2 | 3495       | 18       | 67           |
| YknY              | ABC transporter (ATP-binding protein)                            | 25255   | 5.8 | 1272       | 9        | 33           |
| YqiG              | unknown                                                          | 40779   | 5.2 | 2679       | 29       | 44           |
| YsnF              | unknown                                                          | 30706   | 4.2 | 5449       | 40       | 75           |
| YuaE              | bacillithiol S-transferase                                       | 19098   | 6.2 | 6097       | 23       | 48           |
| Yual              | unknown                                                          | 19830   | 5.1 | 6731       | 19       | 66           |
| YugJ              | unknown                                                          | 42705   | 5.2 | 9109       | 54       | 55           |
| YvgN              | glyoxal reductase                                                | 31643   | 5.1 | 5783       | 62       | 76           |
| YviB <sup>1</sup> | unknown                                                          | 41055   | 5.4 | 4747       | 28       | 50           |
| YviB <sup>2</sup> |                                                                  |         |     | 3848       | 25       | 49           |
| Ywfl              | GcvH:E2 amidotransferase                                         | 28883   | 5.1 | 3911       | 31       | 45           |
| YwrO              | unknown                                                          | 19942   | 5.2 | 5802       | 32       | 70           |

**Tab. S49 nUPLC-ESI-MS-based protein identification for CCCP. Part 1 of 2.** Protein names were taken from SubtiWiki database<sup>1</sup>. Superscripts indicate that the protein was identified in multiple spots on the gel image (see Fig. S10).

| protein           | protein name                                                                                    | MW [Da] | pI  | PLGS score | peptides | coverage [%] |
|-------------------|-------------------------------------------------------------------------------------------------|---------|-----|------------|----------|--------------|
| AcuA              | Gcn5-related N-acetyltransferase                                                                | 24316   | 5.0 | 973        | 9        | 39           |
| Ald               | L-alanine dehydrogenase                                                                         | 39658   | 5.1 | 11216      | 79       | 70           |
| BglA              | 6-phospho-beta-glucosidase                                                                      | 54806   | 4.6 | 1653       | 43       | 41           |
| BglH              | phospho-beta-glucosidase                                                                        | 53255   | 5.0 | 4515       | 74       | 46           |
| Ctc               | ribosomal protein                                                                               | 22042   | 4.2 | 8256       | 40       | 53           |
| Def               | formylmethionine deformylase                                                                    | 20642   | 5.5 | 1848       | 6        | 34           |
| Dps               | mini-ferritin                                                                                   | 16583   | 4.4 | 11774      | 59       | 93           |
| EtfA              | electron transfer flavoprotein                                                                  | 34519   | 4.7 | 5108       | 58       | 58           |
| EtfB              | electron transfer flavoprotein                                                                  | 28499   | 4.2 | 6999       | 44       | 67           |
| FadR              | transcriptional repressor                                                                       | 21964   | 6.1 | 3828       | 31       | 41           |
| FriB              | fructoselysine-6-P-glycosidase                                                                  | 36852   | 5.4 | 10338      | 48       | 46           |
| GsiB              | general stress protein                                                                          | 13789   | 5.1 | 2417       | 17       | 37           |
| HisA              | phosphoribosylformimino-5-aminoimidazole carboxamide ribotide isomerase                         | 26512   | 4.8 | 10828      | 38       | 69           |
| HisB              | imidazoleglycerol-phosphate dehydratase                                                         | 21535   | 5.6 | 4054       | 34       | 34           |
| HisD              | histidinol dehydrogenase                                                                        | 46227   | 4.8 | 6015       | 80       | 65           |
| HisF              | imidazole glycerol phosphate synthase                                                           | 27277   | 5.2 | 4583       | 45       | 69           |
| HisG              | ATP phosphoribosyltransferase                                                                   | 23606   | 4.5 | 10498      | 55       | 85           |
| HisH <sup>1</sup> | imidazole glycerol phosphate synthase                                                           | 23287   | 5.7 | 2161       | 20       | 53           |
| HisH <sup>2</sup> |                                                                                                 |         |     | 3922       | 29       | 68           |
| HisI              | phosphoribosyl-AMP cyclohydrolase /phosphoribosyl-ATP pyrophosphohydrolase                      | 23885   | 4.6 | 4821       | 26       | 47           |
| LpdV              | 2-oxoisovalerate dehydrogenase                                                                  | 50404   | 5.0 | 2005       | 42       | 41           |
| MelA              | alpha-galactosidase                                                                             | 49231   | 5.8 | 592        | 6        | 15           |
| MetN              | methionine ABC transporter (ATP-binding protein)                                                | 30336   | 8.7 | 1072       | 14       | 32           |
| MurF              | UDP-N-acetylmuramoyl-L-alanyl-D-glutamyl-meso-2,6-diaminopimeloyl-D-alanyl-D-alanine synthetase | 49691   | 5.3 | 2536       | 34       | 41           |
| NagBB             | glucosamine-6-phosphate deaminase                                                               | 27271   | 5.8 | 4035       | 24       | 67           |
| NfrA              | FMN-containing NADPH-linked nitro/flavin reductase                                              | 28302   | 5.7 | 4462       | 24       | 45           |
| OhrB              | unknown                                                                                         | 14591   | 4.7 | 2584       | 24       | 60           |
| RocA <sup>1</sup> | 3-hydroxy-1-pyrroline-5-carboxylate dehydrogenase                                               | 56284   | 5.6 | 1853       | 34       | 47           |
| RocA <sup>2</sup> |                                                                                                 |         |     | 4821       | 59       | 65           |
| RsbW              | anti-sigma factor; protein serine kinase                                                        | 17981   | 4.3 | 9055       | 42       | 67           |
| SacA              | phosphosucrase                                                                                  | 54779   | 5.4 | 2827       | 31       | 47           |
| Tsf               | elongation factor Ts                                                                            | 32333   | 5.0 | 727        | 10       | 20           |
| TyrA              | prephenate dehydrogenase                                                                        | 41408   | 5.5 | 2554       | 34       | 49           |

**Tab. S50 nUPLC-ESI-MS-based protein identification for CCCP. Part 2 of 2.** Protein names were taken from SubtiWiki database<sup>1</sup>. Superscripts indicate that the protein was identified in multiple spots on the gel image (see Fig. S10).

| protein           | protein name                          | MW [Da] | pI  | PLGS score | peptides | coverage [%] |
|-------------------|---------------------------------------|---------|-----|------------|----------|--------------|
| YaaQ              | c-di-AMP-binding PII-like protein     | 11959   | 6.1 | 6160       | 21       | 46           |
| YcsN              | unknown                               | 34118   | 5.3 | 3337       | 31       | 46           |
| YdaE              | lyxose isomerase                      | 19239   | 4.9 | 1222       | 10       | 24           |
| YdbD <sup>1</sup> | unknown                               | 30238   | 4.9 | 3454       | 10       | 24           |
| YdbD <sup>2</sup> |                                       |         |     | 6757       | 32       | 30           |
| YerA              | unknown                               | 66602   | 5.8 | 1489       | 39       | 45           |
| YezE              | putative transcriptional regulator    | 21873   | 4.9 | 1809       | 12       | 45           |
| YfkM              | glyoxalase III-like enzyme            | 18851   | 4.7 | 4841       | 50       | 54           |
| YhdF              | unknown                               | 31489   | 5.2 | 4637       | 33       | 45           |
| YhdN <sup>1</sup> | aldo/keto reductase                   | 37289   | 4.8 | 13675      | 56       | 83           |
| YhdN <sup>2</sup> |                                       |         |     | 2795       | 10       | 34           |
| YjbC              | unknown                               | 23105   | 5.1 | 2724       | 19       | 52           |
| YockK             | general stress protein                | 18819   | 4.3 | 6597       | 37       | 85           |
| Ypfd              | unknown                               | 42376   | 4.6 | 1583       | 20       | 30           |
| YrbE              | unknown                               | 37764   | 5.7 | 2902       | 35       | 53           |
| YsiB              | 3-hydroxyacyl-CoA dehydratase         | 27536   | 5.0 | 8800       | 50       | 60           |
| YsnF              | unknown                               | 30706   | 4.2 | 15276      | 84       | 78           |
| YtxH              | unknown                               | 16544   | 5.1 | 7830       | 70       | 72           |
| YukJ              | unknown                               | 25538   | 4.4 | 2404       | 28       | 34           |
| YvyD              | ribosome hibernation promoting factor | 21966   | 5.2 | 7030       | 57       | 68           |
| YxaB              | putative exopolysaccharide synthase   | 39739   | 4.5 | 8781       | 55       | 62           |
| YxbG              | unknown                               | 29414   | 4.5 | 1788       | 15       | 48           |

**Tab. S51 nUPLC-ESI-MS-based protein identification for cinnamaldehyde.** Protein names were taken from SubtiWiki database<sup>1</sup>. Superscripts indicate that the protein was identified in multiple spots on the gel image (see Fig. S11).

| protein           | protein name                                        | MW [Da] | pI  | PLGS score | peptides | coverage [%] |
|-------------------|-----------------------------------------------------|---------|-----|------------|----------|--------------|
| Cah               | cephalosporin C deacetylase                         | 35784   | 5.4 | 6577.41    | 35       | 65           |
| ClpP              | ATP-dependent Clp protease proteolytic subunit      | 21668   | 5.0 | 6485.99    | 17       | 53           |
| DnaK              | class I heat-shock protein (molecular chaperone)    | 65962   | 4.6 | 11461.70   | 139      | 85           |
| FabG              | beta-ketoacyl-acyl carrier protein reductase        | 25283   | 5.3 | 10841.58   | 47       | 60           |
| GrpE              | heat-shock protein                                  | 21669   | 4.3 | 3224.89    | 19       | 31           |
| IolS              | unknown                                             | 35146   | 5.4 | 3316.54    | 33       | 55           |
| LeuD              | 3-isopopylmalate dehydratase                        | 23007   | 4.6 | 3468.53    | 37       | 34           |
| NfrA              | FMN-containing NADPH-linked nitro/flavin reductase  | 28302   | 5.7 | 1543.46    | 10       | 40           |
| PbpC              | penicillin-binding protein 3                        | 74360   | 6.2 | 2116.73    | 28       | 29           |
| PtsI              | phosphotransferase system (PTS) enzyme I            | 63039   | 4.6 | 12297.67   | 169      | 76           |
| SalA              | MPR family regulator                                | 38614   | 5.2 | 4399.83    | 40       | 45           |
| SodA              | superoxide dismutase                                | 21433   | 5.0 | 20481.95   | 46       | 93           |
| SuhB              | nucleotidase                                        | 29741   | 5.1 | 4629.27    | 39       | 55           |
| ThrS <sup>1</sup> | threonyl-tRNA synthetase (major)                    | 73468   | 5.2 | 4710.60    | 106      | 64           |
| ThrS <sup>2</sup> |                                                     |         |     | 1370.10    | 34       | 29           |
| YaaE              | pyridoxal-5-phosphate synthase (glutaminase domain) | 22476   | 5.1 | 21574.71   | 44       | 73           |
| YjdA              | unknown                                             | 27431   | 5.7 | 1810.73    | 29       | 30           |
| YqiG              | unknown                                             | 40779   | 5.2 | 1079.60    | 13       | 15           |
| YugJ              | unknown                                             | 42705   | 5.2 | 6905.62    | 46       | 68           |
| YulF              | minor NADP-dependent scyllo-inositol dehydrogenase  | 36492   | 5.2 | 2027.01    | 34       | 33           |

**Tab. S52 nUPLC-ESI-MS-based protein identification for ciprofloxacin.** Protein names were taken from SubtiWiki database<sup>1</sup>.

| protein | protein name                                                | MW [Da] | pI  | PLGS score | peptides | coverage [%] |
|---------|-------------------------------------------------------------|---------|-----|------------|----------|--------------|
| Apt     | adenine phosphoribosyltransferase                           | 18863   | 4.7 | 9476.61    | 24       | 66           |
| Ctc     | general stress protein                                      | 22042   | 4.2 | 17147.20   | 54       | 50           |
| DinB    | nuclease inhibitor                                          | 19891   | 5.6 | 6896.76    | 47       | 97           |
| DnaC    | Replicative DNA helicase                                    | 50544   | 4.6 | 226.183    | 21       | 54           |
| EfeM    | iron uptake system component                                | 42769   | 4.7 | 8508.50    | 59       | 58           |
| Fur     | ferric uptake regulation protein                            | 17416   | 5.3 | 4124.02    | 22       | 60           |
| GreA    | transcription elongation factor                             | 17260   | 4.5 | 15277.65   | 37       | 79           |
| GspA    | general stress protein                                      | 33500   | 5.1 | 6633.55    | 48       | 98           |
| GtaB    | UTP-glucose-1-phosphate uridylyltransferase                 | 33049   | 4.9 | 20579.84   | 106      | 88           |
| OhrB    | organic hydroperoxide resistance protein                    | 14591   | 4.7 | 25773.42   | 29       | 77           |
| Pgm     | 2,3-bisphosphoglycerate-independent phosphoglycerate mutase | 56273   | 5.2 | 1695.051   | 35       | 58           |
| PurH    | bifunctional purine biosynthesis protein                    | 55719   | 5.1 | 6233.26    | 53       | 65           |
| RbsW    | serine-protein kinase                                       | 17981   | 4.3 | 11352.46   | 49       | 75           |
| ThiE    | thiamine-phosphate synthase                                 | 23666   | 5.1 | 9791.47    | 33       | 61           |
| YceD    | general stress protein                                      | 20681   | 4.3 | 28209.68   | 69       | 95           |
| YdaD    | general stress protei                                       | 31062   | 4.8 | 2551.04    | 18       | 49           |
| YdaG    | general stress protein                                      | 15867   | 5.2 | 6482.83    | 33       | 73           |
| Yeel    | transcriptional regulator                                   | 26297   | 4.3 | 7310.90    | 30       | 73           |
| YfhH    | hypothetical protein                                        | 12001   | 4.6 | 34405.25   | 28       | 88           |
| YIbN    | hypothetical protein                                        | 19981   | 4.3 | 3427.48    | 10       | 74           |
| YsnA    | non-canonical purine NTP pyrophosphatase                    | 21919   | 5.0 | 9920.10    | 45       | 75           |
| YtxH    | hypothetical protein                                        | 16544   | 5.1 | 5381.43    | 38       | 61           |
| YtzG    | 16S rRNA pseudouridine synthase                             | 26772   | 5.5 | 8460.87    | 39       | 78           |
| YugI    | general stress protein                                      | 14274   | 5.9 | 6192.22    | 9        | 78           |
| YugK    | NADH-dependent butanol dehydrogenase 2                      | 43378   | 4.6 | 22443.02   | 157      | 83           |
| YvaK    | carboxylesterase                                            | 28392   | 5.0 | 3383.07    | 30       | 78           |
| YvyD    | sigma-54 modulation protein                                 | 21966   | 5.2 | 7333.49    | 49       | 59           |
| YwqK    | hypothetical protein                                        | 18205   | 4.5 | 2998.59    | 14       | 55           |

**Tab. S53 nUPLC-ESI-MS-based protein identification for closthioamide.** Protein names were taken from SubtiWiki database<sup>1</sup>. Superscripts indicate that the protein was identified in multiple spots on the gel image (see Fig. S13).

| protein           | protein name                                         | MW [Da] | pI  | PLGS score | peptides | coverage [%] |
|-------------------|------------------------------------------------------|---------|-----|------------|----------|--------------|
| ArgS              | arginyl-tRNA synthetase                              | 62683   | 5.1 | 21560      | 109      | 85           |
| AzoR2             | azoreductase                                         | 23272   | 5.1 | 8975       | 35       | 76           |
| GbsB <sup>1</sup> | choline dehydrogenase (FAD-dependent)                | 43392   | 4.9 | 13032      | 69       | 58           |
| GbsB <sup>2</sup> |                                                      | 43392   | 4.9 | 3032       | 18       | 39           |
| GlpX              | class II fructose-1,6-bisphosphatase                 | 33951   | 5.1 | 16122      | 59       | 61           |
| GltX              | glutamyl-tRNA synthetase                             | 55687   | 5.0 | 16893      | 59       | 71           |
| GuaA              | GMP synthetase                                       | 57812   | 4.7 | 2731       | 28       | 47           |
| IlvE              | branched-chain amino acid aminotransferase           | 39651   | 5.0 | 13649      | 64       | 68           |
| Maf               | nucleotide pyrophosphatase                           | 21281   | 5.7 | 2569       | 11       | 30           |
| MenB              | naphthoate synthase                                  | 29880   | 5.3 | 6887       | 20       | 46           |
| MhqO              | hydroquinone-specific dioxygenase                    | 35056   | 4.8 | 14057      | 42       | 65           |
| MnaA              | UDP-N-acetylglucosamine 2-epimerase                  | 42634   | 5.5 | 934        | 25       | 68           |
| MrgA              | mini-ferritin; DNA-binding stress protein            | 17321   | 4.6 | 6959       | 19       | 78           |
| MtnK              | 5-methylthioribose kinase                            | 45319   | 4.9 | 11999      | 55       | 60           |
| MurD              | UDP-N-acetylmuramoyl-L-alanyl-D-glutamate synthetase | 49619   | 5.6 | 6297       | 82       | 61           |
| MurQ              | N-acetyl-muramic acid-6P etherase                    | 32679   | 5.4 | 16531      | 28       | 68           |
| NdoA              | mRNA interferase                                     | 12969   | 4.9 | 13947      | 11       | 63           |
| OhrA              | peroxiredoxin                                        | 14858   | 5.1 | 18262      | 23       | 89           |
| PatA              | aminotransferase                                     | 43508   | 6.0 | 2992       | 28       | 44           |
| PckA              | phosphoenolpyruvate carboxykinase                    | 58235   | 5.1 | 11399      | 71       | 66           |
| PurA              | adenylosuccinate synthetase                          | 47642   | 5.5 | 10769      | 72       | 81           |
| PurM              | phosphoribosylaminoimidazole synthetase              | 37028   | 4.5 | 507        | 12       | 32           |
| RapG              | response regulator aspartate phosphatase             | 42842   | 4.8 | 1763       | 28       | 53           |
| RibE              | riboflavin synthase                                  | 23481   | 5.9 | 1069       | 17       | 53           |
| ThiE              | thiamine-phosphate pyrophosphorylase                 | 23666   | 5.1 | 7015       | 23       | 59           |
| ThiQ              | sporulation protein                                  | 47123   | 5.0 | 5267       | 38       | 42           |
| YcnD              | NADPH-FMN oxidoreductase                             | 27850   | 5.1 | 3343       | 7        | 22           |
| YcnE              | unknown                                              | 10937   | 4.9 | 14956      | 19       | 81           |
| Ydgl              | unknown                                              | 23344   | 4.7 | 1167       | 12       | 40           |
| YhdN              | aldo/keto reductase, specific for NADP               | 37289   | 4.8 | 20705      | 45       | 75           |
| YopQ              | unknown                                              | 53504   | 5.2 | 3194       | 41       | 53           |
| YopX              | unknown                                              | 15184   | 4.3 | 8721       | 11       | 68           |
| YorG              | unknown                                              | 36603   | 4.8 | 5046       | 36       | 66           |
| YsnF              | unknown                                              | 30706   | 4.2 | 2891       | 29       | 80           |
| YtpQ              | unknown                                              | 31043   | 5.3 | 4022       | 29       | 49           |
| YtsJ              | NADP-dependent malate dehydrogenase                  | 43639   | 5.1 | 6279       | 42       | 74           |
| YxjG              | putative methionine synthetase                       | 43137   | 5.0 | 15658      | 81       | 77           |

**Tab. S54 nUPLC-ESI-MS-based protein identification for cXRX.** Protein names were taken from SubtiWiki database<sup>1</sup>.

| protein | protein name                      | MW [Da] | pI  | PLGS score | peptides | coverage [%] |
|---------|-----------------------------------|---------|-----|------------|----------|--------------|
| GroEL   | chaperonin, co-repressof for HrcA | 24422   | 4.5 | 35524      | 179      | 79           |
| HslO    | putative disulfide bon chaperone  | 31791   | 4.7 | 14737      | 53       | 93           |
| MinD    | cell division inhibitor           | 29388   | 5.0 | 8767       | 48       | 62           |
| PepF    | oligoendopeptidase                | 77024   | 5.5 | 8410       | 102      | 52           |
| TpiA    | triosphosphate isomerase          | 27012   | 4.8 | 4669       | 30       | 58           |

**Tab. S55 nUPLC-ESI-MS-based protein identification for 5% DMSO.** Protein names were taken from SubtiWiki database<sup>1</sup>. Superscripts indicate that the protein was identified in multiple spots on the gel image (see Fig. S15).

| protein           | protein name                                                                                   | MW [Da] | pI   | PLGS score | peptides | coverage [%] |
|-------------------|------------------------------------------------------------------------------------------------|---------|------|------------|----------|--------------|
| Adk               | adenylate kinase                                                                               | 24104   | 4.4  | 8637       | 53       | 86           |
| ClpC              | AAA unfoldase; ATPase subunit of the ClpC-ClpP protease                                        | 90063   | 5.7  | 1722       | 41       | 37           |
| ClpP              | ATP-dependent Clp protease proteolytic subunit                                                 | 21668   | 5.0  | 3599       | 23       | 26           |
| DapA <sup>1</sup> | dihydrodipicolinate synthase                                                                   | 31022   | 4.9  | 2919       | 30       | 71           |
| DapA <sup>2</sup> |                                                                                                |         |      | 6256       | 51       | 72           |
| Dps <sup>1</sup>  | mini-ferritin                                                                                  | 16583   | 4.4  | 2392       | 16       | 30           |
| Dps <sup>2</sup>  |                                                                                                |         |      | 2715       | 14       | 30           |
| Dps <sup>3</sup>  |                                                                                                |         |      | 2303       | 16       | 36           |
| Dps <sup>4</sup>  |                                                                                                |         |      | 7096       | 40       | 74           |
| FbaA <sup>1</sup> | fructose-1,6-bisphosphate aldolase                                                             | 30381   | 5.0  | 1959       | 23       | 39           |
| FbaA <sup>2</sup> |                                                                                                |         |      | 601        | 2        | 9            |
| FbaA <sup>3</sup> |                                                                                                |         |      | 1234       | 13       | 20           |
| GreA              | transcription elongation factor                                                                | 17260   | 4.5  | 5226       | 19       | 61           |
| GrpE              | heat-shock protein                                                                             | 21669   | 4.3  | 7387       | 42       | 41           |
| GsiB              | general stress protein                                                                         | 13789   | 5.1  | 2597       | 18       | 53           |
| GtaB <sup>1</sup> | UTP-glucose-1-phosphate uridylyltransferase                                                    | 33049   | 4.9  | 1344       | 14       | 33           |
| GtaB <sup>2</sup> |                                                                                                |         |      | 7537       | 54       | 60           |
| GtaB <sup>3</sup> |                                                                                                |         |      | 2766       | 31       | 53           |
| IleS              | isoleucyl-tRNA synthetase                                                                      | 104778  | 5.2  | 917        | 39       | 22           |
| IlvD              | dihydroxy-acid dehydratase (2,3-dihydroxy-3-methylbutanoate, 2,3-dihydroxy-3-methylpentanoate) | 59462   | 5.2  | 1510       | 54       | 43           |
| KatE              | catalase 2                                                                                     | 77431   | 5.8  | 1635       | 44       | 40           |
| MalS              | malate dehydrogenase (decarboxylating)                                                         | 62110   | 4.9  | 5233       | 53       | 54           |
| MetE              | methionine synthase                                                                            | 86752   | 4.9  | 3606       | 62       | 43           |
| OhrB              | unknown                                                                                        | 14591   | 4.7  | 1592       | 9        | 39           |
| RpsC              | ribosomal prtein S3                                                                            | 24307   | 10.1 | 12578      | 78       | 82           |
| RsbW              | anti-sigma factor, prtein serine kinase                                                        | 17981   | 4.3  | 3096       | 30       | 75           |
| Sat               | sulfate adenyllyltransferase                                                                   | 42856   | 5.6  | 2147       | 22       | 41           |
| ThiD              | 4-amino-5-hydroxymethyl-2-methylpyrimidinepyrophosphate kinase                                 | 28998   | 4.9  | 2186       | 21       | 56           |
| ThyA              | thymidylate synthase A                                                                         | 32786   | 5.5  | 283        | 1        | 4            |
| YcdF              | unknown                                                                                        | 27758   | 5.3  | 2118       | 10       | 22           |
| YceE              | unknown                                                                                        | 20935   | 4.4  | 9800       | 23       | 53           |
| YdaD              | unknown                                                                                        | 31062   | 4.8  | 8610       | 60       | 69           |
| YdaE              | lyxose isomerase                                                                               | 19239   | 4.9  | 2815       | 21       | 32           |
| Yeel              | unknown                                                                                        | 26297   | 4.3  | 2464       | 15       | 33           |
| YfkM <sup>1</sup> | glyoxalase III-like enzyme                                                                     | 18851   | 4.7  | 4902       | 42       | 44           |
| YfkM <sup>2</sup> |                                                                                                |         |      | 5966       | 47       | 55           |
| YhdF              | unknown                                                                                        | 31489   | 5.2  | 2301       | 27       | 36           |
| YloC              | unknown                                                                                        | 33609   | 4.9  | 3193       | 31       | 45           |
| YpfD <sup>1</sup> | unknown                                                                                        | 42376   | 4.6  | 3145       | 37       | 48           |
| YpfD <sup>2</sup> |                                                                                                |         |      | 1771       | 26       | 40           |
| YsnF <sup>1</sup> | unknown                                                                                        | 30706   | 4.2  | 20132      | 115      | 81           |
| YsnF <sup>2</sup> |                                                                                                |         |      | 3703       | 28       | 66           |
| YsnF <sup>3</sup> |                                                                                                |         |      | 5937       | 52       | 79           |
| YsnF <sup>4</sup> |                                                                                                |         |      | 4636       | 39       | 60           |
| YtxH              | unknown                                                                                        | 16544   | 5.1  | 9838       | 49       | 55           |
| YvgN              | glyoxal reductase                                                                              | 31643   | 5.1  | 1922       | 27       | 25           |
| YvrE              | glucoco-lactonase                                                                              | 33183   | 4.6  | 2964       | 40       | 50           |
| YxaB <sup>1</sup> | putative exopolysaccharide synthase                                                            | 39739   | 4.5  | 12229      | 80       | 80           |
| YxaB <sup>2</sup> |                                                                                                |         |      | 3388       | 38       | 45           |



**Tab. S56 nUPLC-ESI-MS-based protein identification for GE2270A.** Protein names were taken from SubtiWiki database<sup>1</sup>.

| <b>protein</b> | <b>protein name</b>                       | <b>MW<br/>[Da]</b> | <b>pI</b> | <b>PLGS<br/>score</b> | <b>peptides</b> | <b>coverage<br/>[%]</b> |
|----------------|-------------------------------------------|--------------------|-----------|-----------------------|-----------------|-------------------------|
| CheV           | CheA modulator                            | 34611              | 4.6       | 5698                  | 45              | 84                      |
| Nfo            | type IV apurinic/aprimidinic endonuclease | 33047              | 5.4       | 2878                  | 31              | 52                      |
| QueF           | nitrile reductase                         | 19362              | 4.9       | 909                   | 6               | 50                      |

**Tab. S57 nUPLC-ESI-MS-based protein identification for kirromycin.** Protein names were taken from SubtiWiki database<sup>1</sup>.

| <b>protein</b> | <b>protein name</b>                              | <b>MW<br/>[Da]</b> | <b>pI</b> | <b>PLGS<br/>score</b> | <b>peptides</b> | <b>coverage<br/>[%]</b> |
|----------------|--------------------------------------------------|--------------------|-----------|-----------------------|-----------------|-------------------------|
| DnaK           | class I heat-shock protein (molecular chaperone) | 65962              | 4.6       | 14142                 | 91              | 79                      |
| GrpE           | heat shock protein                               | 21669              | 4.3       | 2226                  | 12              | 31                      |
| GuaC           | GMP reductase                                    | 35827              | 6.1       | 6728                  | 50              | 78                      |
| HemH           | coproporphyrin ferrochelatase                    | 35325              | 4.6       | 215                   | 80              | 26                      |
| YhcB           | unknown                                          | 19003              | 4.6       | 611                   | 3               | 21                      |
| YojG           | N-acetylglucosamin-malate deacetylase            | 25560              | 4.7       | 1016                  | 13              | 44                      |
| YvlB           | unknown                                          | 41055              | 5.4       | 7146                  | 37              | 66                      |

**Tab. S58 nUPLC-ESI-MS-based protein identification for KKL-35 and KKL-40.** Protein names were taken from SubtiWiki database<sup>1</sup>. Superscripts indicate that the protein was identified in multiple spots on the gel image (see Fig. S19 and S20).

| protein           | protein name                                                            | MW [Da] | pI  | PLGS score | peptides | coverage [%] |
|-------------------|-------------------------------------------------------------------------|---------|-----|------------|----------|--------------|
| AhpC <sup>1</sup> | alkyl hydroperoxide reductase (small subunit)                           | 20614   | 4.3 | 23466      | 43       | 95           |
| AhpC <sup>2</sup> |                                                                         | 20614   | 4.3 | 12861      | 28       | 78           |
| AhpF <sup>1</sup> | alkyl hydroperoxide reductase (large subunit)                           | 54839   | 4.7 | 7685       | 113      | 64           |
| AhpF <sup>2</sup> |                                                                         | 54839   | 4.7 | 1243       | 34       | 36           |
| AhpF <sup>3</sup> |                                                                         | 54839   | 4.7 | 4532       | 57       | 52           |
| AhpF <sup>4</sup> |                                                                         | 54839   | 4.7 | 4549       | 62       | 51           |
| BrxA              | bacilliredoxin                                                          | 32606   | 4.8 | 3311       | 10       | 45           |
| CtC               | ribosomal protein                                                       | 22042   | 4.2 | 3515       | 13       | 41           |
| DhbA              | 2,3-dihydro-2,3-dihydroxybenzoate dehydrogenase                         | 27436   | 5.3 | 20634      | 63       | 80           |
| Fur               | transcriptional repressor Fur family                                    | 17416   | 5.3 | 3330       | 13       | 38           |
| GreA              | transcription elongation factor                                         | 17260   | 4.5 | 33270      | 39       | 79           |
| GuaB              | IMP dehydrogenase                                                       | 52957   | 6.2 | 5642       | 50       | 70           |
| HisA              | phosphoribosylformimino-5-aminoimidazole carboxamide ribotide isomerase | 26512   | 4.8 | 21854      | 48       | 79           |
| HisG              | ATP phosphoribosyltransferase                                           | 23606   | 4.5 | 5105       | 16       | 73           |
| IscU              | sulfur shuttle protein                                                  | 16155   | 4.7 | 379        | 5        | 47           |
| KatA <sup>1</sup> | vegetative catalase                                                     | 54757   | 6.1 | 10683      | 84       | 63           |
| KatA <sup>2</sup> |                                                                         | 54757   | 6.1 | 1182       | 11       | 57           |
| KatA <sup>3</sup> |                                                                         | 54757   | 6.1 | 1453       | 27       | 40           |
| MrgA              | mini-ferritin, DANN-binding stress protein                              | 17321   | 4.6 | 7532       | 15       | 57           |
| NfrA              | FMN-containing NADPH-linked nitro/flavin reductase                      | 28302   | 5.7 | 11430      | 26       | 58           |
| OhrB              | general stress protein                                                  | 14591   | 4.7 | 2542       | 10       | 51           |
| SufD              | Fes scaffold                                                            | 48263   | 5.0 | 5971       | 41       | 58           |
| Tpx               | unknown                                                                 | 18204   | 4.7 | 4622       | 17       | 62           |
| TrxA              | thioredoxin                                                             | 32606   | 4.8 | 2823       | 6        | 34           |
| YcsN              | unknown                                                                 | 34118   | 5.3 | 5954       | 27       | 46           |
| YfkM              | glyoxalase III-like enzyme                                              | 18851   | 4.7 | 8142       | 32       | 62           |
| YhzC              | unknown                                                                 | 9112    | 7.1 | 314        | 6        | 37           |
| YtxH              | general stress protein                                                  | 16544   | 5.1 | 3952       | 18       | 78           |
| YukJ              | unknown                                                                 | 25538   | 4.4 | 1649       | 9        | 40           |
| YvyD              | ribosome hibernation promoting factor                                   | 21966   | 5.2 | 4178       | 16       | 56           |
| YwrO              | unknown                                                                 | 19942   | 5.2 | 4584       | 21       | 67           |

**Tab. S59 nUPLC-ESI-MS-based protein identification for KKL-55.** Protein names were taken from SubtiWiki database<sup>1</sup>. Superscripts indicate that the protein was identified in multiple spots on the gel image (see Fig. S21).

| protein            | protein name                                                     | MW [Da] | pI  | PLGS score | peptides | coverage [%] |
|--------------------|------------------------------------------------------------------|---------|-----|------------|----------|--------------|
| AhpC               | alkyl hydroperoxide reductase (small subunit)                    | 20614   | 4.3 | 14147      | 56       | 80           |
| AhpF               | alkyl hydroperoxide reductase (large subunit)/NADH dehydrogenase | 54839   | 4.7 | 346        | 17       | 30           |
| AzoR1              | azoreductase                                                     | 22962   | 5.0 | 1947       | 29       | 88           |
| ClpP               | ATP-dependent Clp protease proteolytic subunit                   | 21668   | 5.0 | 893        | 13       | 56           |
| DhbA               | 2,3-dihydro-2,3-dihydroxybenzoate dehydrogenase                  | 27436   | 5.3 | 197        | 6        | 28           |
| DhbB               | isochorismatase                                                  | 35084   | 4.4 | 2054       | 16       | 53           |
| FlgK               | flagellar hook-filament junction protein                         | 54321   | 4.4 | 2968       | 25       | 53           |
| GroEL <sup>1</sup> | chaperonin; co-repressor for HrcA                                | 57388   | 4.5 | 1881       | 39       | 44           |
| GroEL <sup>2</sup> |                                                                  |         |     | 754        | 25       | 39           |
| KatA               | vegetative catalase                                              | 54757   | 6.1 | 379        | 10       | 16           |
| NagB               | glucosamine-6-phosphate deaminase                                | 27271   | 5.8 | 330        | 6        | 28           |
| PepF               | oligoendopeptidase                                               | 77024   | 5.5 | 773        | 22       | 33           |
| TenA               | thiaminase II                                                    | 27399   | 5.0 | 123        | 8        | 30           |
| YcnD               | NADPH-FMN oxidoreductase                                         | 27850   | 5.1 | 127        | 3        | 17           |
| YhjG               | unknown                                                          | 54322   | 6.7 | 1027       | 26       | 36           |
| YneT               | unknown                                                          | 14979   | 5.3 | 209        | 5        | 47           |
| YqiG               | unknown                                                          | 40779   | 5.2 | 789        | 9        | 20           |
| YugJ               | unknown                                                          | 42705   | 5.2 | 1395       | 17       | 40           |
| YwrO               | unknown                                                          | 19942   | 5.2 | 3012       | 12       | 50           |

**Tab. S60 nUPLC-ESI-MS-based protein identification for linezolid.** Protein names were taken from SubtiWiki database<sup>1</sup>. Superscripts indicate that the protein was identified in multiple spots on the gel image (see Fig. S22).

| protein           | protein name                                             | MW [Da] | pI  | PLGS score | peptides | coverage [%] |
|-------------------|----------------------------------------------------------|---------|-----|------------|----------|--------------|
| Adk               | adenylate kinase                                         | 24104   | 4.5 | 7371       | 40       | 66           |
| CcpA              | transcriptional regulator LacI family                    | 36917   | 5.1 | 7342       | 87       | 89           |
| CodY              | transcriptional pleotropic repressor                     | 28995   | 4.8 | 27872      | .97      | 83           |
| CspR              | tRNA (Um34/Cm34) methyltransferase homolog               | 18565   | 5.9 | 1020       | 12       | 36           |
| CwlO              | enopeptidase-type autolysin                              | 51002   | 5.3 | 4123       | 32       | 47           |
| Fur               | transcriptional repressor Fur family                     | 17416   | 5.3 | 3268       | 19       | 43           |
| HslO              | putative disulfide bond chaperone                        | 31791   | 4.7 | 8461       | 74       | 48           |
| IolS              | unknown                                                  | 35146   | 5.4 | 10059      | 59       | 74           |
| MnaA              | UDP-N-acetylglucosamine 2-epimerase                      | 42607   | 5.5 | 4271       | 28       | 57           |
| NusG              | sequence-specific RNA polymerase pause factor            | 20113   | 5.3 | 14781      | 46       | 69           |
| PrfB              | peptide chain release factor 2                           | 42046   | 4.9 | 9751       | 77       | 84           |
| PurC              | phosphoribosylaminoimidazole succinocarboxamide synthase | 27443   | 4.9 | 19134      | 88       | 90           |
| PyrB              | aspartate carbamoyltransferase                           | 34202   | 5.5 | 5394       | 47       | 47           |
| PyrC              | dihydroorotase                                           | 46503   | 5.2 | 11305      | 79       | 83           |
| RplJ              | ribosomal protein L10                                    | 18067   | 5.2 | 28409      | 99       | 95           |
| RpsF <sup>1</sup> | ribosomal protein S6                                     | 11117   | 5.0 | 21909      | 35       | 87           |
| RpsF <sup>2</sup> |                                                          | 11117   | 5.0 | 7639       | 12       | 56           |
| SpeB              | agmatinase                                               | 32396   | 4.8 | 11935      | 69       | 68           |
| SsbA              | single-strand DNA-binding protein                        | 18731   | 4.8 | 20221      | 34       | 80           |
| SucD              | succinyl-CoA synthetase (alpha subunit)                  | 31362   | 5.6 | 1586       | 17       | 35           |
| TagD              | glycerol-3-phosphate cytidyltransferase                  | 15261   | 5.7 | 5247       | 30       | 68           |
| TasA              | major component of biofilm matrix                        | 28287   | 5.4 | 2908       | 17       | 42           |
| TrmK              | tRNA:m1A22 methyl transferase                            | 23690   | 5.2 | 8639       | 25       | 60           |
| TrxB              | thioredoxin reductase (NADPH)                            | 34497   | 5.0 | 6903       | 38       | 54           |
| YceE              | general stress protein                                   | 20935   | 4.4 | 18711      | 38       | 46           |
| YfmS              | soluble chemotaxis receptor                              | 30305   | 4.5 | 5673       | 17       | 52           |
| YfmT              | vanillin dehydrogenase                                   | 53287   | 5.1 | 2094       | 31       | 60           |
| YjcJ              | cystathionine beta-lyase                                 | 42464   | 5.8 | 8808       | 54       | 65           |
| YlbN              | unknown                                                  | 19981   | 4.3 | 1944       | 6        | 41           |
| Yoch              | peptidoglycan hydrolase                                  | 30163   | 8.8 | 5772       | 12       | 55           |
| YutI              | putative Fe-S scaffold protein                           | 12416   | 4.2 | 26470      | 15       | 58           |
| YwtE              | unknown                                                  | 31568   | 4.8 | 2790       | 24       | 72           |

**Tab. S61 MALDI-TOF/TOF-based protein identification for monensin.** Protein names were taken from SubtiWiki database<sup>1</sup>.

| protein | protein name                                                                                   | MW [Da] | pI  | peptides | protein score C.I.% |
|---------|------------------------------------------------------------------------------------------------|---------|-----|----------|---------------------|
| AspS    | aspartyl-tRNA synthetase                                                                       | 65934   | 4.9 | 33       | 100                 |
| CysK    | cysteine synthase                                                                              | 32799   | 5.6 | 16       | 100                 |
| FolD    | methylenetetrahydrofolate dehydrogenase                                                        | 30666   | 5.7 | 17       | 100                 |
| FruC    | fructokinase                                                                                   | 34235   | 4.8 | 16       | 100                 |
| GcvPB   | glycine decarboxylase                                                                          | 54393   | 5.4 | 14       | 100                 |
| GuaB    | IMP dehydrogenase                                                                              | 52958   | 8.1 | 10       | 83                  |
| GudB    | glutamate dehydrogenase; trigger enzyme                                                        | 47182   | 5.7 | 9        | 100                 |
| HemL    | glutamate-1-semialdehyde aminotransferase                                                      | 46420   | 5.2 | 20       | 100                 |
| HisF    | imidazole glycerol phosphate synthase                                                          | 27277   | 5.4 | 14       | 100                 |
| HisZ    | histidyl-tRNA synthetase                                                                       | 43477   | 5.3 | 17       | 100                 |
| IlvD    | dihydroxy-acid dehydratase (2,3-dihydroxy-3-methylbutanoate, 2,3-dihydroxy-3-methylpentanoate) | 59510   | 5.4 | 12       | 100                 |
| KtrC    | low affinity potassium transporter KtrC-KtrD; peripheric membrane component                    | 24333   | 5.7 | 11       | 100                 |
| LuxS    | S-ribosylhomocysteine lyase                                                                    | 17703   | 5.3 | 7        | 100                 |
| MetC    | cystathionine beta-lyase                                                                       | 42465   | 5.8 | 18       | 100                 |
| PatA    | aminotransferase                                                                               | 43421   | 6.0 | 2        | 100                 |
| PdxS    | pyridoxal-5-phosphate synthase                                                                 | 31591   | 5.3 | 15       | 100                 |
| SpoVC   | peptidyl-tRNA hydrolase                                                                        | 20859   | 5.7 | 12       | 100                 |
| TyrS    | tyrosyl-tRNA synthetase                                                                        | 47708   | 5.4 | 18       | 100                 |
| YceC    | unknown                                                                                        | 21810   | 5.5 | 13       | 100                 |
| YceH    | unknown                                                                                        | 41646   | 5.9 | 24       | 100                 |
| YfmS    | soluble chemotaxis receptor                                                                    | 30306   | 4.7 | 14       | 100                 |
| YhcB    | unknown                                                                                        | 19003   | 4.8 | 7        | 100                 |
| YhfK    | unknown                                                                                        | 22746   | 5.3 | 12       | 100                 |
| Yjbl    | unknown                                                                                        | 15106   | 5.3 | 7        | 100                 |
| YkuU    | alkyl hydroperoxide reductase                                                                  | 20434   | 4.7 | 6        | 100                 |
| YqeY    | unknown                                                                                        | 16756   | 5.7 | 14       | 100                 |
| YtiB    | unknown                                                                                        | 21098   | 6.2 | 13       | 100                 |
| YuaE    | bacillithiol S-transferase                                                                     | 19099   | 6.2 | 8        | 100                 |
| Ywfl    | coproheme decarboxylase                                                                        | 29486   | 5.2 | 11       | 100                 |
| YwIF    | ribose-5-phosphate isomerase                                                                   | 16200   | 5.5 | 10       | 100                 |

**Tab. S62 MALDI-TOF/TOF-based protein identification for L-MP66, D-MP66, and L-MP159.** Protein names were taken from SubtiWiki database<sup>1</sup>.

| protein | protein name                                           | MW [Da] | pI  | peptides | protein score C.I.% |
|---------|--------------------------------------------------------|---------|-----|----------|---------------------|
| AzoR2   | azoreductase                                           | 23257   | 5.3 | 7        | 100                 |
| CitZ    | citrate synthase II                                    | 41702   | 5.6 | 16       | 100                 |
| ClpP    | ATP-dependent Clp protease proteolytic subunit         | 21668   | 5.2 | 12       | 100                 |
| DitA    | D-alanyl-D-alanine carrier protein ligase              | 55773   | 5.1 | 13       | 100                 |
| Dps     | mini-ferritin                                          | 16583   | 4.6 | 8        | 100                 |
| TufA    | elongation factor Tu                                   | 44565   | 4.9 | 6        | 100                 |
| GsiB    | general stress protein                                 | 13789   | 5.3 | 5        | 100                 |
| IolS    | unknown                                                | 35146   | 5.5 | 16       | 100                 |
| LiaH    | unknown                                                | 25682   | 6.2 | 13       | 100                 |
| MrgA    | mini-ferritin; DNA-binding stress protein              | 17322   | 4.8 | 3        | 100                 |
| NadE    | NH <sub>3</sub> -dependent NAD <sup>+</sup> synthetase | 30376   | 5.1 | 16       | 100                 |
| PspA    | unknown                                                | 25125   | 5.9 | 11       | 100                 |
| RacX    | amino acid racemase                                    | 25270   | 5.5 | 3        | 100                 |
| SodA    | superoxide dismutase                                   | 22561   | 5.3 | 6        | 100                 |
| SpoVG   | negative effector of asymmetric septation              | 10886   | 5.3 | 10       | 100                 |
| YceC    | unknown                                                | 21810   | 5.5 | 14       | 100                 |
| YceH    | unknown                                                | 41646   | 5.9 | 13       | 100                 |
| YdbD    | unknown                                                | 30238   | 5.1 | 10       | 100                 |
| YhdN    | aldo/keto reductase, specific for NADP                 | 3789    | 5.0 | 10       | 100                 |
| YjdA    | unknown                                                | 27432   | 5.7 | 5        | 99                  |
| YoxD    | unknown                                                | 25283   | 5.5 | 20       | 100                 |
| YqiW    | bacilliredoxin                                         | 16186   | 5.0 | 7        | 100                 |
| YqkF    | NADPH-dependent 4-Hydroxy-2,3-trans-nonenal reductase  | 34695   | 5.3 | 10       | 100                 |
| YthP    | ABC transporter (ATP-binding protein)                  | 26490   | 5.4 | 5        | 100                 |
| YtkL    | unknown                                                | 24816   | 5.1 | 8        | 100                 |
| YuaI    | unknown                                                | 19830   | 5.3 | 7        | 100                 |
| YvIB    | unknown                                                | 41056   | 5.5 | 15       | 100                 |
| YwrO    | unknown                                                | 19942   | 5.3 | 7        | 100                 |

**Tab. S63 nUPLC-ESI-MS-based protein identification for mupirocin.** Protein names were taken from SubtiWiki database<sup>1</sup>.

| protein | protein name                                                                | MW [Da] | pI  | PLGS score | peptides | coverage [%] |
|---------|-----------------------------------------------------------------------------|---------|-----|------------|----------|--------------|
| IlvC    | ketol-acid reductoisomerase (2,3-dihydroxy-3-methylbutanoate,2-acteoactate) | 37434   | 5.4 | 19820      | 100      | 85           |
| OhrB    | general stress protein                                                      | 14591   | 4.7 | 1198       | 18       | 79           |
| PycA    | pyruvate carboxylase                                                        | 127856  | 5.4 | 4037       | 158      | 71           |
| Tpx     | unknown                                                                     | 18204   | 4.7 | 16285      | 33       | 85           |
| YdaG    | general stress protein                                                      | 15867   | 5.2 | 4615       | 18       | 81           |
| YtxH    | general stress protein                                                      | 16544   | 5.1 | 5773       | 30       | 65           |

**Tab. S64 nUPLC-ESI-MS-based protein identification for nalidixic acid.** Protein names were taken from SubtiWiki database<sup>1</sup>. Superscripts indicate that the protein was identified in multiple spots on the gel image (see Fig. S27).

| protein           | protein name                                                 | MW [Da] | pI  | PLGS score | peptides | coverage [%] |
|-------------------|--------------------------------------------------------------|---------|-----|------------|----------|--------------|
| Abh               | transition state regulator                                   | 10249   | 5.8 | 40401      | 10       | 51           |
| AckA              | acetate kinase                                               | 43110   | 5.2 | 7460       | 51       | 73           |
| AdcA              | zinc-binding lipoprotein                                     | 35637   | 5.2 | 9968       | 55       | 45           |
| AhpF <sup>1</sup> | NADH dehydrogenase                                           | 54839   | 4.7 | 13589      | 151      | 79           |
| AhpF <sup>2</sup> |                                                              |         |     | 1520       | 30       | 64           |
| Apt               | adenine phosphoribosyltransferase                            | 18863   | 4.7 | 5576       | 14       | 45           |
| CarB              | carbamoyl-phosphate synthase pyrimidine-specific large chain | 117576  | 4.8 | 429        | 26       | 27           |
| FabF              | 3-oxoacyl-[acyl-carrier-protein] synthase                    | 43977   | 4.8 | 5099       | 35       | 77           |
| Fur               | ferric uptake regulation                                     | 17416   | 5.3 | 2888       | 12       | 37           |
| HslO              | chaperonin                                                   | 31791   | 4.7 | 5586       | 52       | 47           |
| KatA              | vegetative catalase                                          | 54757   | 6.1 | 6034       | 63       | 64           |
| LysC              | aspartokinase                                                | 43780   | 4.6 | 1140       | 23       | 19           |
| Mbl               | MreB-like protein                                            | 35838   | 5.7 | 2307       | 23       | 50           |
| PyrK              | dihydroorotate dehydrogenase B                               | 28081   | 5.6 | 2207       | 23       | 57           |
| QueC              | 7-cyano-7-deazaguanine synthase                              | 24513   | 5.2 | 4765       | 25       | 58           |
| SpeA              | arginine decarboxylase                                       | 53549   | 5.1 | 591        | 15       | 25           |
| SufB <sup>1</sup> | FeS cluster assembly protein                                 | 52696   | 5.0 | 1260       | 31       | 41           |
| SufB <sup>2</sup> |                                                              |         |     | 1339       | 33       | 46           |
| SufC              | ABC transporter ATP-binding protein                          | 29012   | 4.6 | 7620       | 60       | 79           |
| TenA              | thiaminase                                                   | 27399   | 5.0 | 5632       | 36       | 72           |
| TufA <sup>1</sup> | elongation factor Tu                                         | 43565   | 4.7 | 26544      | 239      | 88           |
| TufA <sup>2</sup> |                                                              |         |     | 4083       | 39       | 52           |
| YfmT              | aldehyde dehydrogenase                                       | 53287   | 5.1 | 393        | 7        | 14           |
| YhbJ              | efflux system component                                      | 23607   | 4.4 | 2389       | 20       | 29           |
| YhcB              | hypothetical protein                                         | 19003   | 4.6 | 5906       | 20       | 42           |
| YkvM              | 7-cyano-7-deazaguanine reductase                             | 19362   | 4.9 | 2539       | 13       | 48           |
| YIbN              | hypothetical protein                                         | 19987   | 4.3 | 3585       | 11       | 55           |
| YqfS              | endonuclease IV                                              | 33047   | 5.4 | 2697       | 17       | 52           |
| Yual              | N-acetyltransferase                                          | 19830   | 5.2 | 1957       | 3        | 17           |

**Tab. S65 nUPLC-ESI-MS-based protein identification for nocathiacin I.** Protein names were taken from SubtiWiki database<sup>1</sup>. Superscripts indicate that the protein was identified in multiple spots on the gel image (see Fig. S28).

| <b>protein</b>    | <b>protein name</b>                      | <b>MW<br/>[Da]</b> | <b>pI</b> | <b>PLGS<br/>score</b> | <b>peptides</b> | <b>coverage<br/>[%]</b> |
|-------------------|------------------------------------------|--------------------|-----------|-----------------------|-----------------|-------------------------|
| FusA              | elongation factor G                      | 76568              | 4.6       | 4624                  | 101             | 45                      |
| GapA              | glyceraldehyde 3-phosphate dehydrogenase | 35810              | 5.0       | 10501                 | 33              | 81                      |
| Hag               | flagellin protein                        | 32606              | 4.8       | 49890                 | 114             | 88                      |
| PurQ              | phosphoribosylformylglycinamide synthase | 24768              | 4.6       | 1863                  | 5               | 17                      |
| RplD              | ribosomal protein L4                     | 22377              | 10.5      | 19258                 | 52              | 71                      |
| RplJ              | ribosomal protein L10                    | 12742              | 4.4       | 28422                 | 12              | 84                      |
| RplL              | ribosomal protein L12                    | 12742              | 4.4       | 89820                 | 110             | 93                      |
| RplR              | ribosomal protein L18                    | 12960              | 10.5      | 1342                  | 5               | 33                      |
| RpsB <sup>1</sup> |                                          |                    |           | 10424                 | 52              | 56                      |
| RpsB <sup>2</sup> | ribosomal protein S2                     | 27949              | 6.3       | 735                   | 9               | 30                      |
| RpsB <sup>3</sup> |                                          |                    |           | 13434                 | 73              | 81                      |
| RpsB <sup>4</sup> |                                          |                    |           | 36171                 | 127             | 89                      |
| RpsF <sup>1</sup> |                                          |                    |           | 9751                  | 31              | 87                      |
| RpsF <sup>2</sup> | ribosomal protein S6                     | 11117              | 5.0       | 4618                  | 8               | 42                      |
| SufB              | Fe-S carrier protein                     | 52696              | 5.0       | 2721                  | 38              | 48                      |
| TufA <sup>1</sup> | elongation factor Tu                     | 43565              | 4.7       | 36386                 | 154             | 82                      |
| TufA <sup>2</sup> |                                          |                    |           | 17777                 | 91              | 68                      |
| YkrA              | unknown                                  | 28886              | 4.6       | 4206                  | 21              | 39                      |
| YugL              | glucose-6-phosphate isomerase            | 14274              | 5.9       | 29701                 | 42              | 79                      |



**Tab. S66 MALDI-TOF/TOF-based protein identification for NV503.** Protein names were taken from SubtiWiki database<sup>1</sup>.

| protein | protein name                                          | MW [Da] | pI  | peptides | protein score C.I.% |
|---------|-------------------------------------------------------|---------|-----|----------|---------------------|
| BglH    | phospho-beta-glucosidase                              | 48644   | 5.1 | 19       | 100                 |
| Ctc     | ribosomal protein                                     | 22042   | 4.4 | 8        | 100                 |
| FabZ    | $\beta$ -hydroxyacyl-ACP dehydratase                  | 14759   | 9.1 | 10       | 100                 |
| Hom     | homoserine dehydrogenase (NADPH)                      | 47465   | 5.1 | 17       | 100                 |
| HslO    | putative disulfide bon chaperone                      | 31791   | 4.9 | 14       | 100                 |
| IspF    | 2-C-methyl-D-erythrol-2,4-cyclodiphosphate synthase   | 17115   | 5.5 | 13       | 100                 |
| LiaH    | unknown                                               | 31591   | 5.3 | 11       | 100                 |
| MsrB    | peptide methionine sulfoxide reductase                | 16591   | 5.9 | 7        | 100                 |
| NadF    | inorganic polyphosphate/ATP-NAD kinase                | 29993   | 6.0 | 15       | 100                 |
| NusA    | transcription termination factor                      | 41700   | 4.8 | 18       | 100                 |
| OdhB    | 2-oxoglutarate dehydrogenase complex                  | 45960   | 5.1 | 9        | 100                 |
| PdxS    | pyridoxal-5-phosphate synthase (synthase domain)      | 31591   | 5.3 | 15       | 100                 |
| PrmA    | unknown                                               | 34573   | 4.8 | 7        | 100                 |
| PspA    | phage shock protein A homolog                         | 25125   | 5.9 | 2        | 100                 |
| RibH    | riboflavin synthase (beta subunit)                    | 16276   | 5.4 | 8        | 100                 |
| RimM    | 16S rRNA processing RNase                             | 20190   | 5.4 | 8        | 100                 |
| SdhA    | succinate dehydrogenase                               | 65308   | 5.8 | 20       | 100                 |
| SkfG    | unknown                                               | 14468   | 5.3 | 4        | 100                 |
| ThrS    | threonmyl-tRNA synthetase (major)                     | 73468   | 5.4 | 9        | 100                 |
| TrmK    | tRNA:m1A22 methyl transferase                         | 23690   | 5.4 | 4        | 100                 |
| TrxB    | thioredoxin reductase (NADPH)                         | 34498   | 5.2 | 19       | 100                 |
| YceC    | unknown                                               | 20754   | 5.5 | 1        | 100                 |
| YfjR    | 3-hydroxyisobutyrate dehydrogenase                    | 27848   | 5.0 | 5        | 100                 |
| YfmS    | soluble chemotaxis receptor                           | 30306   | 4.7 | 14       | 100                 |
| YhfE    | unknown                                               | 38712   | 5.9 | 12       | 100                 |
| YphP    | bacilliredoxin                                        | 15865   | 4.8 | 9        | 100                 |
| YqeK    | unknown                                               | 21269   | 6.0 | 15       | 100                 |
| YqkB    | unknown                                               | 11757   | 5.0 | 8        | 100                 |
| YqkF    | NADPH-dependent 4-Hydroxy-2,3-trans-nonenal reductase | 34696   | 5.3 | 13       | 100                 |
| YsnF    | unknown                                               | 32258   | 4.4 | 9        | 100                 |
| YugI    | unknown                                               | 14274   | 6.0 | 9        | 100                 |
| YvIB    | unknown                                               | 37434   | 5.5 | 17       | 100                 |
| YxaB    | putative exopolysaccharide synthase                   | 39738   | 4.7 | 14       | 100                 |

**Tab. S67 nUPLC-ESI-MS-based protein identification for salvorsan.** Protein names were taken from SubtiWiki database<sup>1</sup>.

| protein | protein name                                     | MW [Da] | pI   | PLGS score | peptides | coverage [%] |
|---------|--------------------------------------------------|---------|------|------------|----------|--------------|
| GroEL   | chaperonin; co-repressor for HrcA                | 57425   | 4.5  | 2942       | 24       | 41           |
| PtsI    | phosphotransferase system (PTS) enzyme I         | 63193   | 4.6  | 6078       | 42       | 64           |
| PepF    | oligoendopeptidase                               | 77187   | 5.6  | 1843       | 31       | 38           |
| AmpS    | aminopeptidase                                   | 45798   | 5.0  | 424        | 8        | 16           |
| YxeK    | <i>N</i> -acetyl S-(2-succino)cysteine oxygenase | 49369   | 5.7  | 1941       | 13       | 26           |
| NusA    | transcription termination factor                 | 41782   | 4.6  | 767        | 11       | 26           |
| MccB    | cystathionine lyase/homocysteine gamma-lyase     | 44886   | 5.2  | 647        | 8        | 21           |
| SalA    | MRP family regulator                             | 38639   | 5.2  | 728        | 8        | 38           |
| HemH    | coproporphyrin ferrochelatase                    | 35405   | 4.6  | 612        | 4        | 11           |
| IolS    | unknown                                          | 35168   | 5.4  | 798        | 10       | 30           |
| Cah     | cephalosporin C deacetylase                      | 35807   | 5.4  | 3748       | 19       | 59           |
| CysK    | cysteine synthase                                | 32820   | 5.5  | 9650       | 28       | 69           |
| YwfI    | GcvH:E2 amidotransferase                         | 28959   | 5.1  | 1685       | 7        | 29           |
| YvrD    | unknown                                          | 28222   | 4.7  | 5953       | 14       | 43           |
| YmaB    | unknown                                          | 23388   | 4.5  | 1174       | 10       | 44           |
| Cmk     | cytidylate kinase (CMP, dCMP)                    | 25097   | 5.0  | 4410       | 11       | 46           |
| YvyD    | ribosome hibernation promoting factor            | 21980   | 5.2  | 2539       | 6        | 49           |
| PyrF    | orotidine-5-phosphate decarboxylase              | 26106   | 5.8  | 1011       | 13       | 67           |
| YfkO    | NAD(P)H-flavin nitroreductase                    | 26585   | 5.7  | 2531       | 15       | 49           |
| CysC    | adenylyl-sulfate kinase                          | 22715   | 5.1  | 6362       | 14       | 71           |
| YocJ    | azoreductase                                     | 22977   | 5.0  | 1999       | 15       | 40           |
| SodA    | superoxide dismutase                             | 22490   | 5.1  | 1712       | 11       | 63           |
| YuaE    | bacillithiol S-transferase                       | 19111   | 6.2  | 592        | 4        | 25           |
| GreA    | transcription elongation factor                  | 17272   | 4.5  | 3242       | 8        | 59           |
| YlaL    | unknown                                          | 17952   | 5.2  | 1829       | 11       | 73           |
| RplR    | ribosomal protein L18                            | 12969   | 10.5 | 592        | 3        | 24           |
| ArsC    | arsenate reductase                               | 15824   | 4.8  | 4440       | 11       | 57           |
| SpoVG   | negative effector of asymmetric septation        | 10893   | 5.1  | 2356       | 8        | 58           |
| RplL    | ribosomal protein L12 (BL9)                      | 12751   | 4.4  | 24735      | 12       | 58           |
| GroES   | chaperonin                                       | 10176   | 4.6  | 21127      | 13       | 93           |
| AbrB    | transcriptional regulator                        | 10830   | 6.8  | 374        | 3        | 27           |

**Tab. S68 MALDI-TOF/TOF-based protein identification for squalamine.** Protein names were taken from SubtiWiki database<sup>1</sup>.

| protein | protein Name                                         | MW [Da] | pI   | peptides | protein score C.I.% |
|---------|------------------------------------------------------|---------|------|----------|---------------------|
| LiaH    | unknown                                              | 31591   | 5.26 | 11       | 100                 |
| PrmA    | unknown                                              | 34573   | 4.79 | 7        | 100                 |
| SdhA    | succinate dehydrogenase (/flavoprotein subunit)      | 65308   | 5.77 | 20       | 100                 |
| YqkF    | NADP-dependent 4-Hydroxy-2,3-trans-nonenal reductase | 34696   | 5.30 | 13       | 100                 |
| YxaB    | putative exopolysaccharide synthase                  | 39738   | 4.72 | 14       | 100                 |

**Tab. S69 nUPLC-ESI-MS-based protein identification for telithromycin.** Protein names were taken from SubtiWiki database<sup>1</sup>. Superscripts indicate that the protein was identified in multiple spots on the gel image (see Fig. S32).

| protein           | protein name                                                                           | MW [Da] | pI  | PLGS score | peptides | coverage [%] |
|-------------------|----------------------------------------------------------------------------------------|---------|-----|------------|----------|--------------|
| AdcA              | zinc transport system zinc-binding lipoprotein                                         | 35637   | 5.2 | 16660      | 45       | 78           |
| Adk               | adenylate kinase                                                                       | 24104   | 4.5 | 6039       | 27       | 69           |
| DivIVA            | septum site-determining protein                                                        | 19329   | 4.9 | 9565       | 25       | 68           |
| DnaK              | chaperone protein                                                                      | 65962   | 4.6 | 4353       | 46       | 53           |
| Eno               | enolase                                                                                | 46552   | 4.5 | 4481       | 33       | 64           |
| Gid               | methylenetetrahydrofolate--tRNA-(uracil-5-)-methyltransferase                          | 48032   | 5.8 | 1774       | 25       | 76           |
| IolS              | aldo/keto reductase family protein                                                     | 35146   | 5.4 | 4916       | 31       | 69           |
| MetE <sup>1</sup> | 5-methyltetrahydropteroyltrimethylglutamate-homocysteine methyltransferase             | 86752   | 4.9 | 1036       | 23       | 35           |
| MetE <sup>2</sup> |                                                                                        |         |     | 5632       | 66       | 68           |
| MetE <sup>3</sup> |                                                                                        |         |     | 9199       | 98       | 67           |
| PdhD              | dihydrolipoyl dehydrogenase                                                            | 49701   | 4.8 | 5631       | 40       | 67           |
| Pgk               | phosphoglycerate kinase                                                                | 42163   | 4.8 | 4646       | 26       | 54           |
| PupG              | purine nucleoside phosphorylase                                                        | 29108   | 4.9 | 1891       | 26       | 78           |
| PyrAA             | carbamoyl-phosphate synthase pyrimidine-specific small chain                           | 40093   | 5.8 | 5049       | 34       | 45           |
| RplJ              | 50S ribosomal protein L10                                                              | 18067   | 5.2 | 23050      | 53       | 92           |
| SufD              | FeS cluster assembly protein                                                           | 48263   | 5.0 | 17771      | 57       | 82           |
| TpiA              | triosephosphate isomerase                                                              | 27012   | 4.8 | 13240      | 27       | 90           |
| TufA <sup>1</sup> | elongation factor Tu                                                                   | 43565   | 4.7 | 24283      | 85       | 91           |
| TufA <sup>2</sup> |                                                                                        |         |     | 3607       | 38       | 58           |
| YceE              | hypothetical protein                                                                   | 20935   | 4.4 | 6790       | 7        | 46           |
| YhdK              | anti-sigma-M factor                                                                    | 10634   | 8.7 | 659        | 5        | 93           |
| YitJ              | bifunctional homocysteine S-methyltransferase/5,10-methylenetetrahydrofolate reductase | 67885   | 5.3 | 1972       | 40       | 79           |
| YqfS              | endonuclease IV                                                                        | 33047   | 5.4 | 1272       | 8        | 35           |
| YrpE              | zinc-binding protein                                                                   | 28851   | 5.1 | 254        | 17       | 64           |

**Tab. S70 nUPLC-ESI-MS-based protein identification for tunicamycin.** Protein names were taken from SubtiWiki database<sup>1</sup>. Superscripts indicate that the protein was identified in multiple spots on the gel image (see Fig. S33).

| protein           | protein name                            | MW [Da] | pI  | PLGS score | peptides | coverage [%] |
|-------------------|-----------------------------------------|---------|-----|------------|----------|--------------|
| AhpC              | alkyl hydroperoxide reductase subunit C | 20614   | 4.3 | 29880      | 72       | 100          |
| AhpF <sup>1</sup> | NADH dehydrogenase                      | 54389   | 4.7 | 4262       | 47       | 66           |
| AhpF <sup>2</sup> |                                         |         |     | 7282       | 90       | 75           |
| CysC              | adenylyl-sulfate kinase                 | 22530   | 5.1 | 14681      | 41       | 65           |
| DhbB              | isochorismatase                         | 35084   | 4.4 | 3730       | 38       | 80           |
| GuaB              | inosine-5'-monophosphate dehydrogenase  | 52957   | 6.2 | 1711       | 25       | 48           |
| Hag               | flagellin                               | 32606   | 4.8 | 9198       | 23       | 51           |
| MntA              | manganese-binding lipoprotein           | 33397   | 6.2 | 1993       | 16       | 42           |
| NagBB             | glucosamine-6-phosphate deaminase 2     | 27271   | 5.8 | 3458       | 23       | 49           |
| PspA              | phage shock protein A homolog           | 25125   | 5.8 | 1309       | 15       | 55           |
| RacX              | amino acid racemase                     | 25269   | 5.4 | 6137       | 20       | 49           |
| TasA              | spore coat protein N                    | 28287   | 5.4 | 2285       | 22       | 56           |
| YceC              | stress response protein SCP2            | 21809   | 5.3 | 7867       | 39       | 81           |
| YdbD              | manganese catalase                      | 30238   | 4.9 | 3787       | 12       | 42           |
| YgxA              | hypothetical protein                    | 34374   | 5.8 | 1957       | 28       | 67           |
| YqiG              | NADH-dependent flavin oxidoreductase    | 40779   | 5.2 | 5018       | 44       | 64           |
| YrhB              | cystathionine gamma-lyase               | 40860   | 5.2 | 2578       | 26       | 86           |
| YugK              | NADH-dependent butanol dehydrogenase 2  | 43378   | 4.6 | 2970       | 39       | 61           |
| YviB              | hypothetical protein                    | 41055   | 5.4 | 5191       | 27       | 52           |

**Tab. S71 nUPLC-ESI-MS-based protein identification for UC41.** Protein names were taken from SubtiWiki database<sup>1</sup>.

| protein | protein name                                            | MW [Da] | pI  | PLGS score | peptides | coverage [%] |
|---------|---------------------------------------------------------|---------|-----|------------|----------|--------------|
| ClpC    | AAA unflodase, ATPase subunit of the ClpC-CplP protease | 90063   | 5.7 | 11593      | 162      | 78           |
| FosB    | fosfomycin resistance protein                           | 17161   | 6.1 | 2240       | 18       | 77           |
| HisS    | histidyl-tRNA synthetase                                | 48101   | 5.2 | 24996      | 121      | 89           |
| NfrA    | FMN-containing NADPH-linked nitro/flavin reductase      | 28302   | 5.7 | 20181      | 34       | 63           |
| PbpE    | penicillin-binding Protein PBP4* (spore cortex)         | 51404   | 4.8 | 16515      | 92       | 87           |
| PdhB    | pyruvate dehydrogenase (E1 beta subunit)                | 35452   | 4.5 | 2457       | 22       | 45           |
| PspA    | phage shock protein A homolog                           | 25125   | 5.8 | 13563      | 91       | 86           |
| RacX    | amino acid racemase                                     | 25269   | 5.4 | 12339      | 37       | 31           |
| RplL    | ribosomale protein L12                                  | 12742   | 4.3 | 144653     | 114      | 94           |
| SalA    | MRP family regulator                                    | 38614   | 5.2 | 10282      | 52       | 56           |
| SodA    | superoxide dismutase                                    | 22476   | 5.1 | 19007      | 23       | 84           |
| YceH    | unknown                                                 | 41646   | 5.7 | 15255      | 157      | 85           |
| YdgG    | unknown                                                 | 17263   | 5.6 | 10876      | 15       | 74           |
| YdjP    | unknown                                                 | 30489   | 4.6 | 11487      | 33       | 56           |
| YfhM    | unknown                                                 | 32737   | 6.1 | 23449      | 64       | 78           |
| YhfK    | unknown                                                 | 22745   | 5.2 | 51576      | 75       | 92           |
| YjbC    | general stress protein                                  | 23105   | 5.1 | 13172      | 51       | 73           |
| YjbL    | unknown                                                 | 15106   | 5.2 | 2710       | 17       | 95           |
| YlbA    | unknown                                                 | 13484   | 5.0 | 17399      | 26       | 84           |
| YojG    | N-acetylglucosamin-malate deacetylase                   | 25560   | 4.7 | 1045       | 13       | 30           |
| YpqE    | unknown                                                 | 17924   | 5.3 | 1156       | 12       | 67           |
| YuaG    | membrane-associated scaffold protein                    | 55959   | 5.1 | 34541      | 179      | 83           |
| YuaI    | unknown                                                 | 19830   | 5.2 | 17957      | 23       | 91           |
| YukJ    | unknown                                                 | 25538   | 4.4 | 6418       | 31       | 98           |
| YvbH    | unknown                                                 | 23787   | 4.9 | 6136       | 18       | 59           |
| YvIB    | unknown                                                 | 41055   | 5.4 | 11859      | 52       | 84           |
| YwrO    | unknown                                                 | 19942   | 5.2 | 16233      | 24       | 62           |
| YycD    | unknown                                                 | 7456    | 4.8 | 3430       | 4        | 76           |

## Supplementary figures

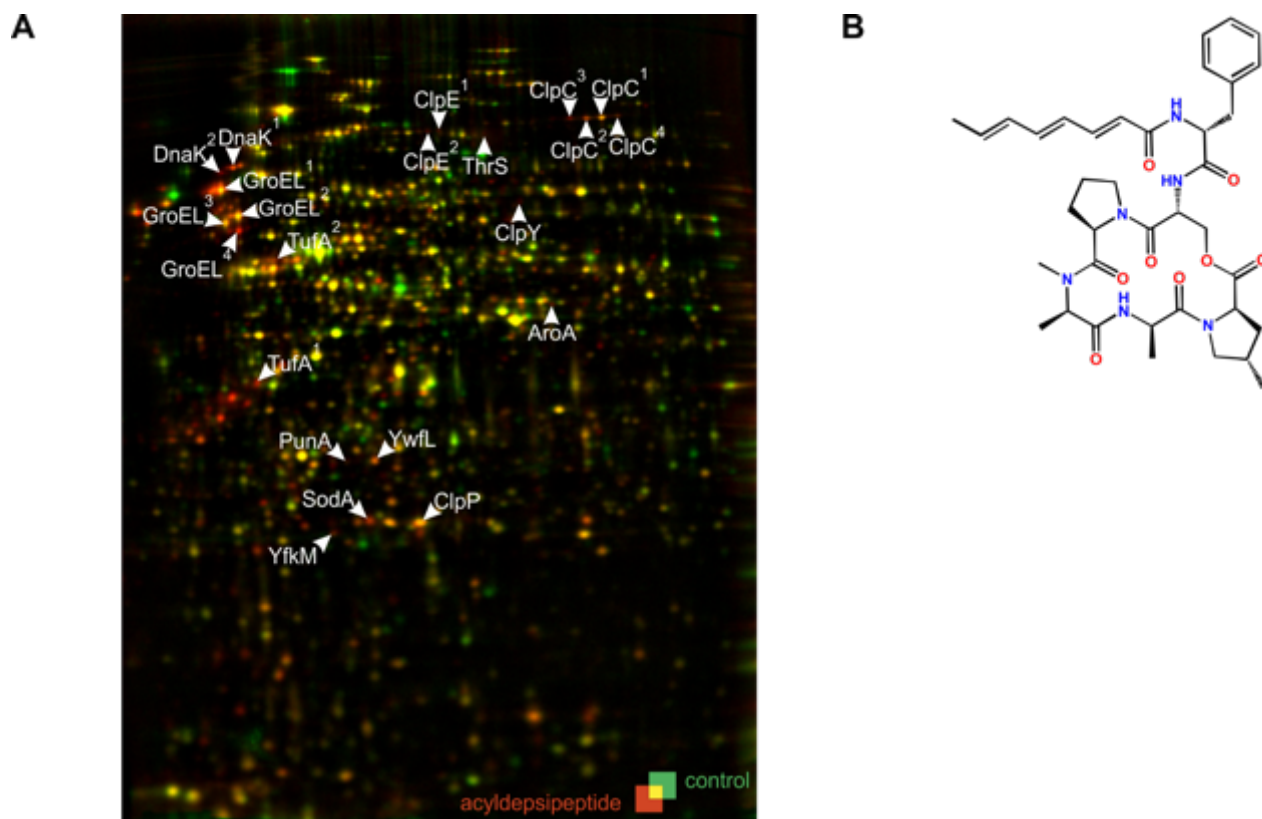

**Fig. S1 Proteomic response of *B. subtilis* towards acyldepsipeptide.** (A) Identified marker proteins based on 2D-PAGE analysis of cytosolic proteins of *B. subtilis* treated with 1  $\mu\text{g/ml}$  of acyldepsipeptide (B). Superscripts indicate when a protein was identified in multiple spots. Synthesis of cytosolic proteins of untreated (green) and antibiotic-treated (red) *B. subtilis* were compared based on incorporation of radioactive [ $^{35}\text{S}$ ]-methionine. Data taken from Brötz-Oesterhelt *et al.*, 2005<sup>4</sup>. Proteins were identified based on comparison with Eymann *et al.*, 2004<sup>5</sup>. Acyldepsipeptide binds ClpP and enables uncontrolled proteolysis in the absence of a regulatory Clp-ATPase subunit<sup>4</sup>. All sections show representative data.

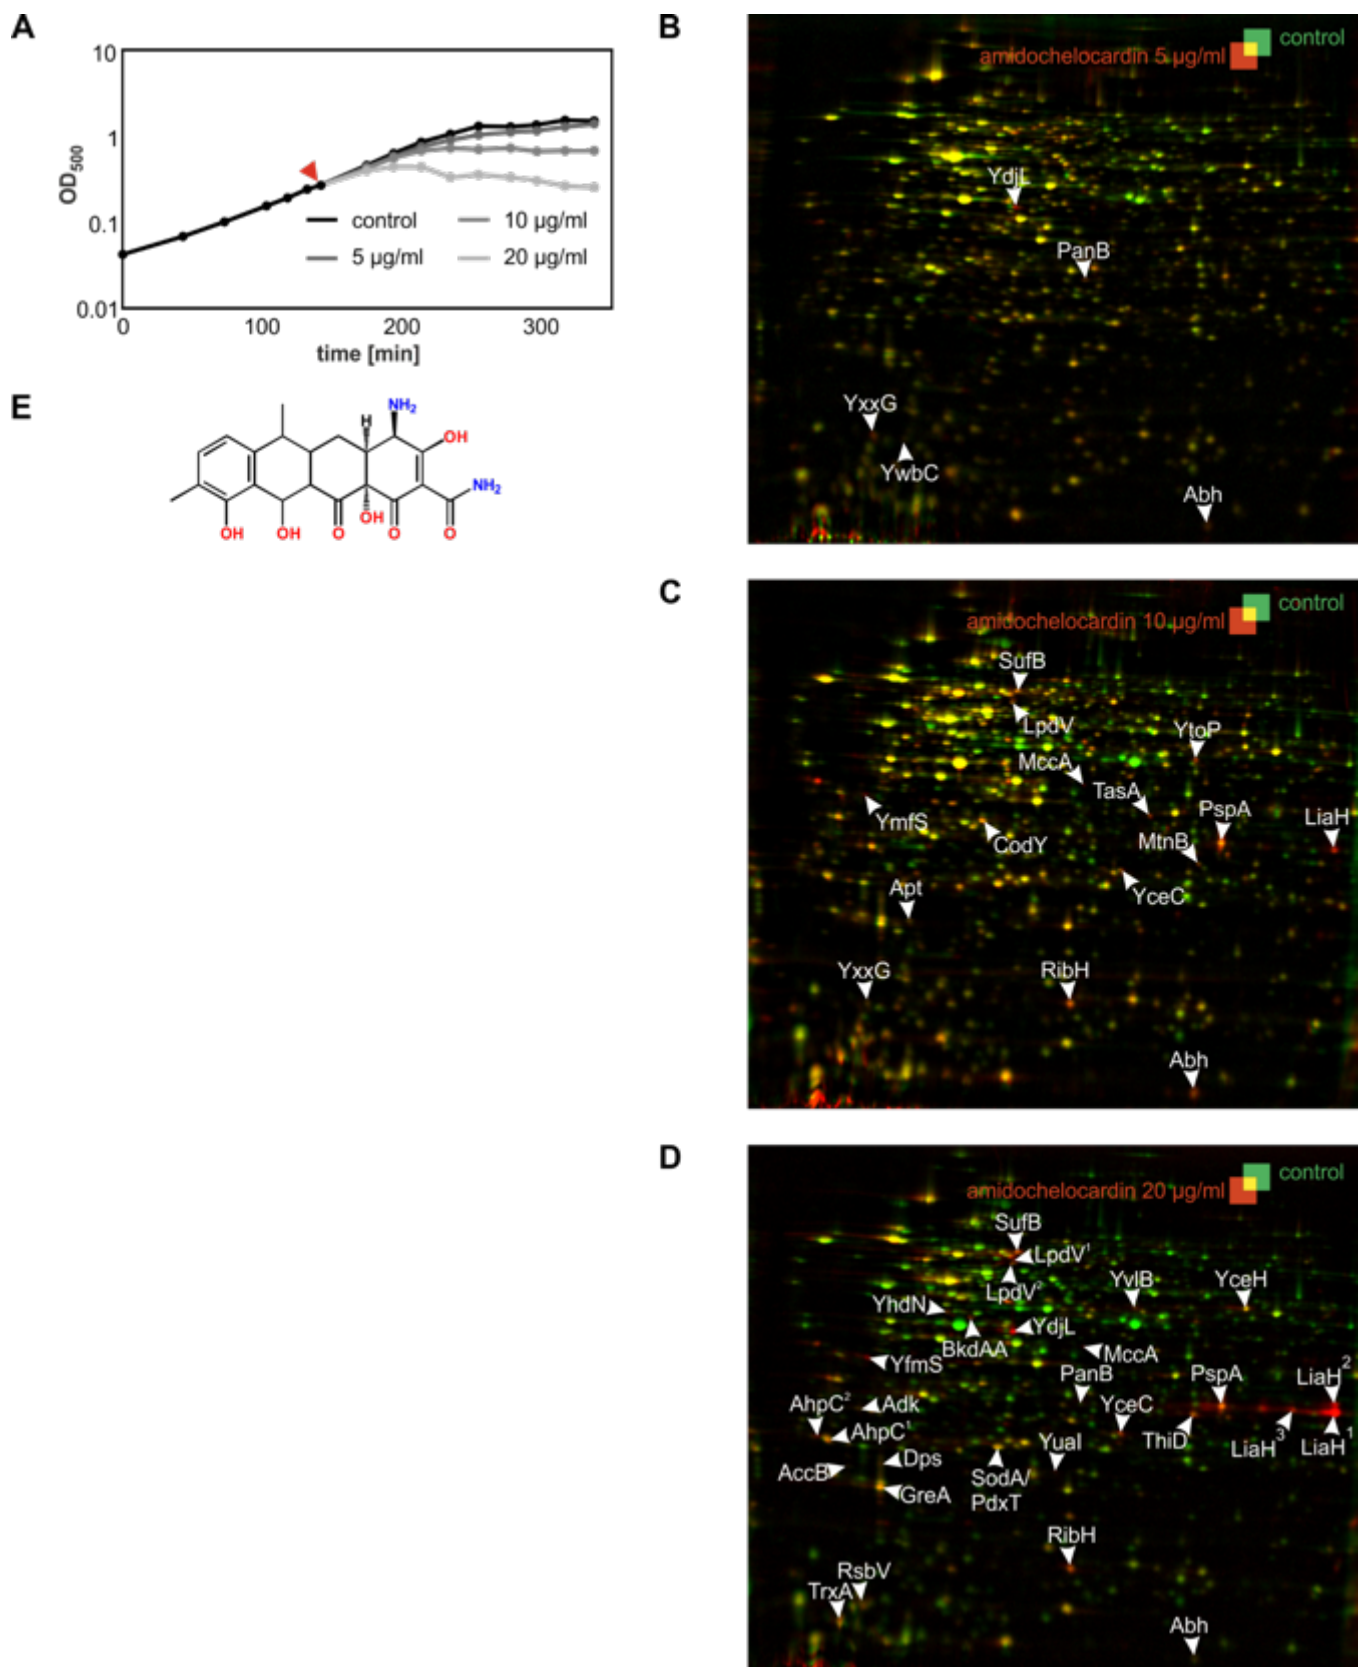

**Fig. S2 Proteomic response of *B. subtilis* towards amidochelocardin.** (A) growth curves of *B. subtilis*, comparing an untreated control with cultures treated with 2-carboxamido-2-deacetyl-chelocardin (amidochelocardin). Identified marker proteins based on 2D-PAGE analysis of cytosolic proteins of *B. subtilis* treated with 5 µg/ml (B), 10 µg/ml (C), and 20 µg/ml (D) of amidochelocardin (E). Superscripts indicate when a protein was identified in multiple spots. Synthesis of cytosolic proteins of untreated (green) and antibiotic-treated (red) *B. subtilis* were compared based on incorporation of radioactive [<sup>35</sup>S]-methionine. By applying CoPR approach, we have gained strong indication that the atypical tetracycline amidochelocardin concentration-dependently targets protein synthesis and/or the cytoplasmic membrane. All sections show representative data.

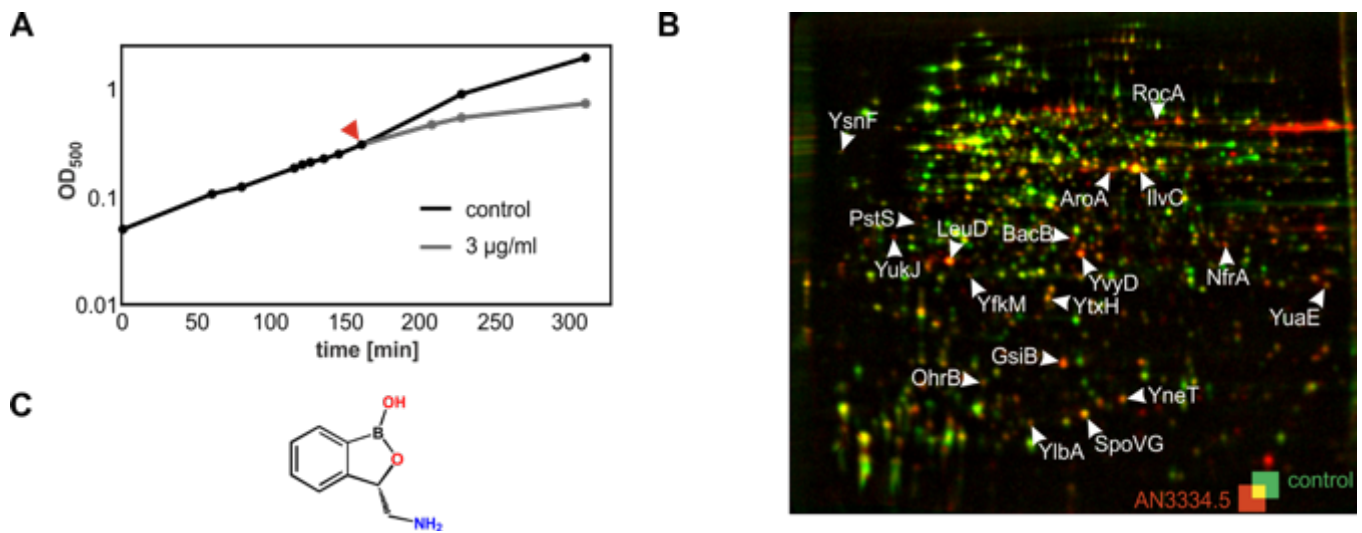

**Fig. S3 Proteomic response of *B. subtilis* towards AN3334.** (A) growth curves of *B. subtilis*, comparing an untreated control with a culture treated with AN3334. Identified marker proteins based on 2D-PAGE analysis of cytosolic proteins of *B. subtilis* treated with 3 µg/ml (B) of AN3334 (C). Synthesis of cytosolic proteins of untreated (green) and antibiotic-treated (red) *B. subtilis* were compared based on incorporation of radioactive [<sup>35</sup>S]-methionine. AN3334 inhibits the bacterial leucyl-tRNA synthetase<sup>6</sup>. All sections show representative data.



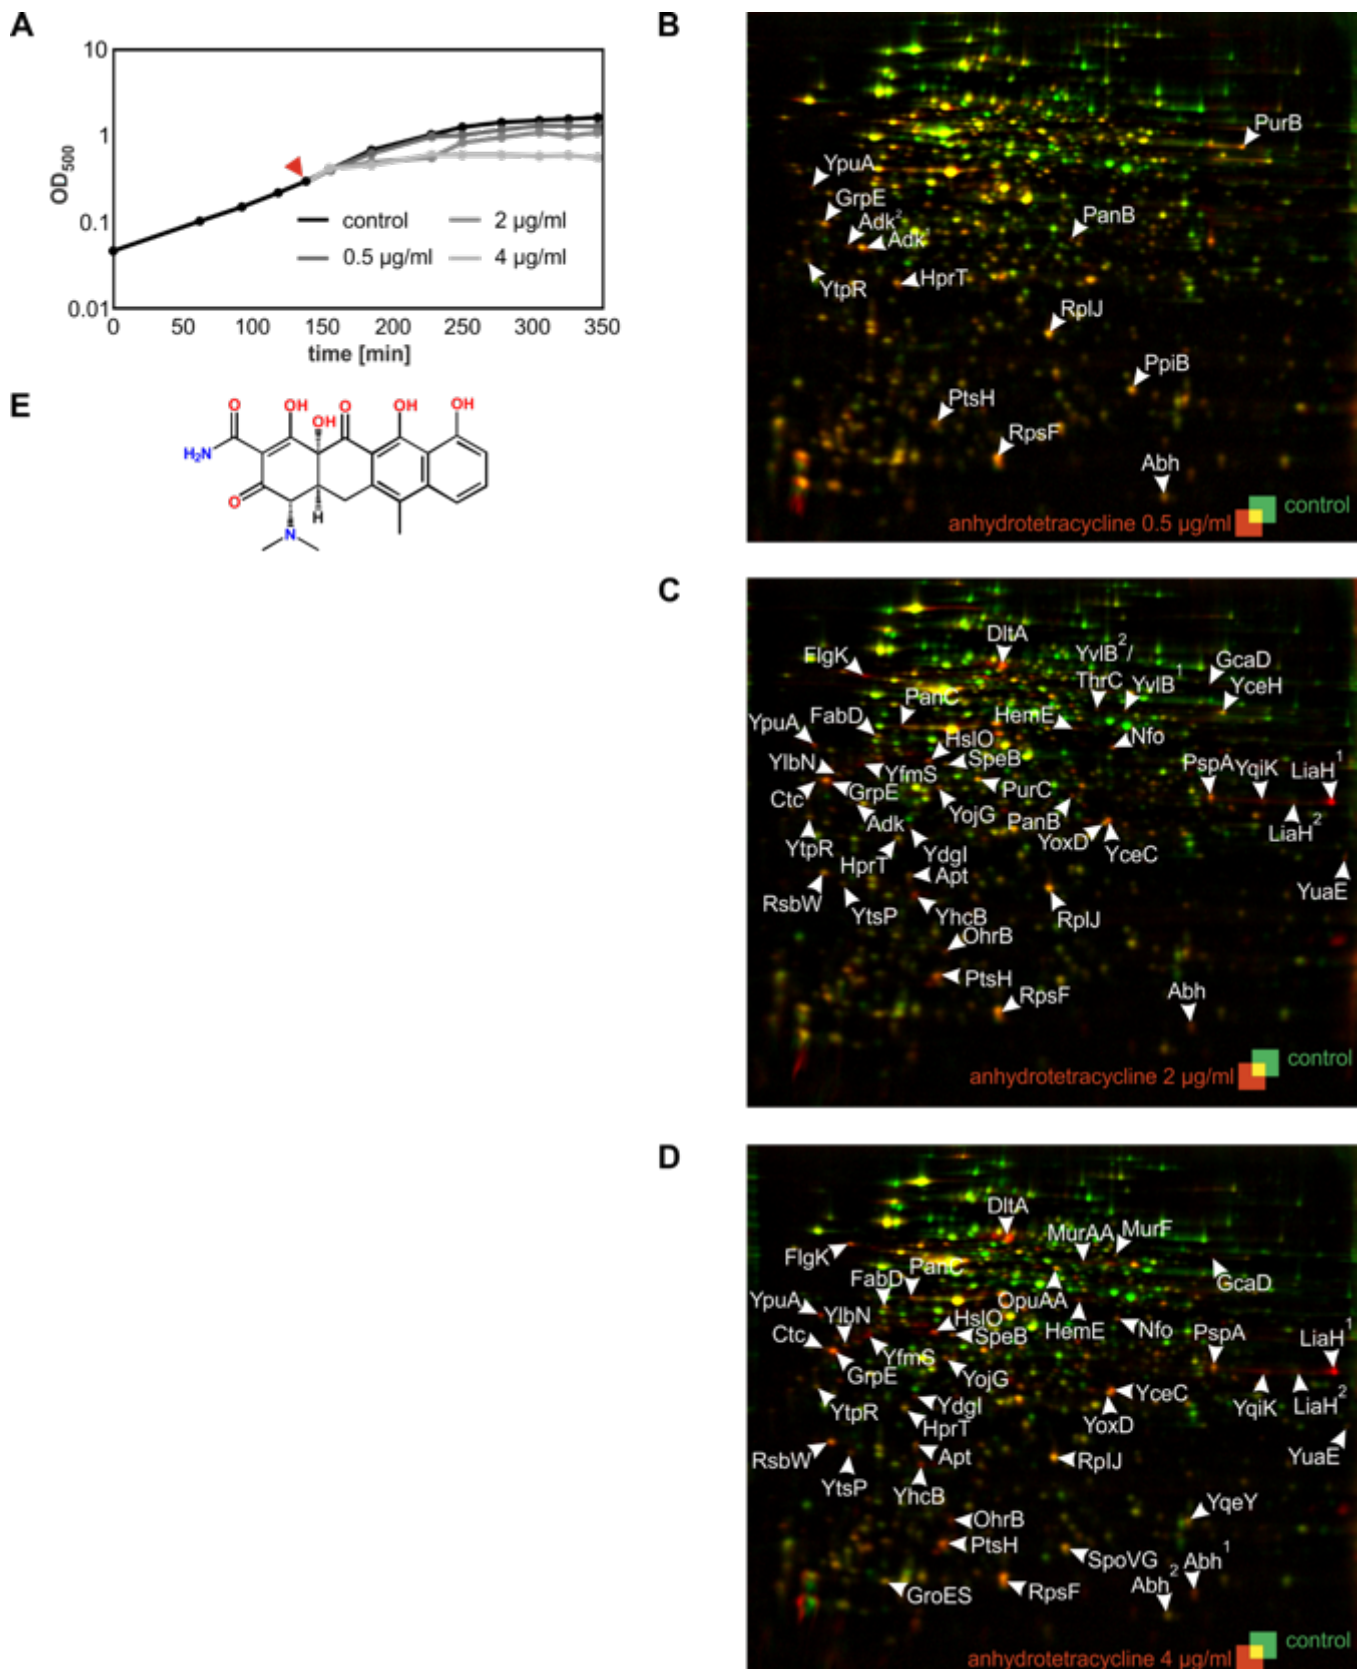

**Fig. S4 Proteomic response of *B. subtilis* towards anhydrotetracycline.** (A) growth curves of *B. subtilis*, comparing an untreated control with cultures treated with anhydrotetracycline. Identified marker proteins based on 2D-PAGE analysis of cytosolic proteins of *B. subtilis* treated with 0.5 µg/ml (B), 2 µg/ml (C), and 4 µg/ml (D) of anhydrotetracycline (E). Superscripts indicate when a protein was identified in multiple spots. Synthesis of cytosolic proteins of untreated (green) and antibiotic-treated (red) *B. subtilis* were compared based on incorporation of radioactive [<sup>35</sup>S]-methionine. Anhydrotetracycline concentration-dependently targets protein synthesis and/or the cytoplasmic membrane<sup>7</sup>. All sections show representative data.



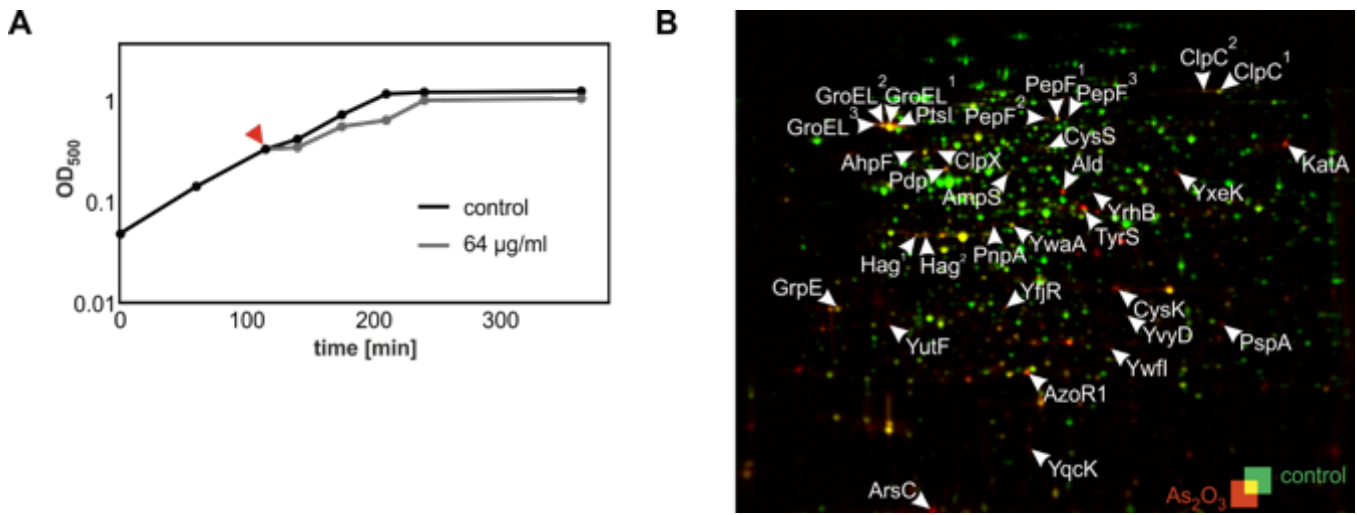

**Fig. S5 Proteomic response of *B. subtilis* towards  $As_2O_3$ .** (A) growth curves of *B. subtilis*, comparing an untreated control with a culture treated with  $As_2O_3$ . Identified marker proteins based on 2D-PAGE analysis of cytosolic proteins of *B. subtilis* treated with 64  $\mu g/ml$  (B) of  $As_2O_3$ . Superscripts indicate when a protein was identified in multiple spots. Synthesis of cytosolic proteins of untreated (green) and antibiotic-treated (red) *B. subtilis* were compared based on incorporation of radioactive [ $^{35}S$ ]-methionine. Arsenic reacts with thiols<sup>8</sup>. All sections show representative data.

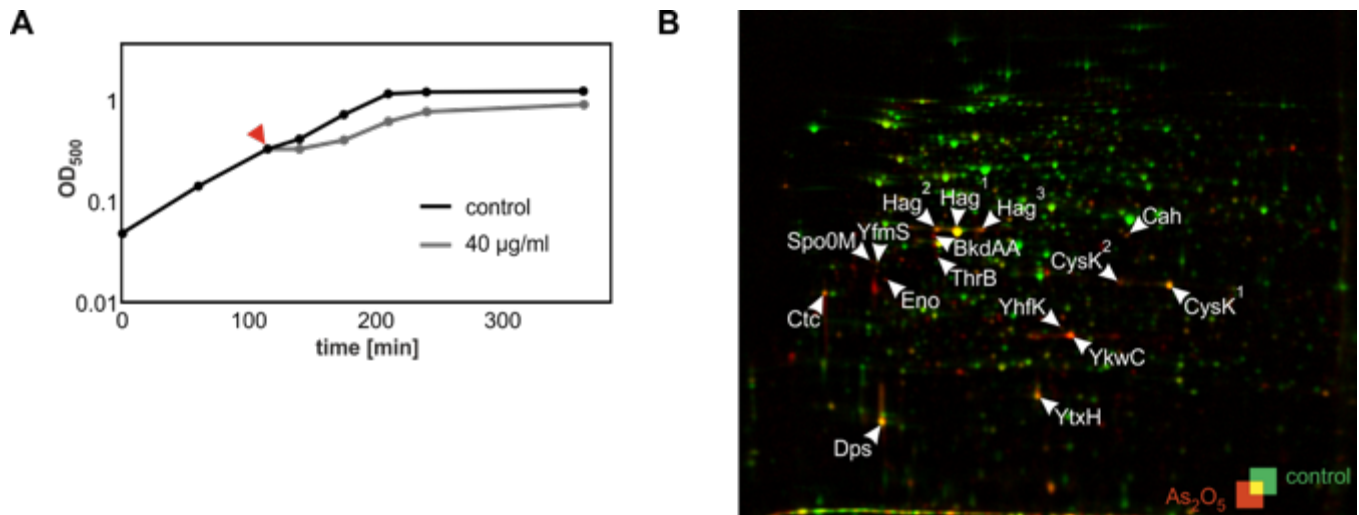

**Fig. S6 Proteomic response of *B. subtilis* towards  $As_2O_5$ .** (A) growth curves of *B. subtilis*, comparing an untreated control with a culture treated with  $As_2O_5$ . Identified marker proteins based on 2D-PAGE analysis of cytosolic proteins of *B. subtilis* treated with 40  $\mu g/ml$  (B) of  $As_2O_5$ . Superscripts indicate when a protein was identified in multiple spots. Synthesis of cytosolic proteins of untreated (green) and antibiotic-treated (red) *B. subtilis* were compared based on incorporation of radioactive [ $^{35}S$ ]-methionine. Arsenic reacts with thiols<sup>8</sup>. All sections show representative data.

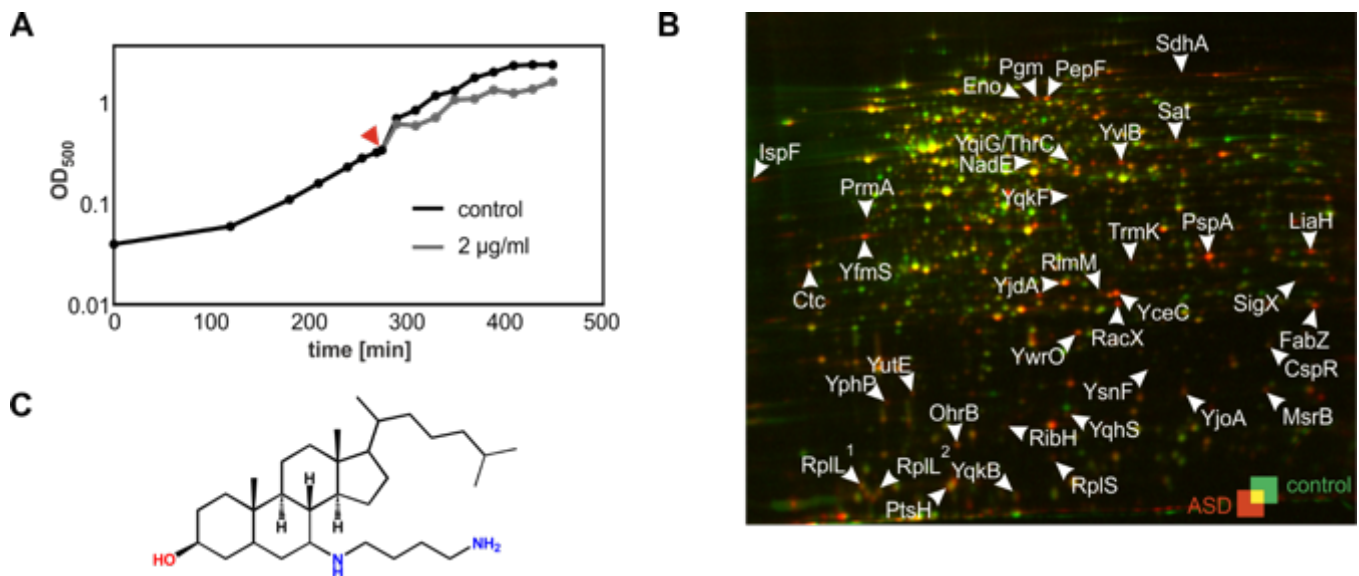

**Fig. S7 Proteomic response of *B. subtilis* towards ASD.** (A) growth curves of *B. subtilis*, comparing an untreated control with a culture treated with ASD. Identified marker proteins based on 2D-PAGE analysis of cytosolic proteins of *B. subtilis* treated with 2 µg/ml (B) of ASD (C). Superscripts indicate when a protein was identified in multiple spots. Synthesis of cytosolic proteins of untreated (green) and antibiotic-treated (red) *B. subtilis* were compared based on incorporation of radioactive [<sup>35</sup>S]-methionine. Squalamine-like compounds disturb bacterial membranes<sup>9</sup>. All sections show representative data.

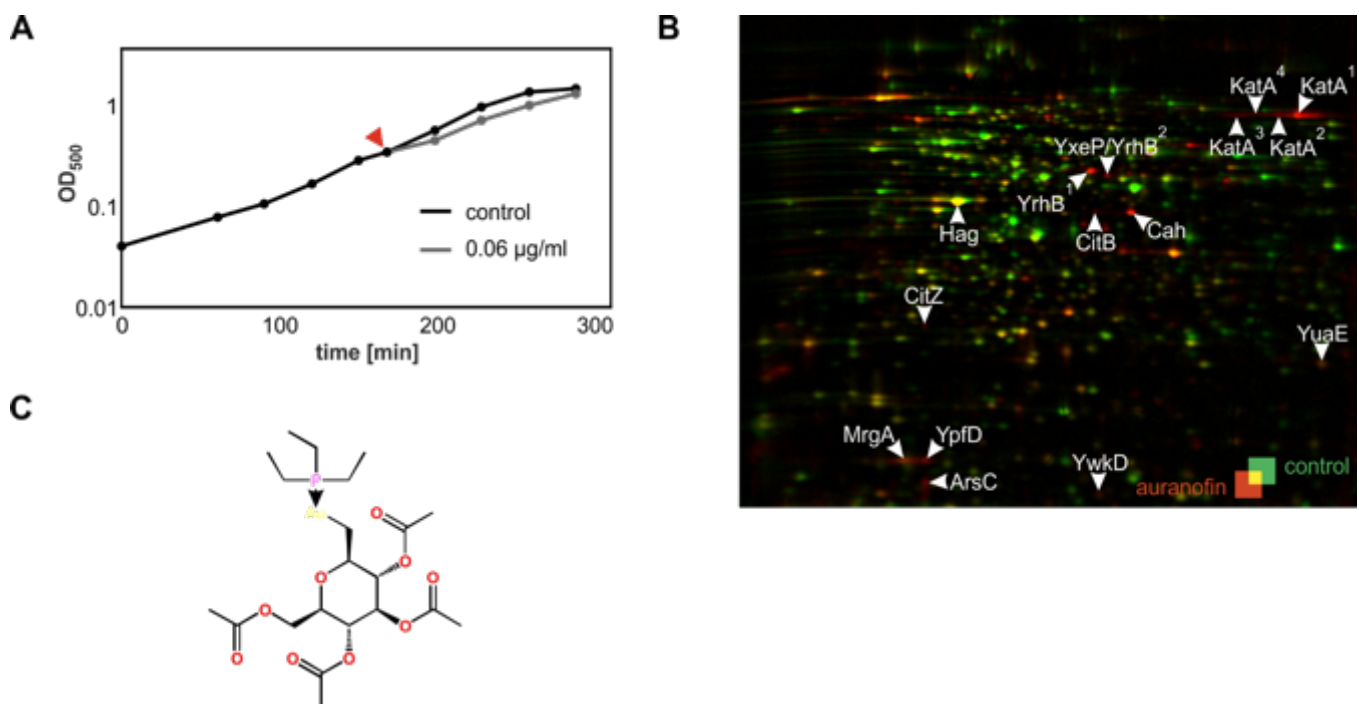

**Fig. S8 Proteomic response of *B. subtilis* towards auranofin.** (A) growth curves of *B. subtilis*, comparing an untreated control with a culture treated with auranofin. Identified marker proteins based on 2D-PAGE analysis of cytosolic proteins of *B. subtilis* treated with 0.06 µg/ml (B) of auranofin (C). Superscripts indicate when a protein was identified in multiple spots. Synthesis of cytosolic proteins of untreated (green) and antibiotic-treated (red) *B. subtilis* were compared based on incorporation of radioactive [<sup>35</sup>S]-methionine. Auranofin impairs the thiol-redox homeostasis of bacteria<sup>10</sup>. All sections show representative data.

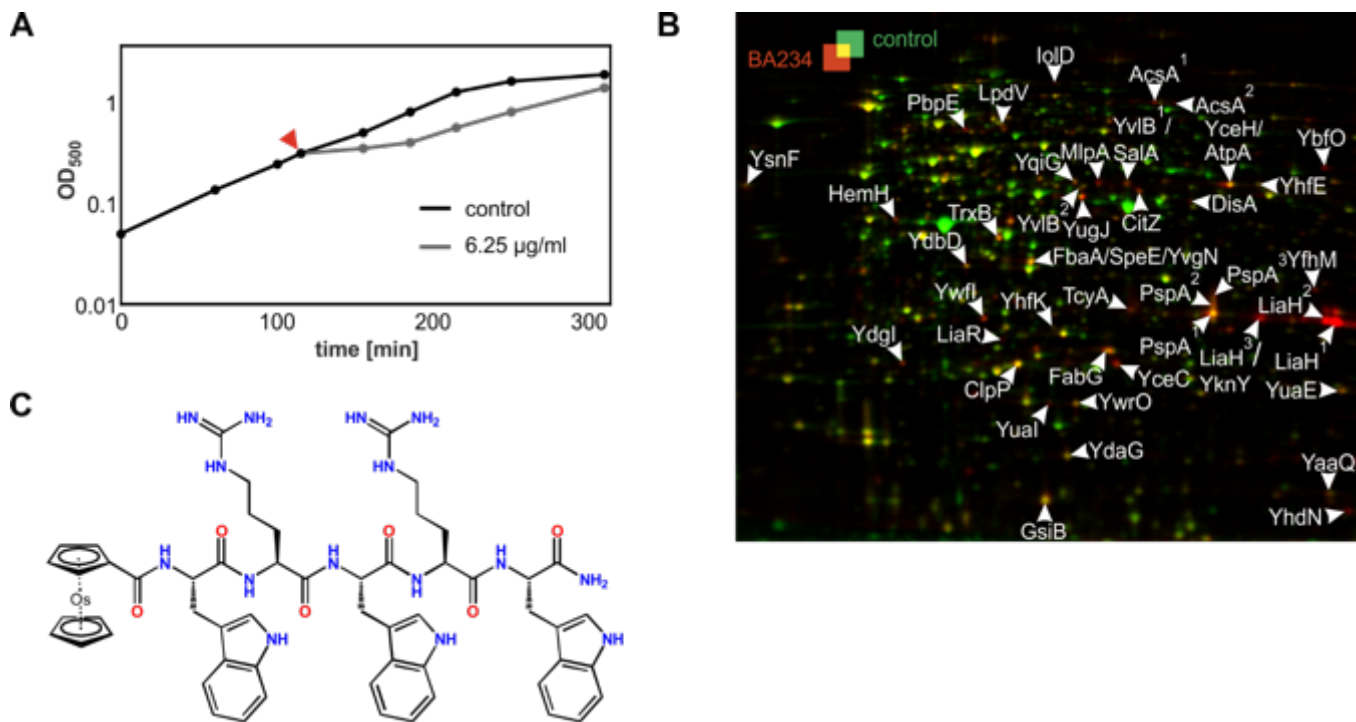

**Fig. S9 Proteomic response of *B. subtilis* towards BA234.** (A) growth curves of *B. subtilis*, comparing an untreated control with a culture treated with BA234. Identified marker proteins based on 2D-PAGE analysis of cytosolic proteins of *B. subtilis* treated with 6.25 µg/ml (B) of BA234 (C). Superscripts indicate when a protein was identified in multiple spots. Synthesis of cytosolic proteins of untreated (green) and antibiotic-treated (red) *B. subtilis* were compared based on incorporation of radioactive [<sup>35</sup>S]-methionine. BA234 disturbs the bacterial membrane. All sections show representative data.

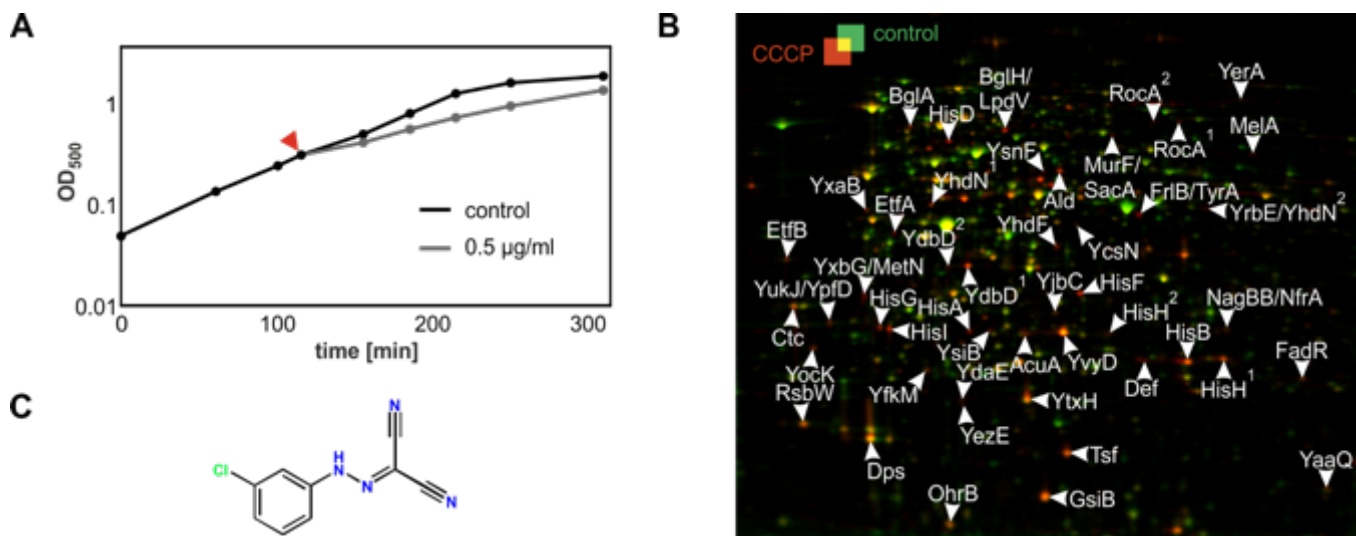

**Fig. S10 Proteomic response of *B. subtilis* towards CCCP.** (A) growth curves of *B. subtilis*, comparing an untreated control with a culture treated with CCCP. Identified marker proteins based on 2D-PAGE analysis of cytosolic proteins of *B. subtilis* treated with 0.5 µg/ml (B) of CCCP (C). Superscripts indicate when a protein was identified in multiple spots. Synthesis of cytosolic proteins of untreated (green) and antibiotic-treated (red) *B. subtilis* were compared based on incorporation of radioactive [<sup>35</sup>S]-methionine. CCCP is a protonophore and disturbs the respiratory chain<sup>11,12</sup>. All sections show representative data.

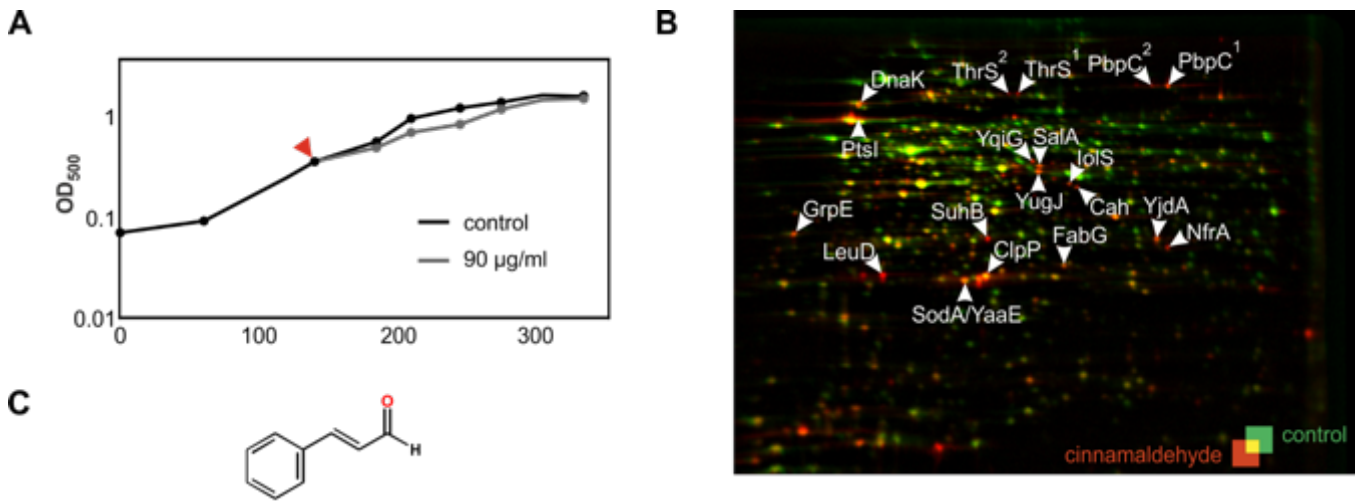

**Fig. S11 Proteomic response of *B. subtilis* towards cinnamaldehyde.** (A) growth curves of *B. subtilis*, comparing an untreated control with a culture treated with cinnamaldehyde. Identified marker proteins based on 2D-PAGE analysis of cytosolic proteins of *B. subtilis* treated with 90 µg/ml (B) of cinnamaldehyde (C). Superscripts indicate when a protein was identified in multiple spots. Synthesis of cytosolic proteins of untreated (green) and antibiotic-treated (red) *B. subtilis* were compared based on incorporation of radioactive [<sup>35</sup>S]-methionine. Cinnamaldehyde inhibits FtsZ, permeabilizes the membrane and reacts with thiols<sup>13-15</sup>. All sections show representative data.

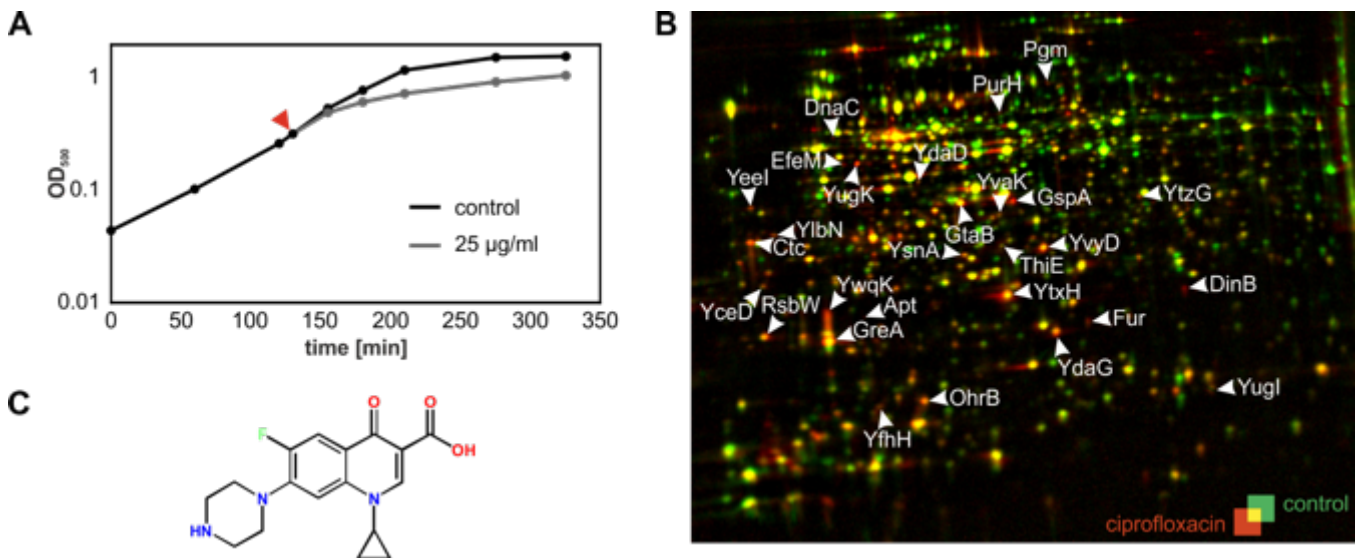

**Fig. S12 Proteomic response of *B. subtilis* towards ciprofloxacin.** (A) growth curves of *B. subtilis*, comparing an untreated control with a culture treated with ciprofloxacin. Identified marker proteins based on 2D-PAGE analysis of cytosolic proteins of *B. subtilis* treated with 25 µg/ml (B) of ciprofloxacin (C). Synthesis of cytosolic proteins of untreated (green) and antibiotic-treated (red) *B. subtilis* were compared based on incorporation of radioactive [<sup>35</sup>S]-methionine. Ciprofloxacin inhibits DNA gyrase and topoisomerase IV<sup>16-18</sup>. All sections show representative data.



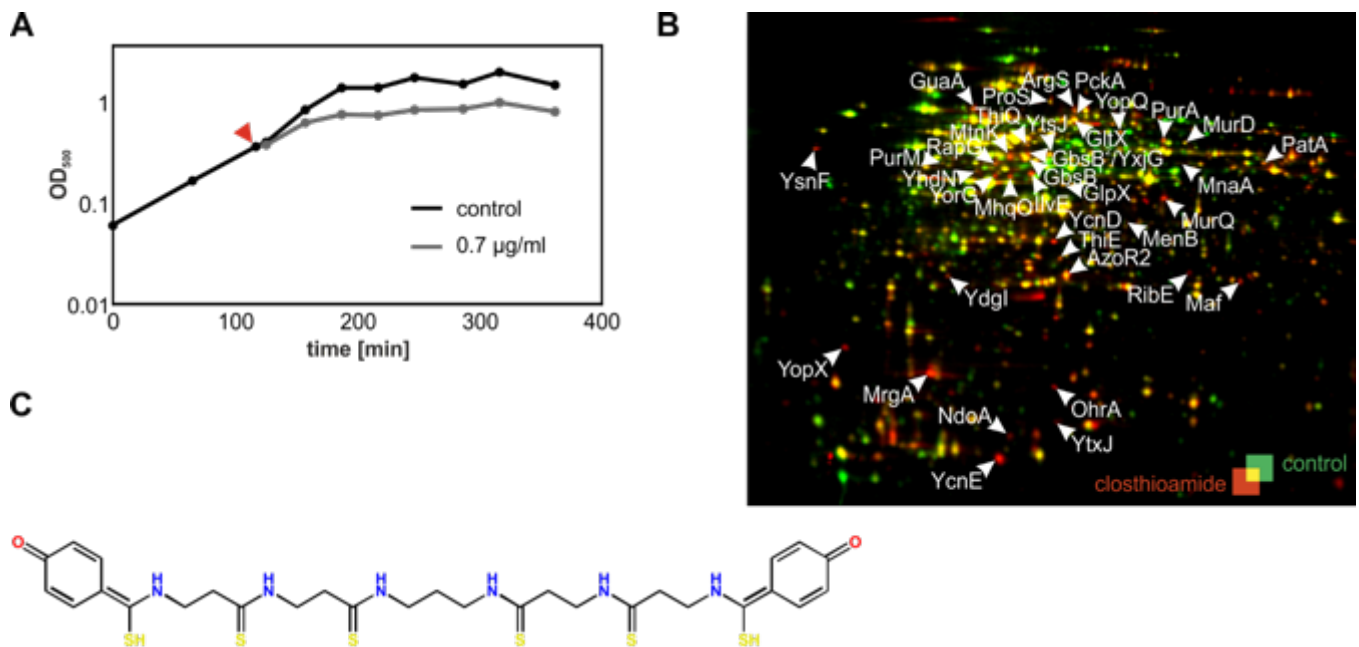

**Fig. S13 Proteomic response of *B. subtilis* towards closthioamide.** (A) growth curves of *B. subtilis*, comparing an untreated control with a culture treated with closthioamide. Identified marker proteins based on 2D-PAGE analysis of cytosolic proteins of *B. subtilis* treated with 0.7 µg/ml (B) of closthioamide (C). Superscripts indicate when a protein was identified in multiple spots. Synthesis of cytosolic proteins of untreated (green) and antibiotic-treated (red) *B. subtilis* were compared based on incorporation of radioactive [<sup>35</sup>S]-methionine. Closthioamide inhibits DNA gyrase and topoisomerase IV<sup>19</sup>. All sections show representative data.

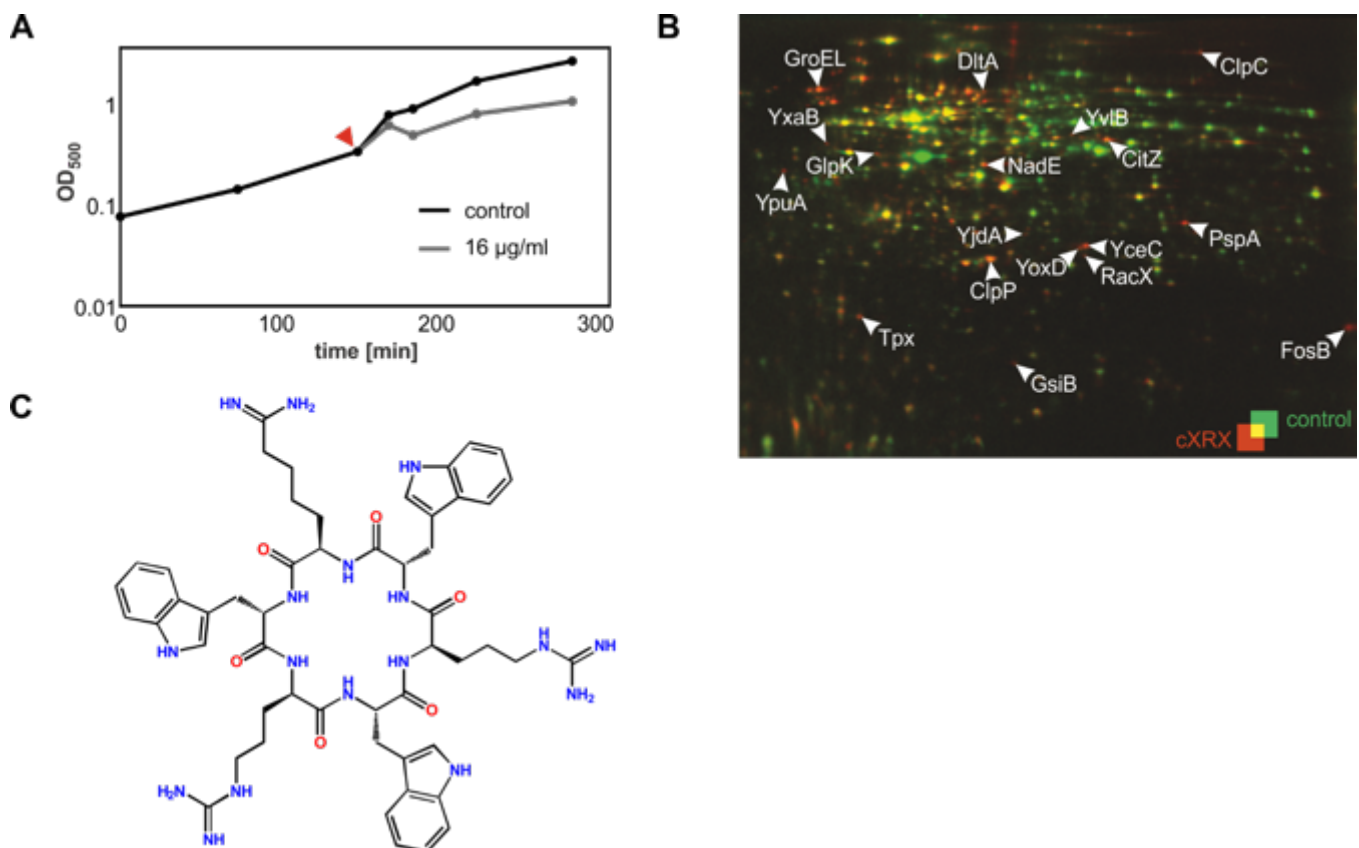

**Fig. S14 Proteomic response of *B. subtilis* towards cXRX.** (A) growth curves of *B. subtilis*, comparing an untreated control with a culture treated with cXRX. Identified marker proteins based on 2D-PAGE analysis of cytosolic proteins of *B. subtilis* treated with 16 µg/ml (B) of cXRX (C). Synthesis of cytosolic proteins of untreated (green) and antibiotic-treated (red) *B. subtilis* were compared based on incorporation of radioactive [<sup>35</sup>S]-methionine. cXRX disturbs the bacterial membrane. All sections show representative data.

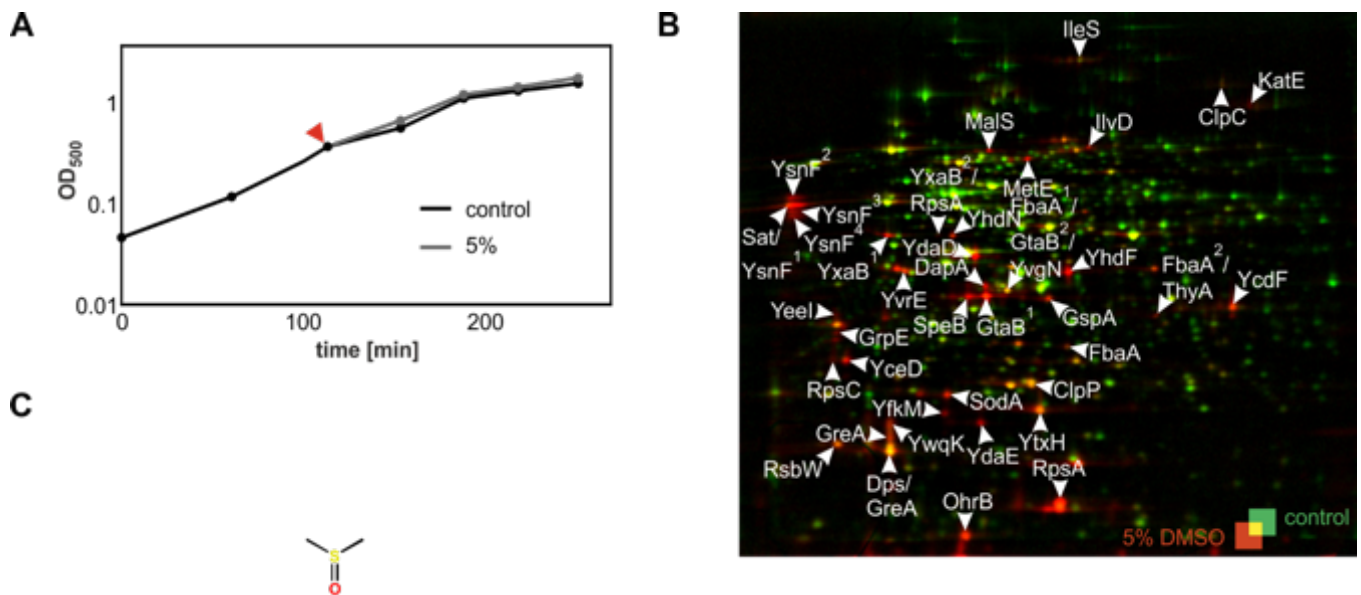

**Fig. S15 Proteomic response of *B. subtilis* towards 5% DMSO.** (A) growth curves of *B. subtilis*, comparing an untreated control with a culture treated with DMSO. Identified marker proteins based on 2D-PAGE analysis of cytosolic proteins of *B. subtilis* treated with 5% (B) of DMSO (C). Synthesis of cytosolic proteins of untreated (green) and solvent-treated (red) *B. subtilis* were compared based on incorporation of radioactive [<sup>35</sup>S]-methionine. All sections show representative data.

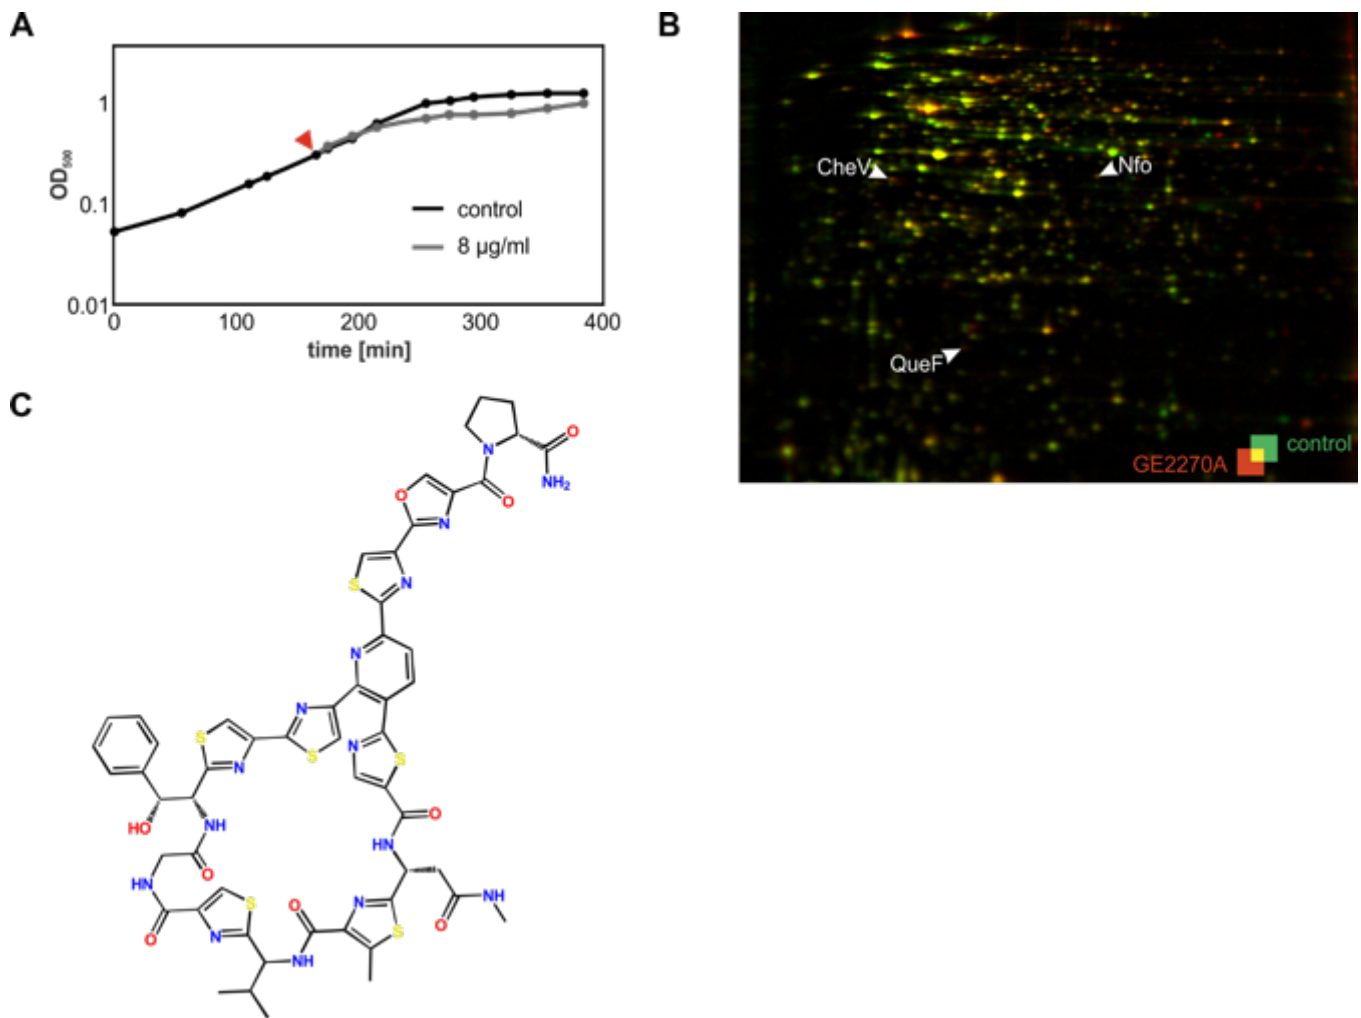

**Fig. S16 Proteomic response of *B. subtilis* towards GE2270A.** (A) growth curves of *B. subtilis*, comparing an untreated control with a culture treated with GE2270A. Identified marker proteins based on 2D-PAGE analysis of cytosolic proteins of *B. subtilis* treated with 8 µg/ml (B) of GE2270A (C). Synthesis of cytosolic proteins of untreated (green) and antibiotic-treated (red) *B. subtilis* were compared based on incorporation of radioactive [<sup>35</sup>S]-methionine. GE2270A binds the elongation factor Tu<sup>20,21</sup>. All sections show representative data.

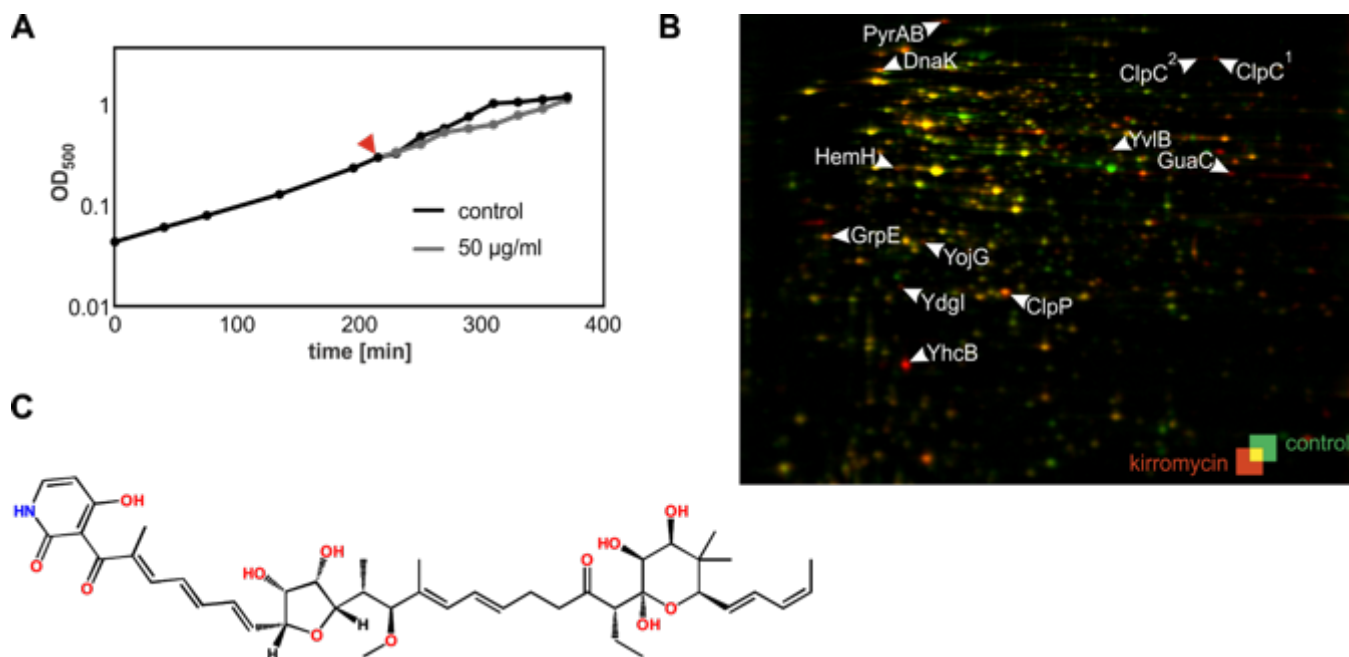

**Fig. S17 Proteomic response of *B. subtilis* towards kirromycin.** (A) growth curves of *B. subtilis*, comparing an untreated control with a culture treated with kirromycin. Identified marker proteins based on 2D-PAGE analysis of cytosolic proteins of *B. subtilis* treated with 50 µg/ml (B) of kirromycin (C). Superscripts indicate when a protein was identified in multiple spots. Synthesis of cytosolic proteins of untreated (green) and antibiotic-treated (red) *B. subtilis* were compared based on incorporation of radioactive [<sup>35</sup>S]-methionine. Kirromycin binds the elongation factor Tu<sup>22,23</sup>. All sections show representative data.



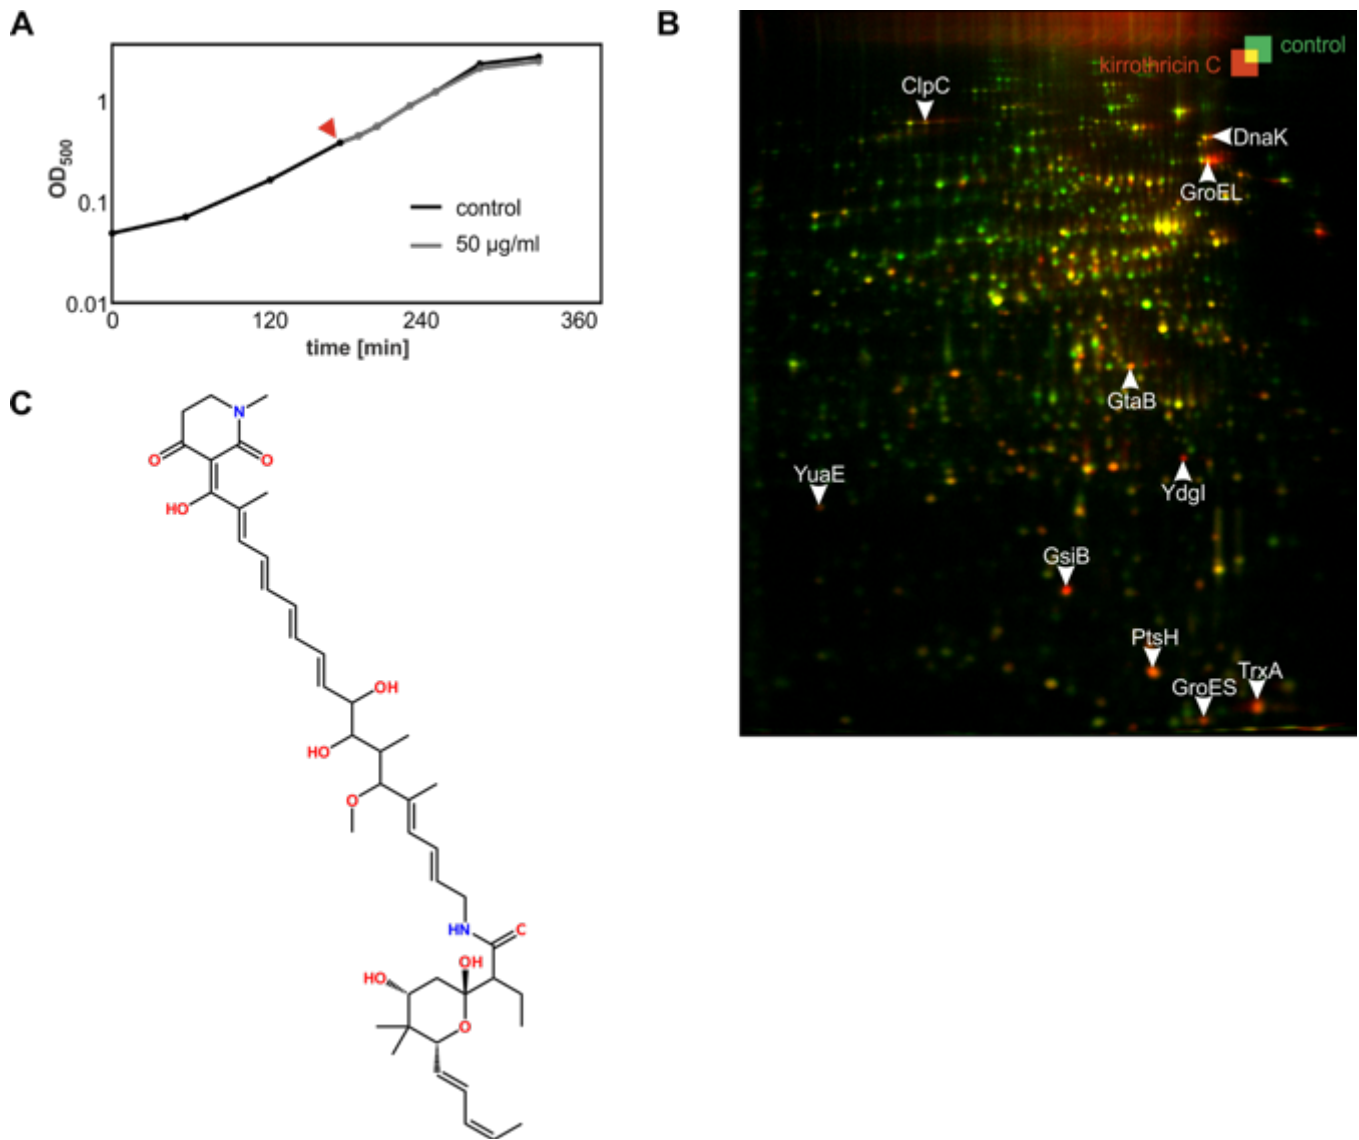

**Fig. S18 Proteomic response of *B. subtilis* towards kirrothricin C.** (A) growth curves of *B. subtilis*, comparing an untreated control with a culture treated with kirromycin. Identified marker proteins based on 2D-PAGE analysis of cytosolic proteins of *B. subtilis* treated with 100 µg/ml (B) of kirrothricin C (C), unlike the growth curve. Synthesis of cytosolic proteins of untreated (green) and antibiotic-treated (red) *B. subtilis* were compared based on incorporation of radioactive [<sup>35</sup>S]-methionine. Kirrothricin C binds to elongation factor Tu<sup>24</sup>. All sections show representative data.

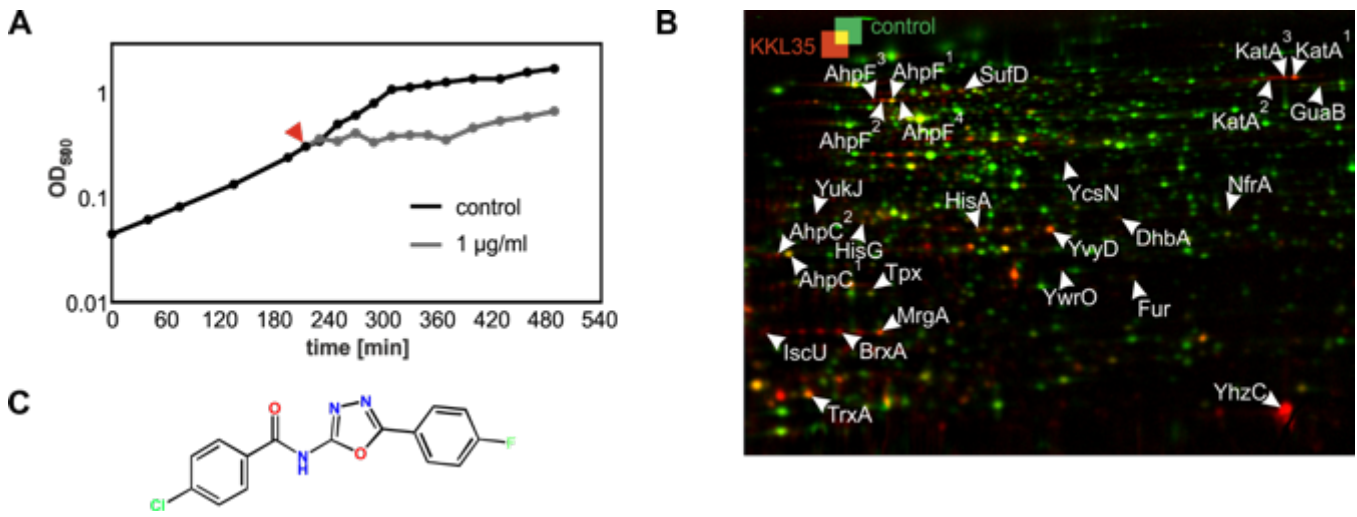

**Fig. S19 Proteomic response of *B. subtilis* towards KKL-35.** (A) growth curves of *B. subtilis*, comparing an untreated control with a culture treated with KKL-35. Identified marker proteins based on 2D-PAGE analysis of cytosolic proteins of *B. subtilis* treated with 1 µg/ml (B) of KKL-35 (C). Superscripts indicate when a protein was identified in multiple spots. Synthesis of cytosolic proteins of untreated (green) and antibiotic-treated (red) *B. subtilis* were compared based on incorporation of radioactive [<sup>35</sup>S]-methionine. KKL-35 inhibits *trans*-translation<sup>25</sup>. All sections show representative data.

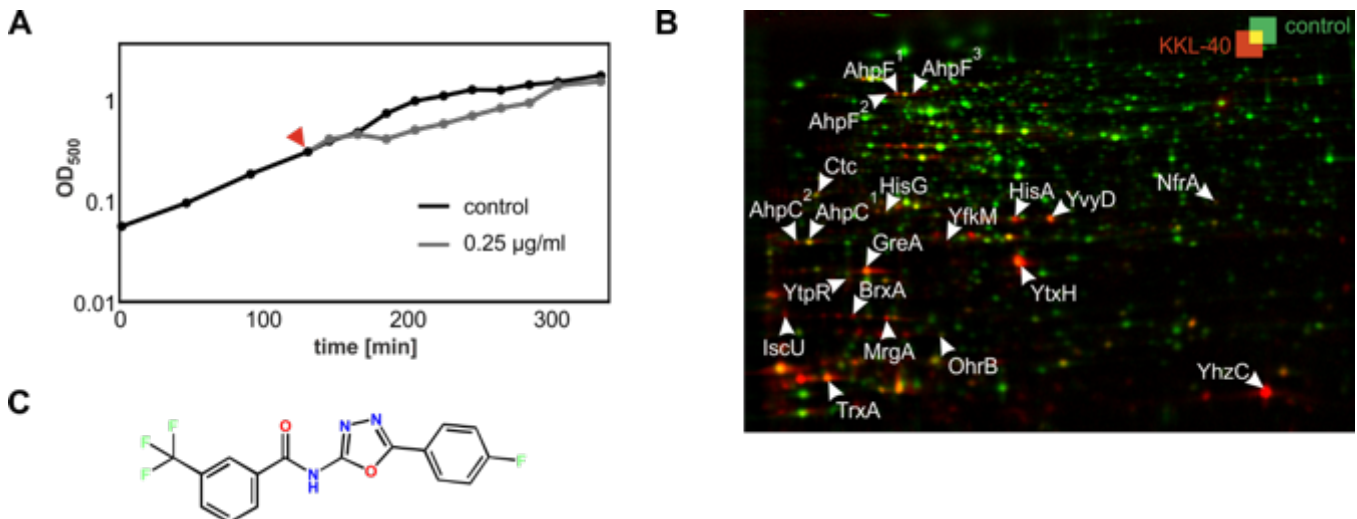

**Fig. S20 Proteomic response of *B. subtilis* towards KKL-40.** (A) growth curves of *B. subtilis*, comparing an untreated control with a culture treated with KKL-40. Identified marker proteins based on 2D-PAGE analysis of cytosolic proteins of *B. subtilis* treated with 0.25 µg/ml (B) of KKL-40 (C). Superscripts indicate when a protein was identified in multiple spots. Synthesis of cytosolic proteins of untreated (green) and antibiotic-treated (red) *B. subtilis* were compared based on incorporation of radioactive [<sup>35</sup>S]-methionine. KKL-40 inhibits *trans*-translation<sup>25</sup>. All sections show representative data.

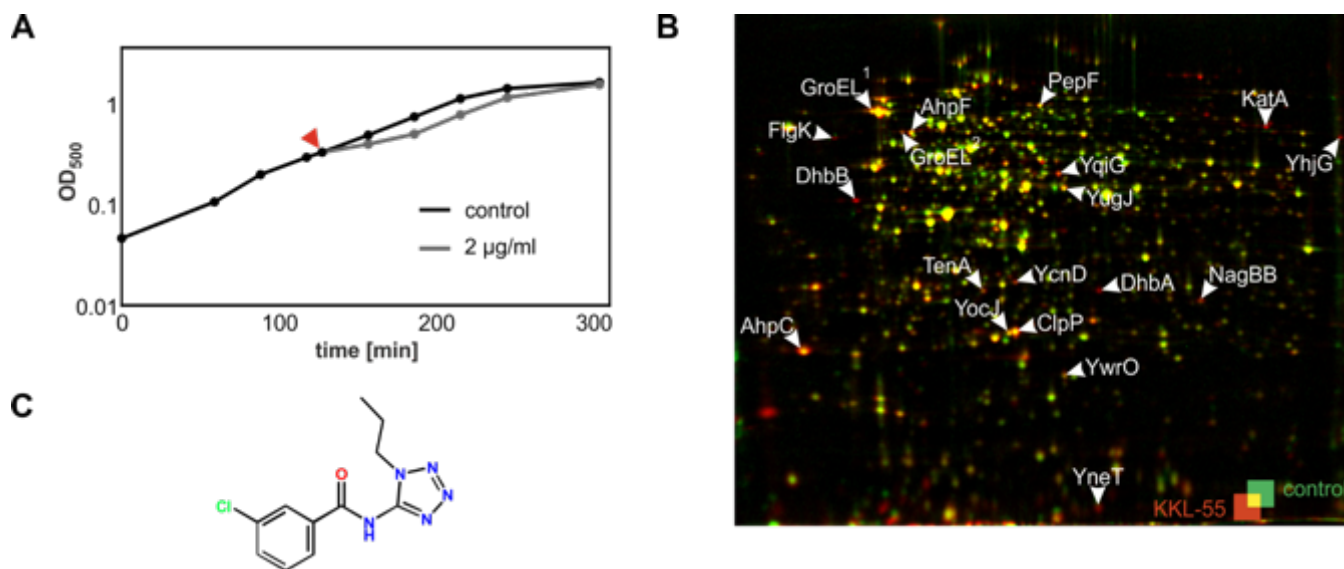

**Fig. S21 Proteomic response of *B. subtilis* towards KKL-55.** (A) growth curves of *B. subtilis*, comparing an untreated control with a culture treated with KKL-55. Identified marker proteins based on 2D-PAGE analysis of cytosolic proteins of *B. subtilis* treated with 2 µg/ml (B) of KKL-55 (C). Superscripts indicate when a protein was identified in multiple spots. Synthesis of cytosolic proteins of untreated (green) and antibiotic-treated (red) *B. subtilis* were compared based on incorporation of radioactive [<sup>35</sup>S]-methionine. KKL-55 inhibits *trans*-translation<sup>25</sup>. All sections show representative data.

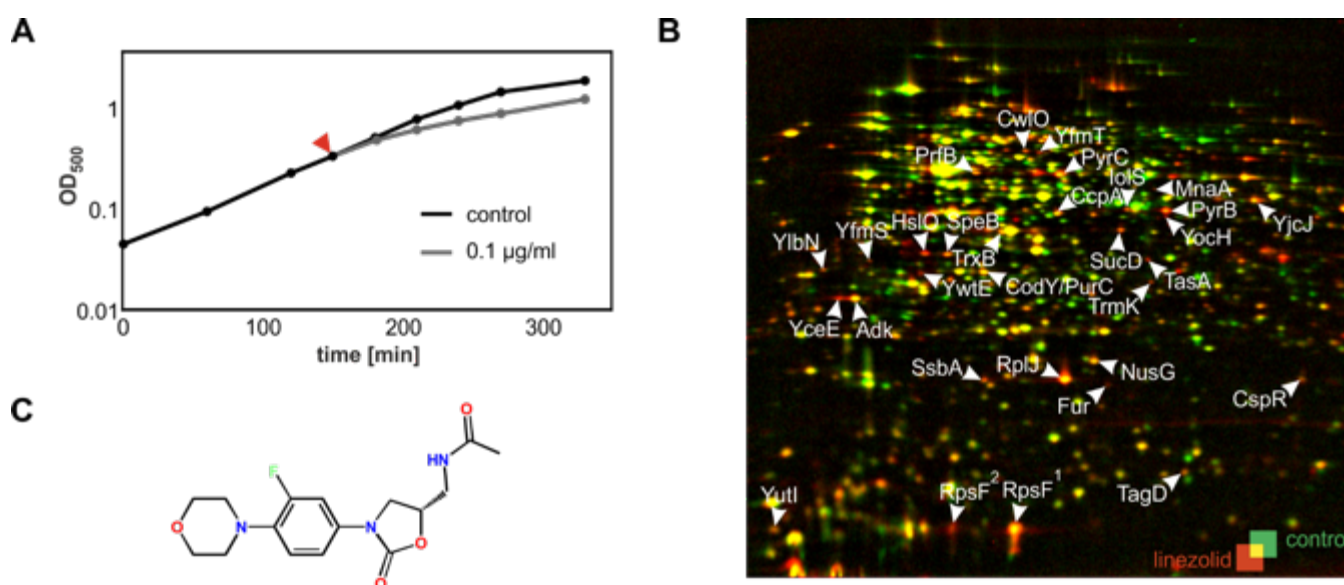

**Fig. S22 Proteomic response of *B. subtilis* towards linezolid.** (A) growth curves of *B. subtilis*, comparing an untreated control with a culture treated with linezolid. Identified marker proteins based on 2D-PAGE analysis of cytosolic proteins of *B. subtilis* treated with 0.1 µg/ml (B) of linezolid (C). Superscripts indicate when a protein was identified in multiple spots. Synthesis of cytosolic proteins of untreated (green) and antibiotic-treated (red) *B. subtilis* were compared based on incorporation of radioactive [<sup>35</sup>S]-methionine. Linezolid inhibits protein synthesis<sup>26,27</sup>. All sections show representative data.

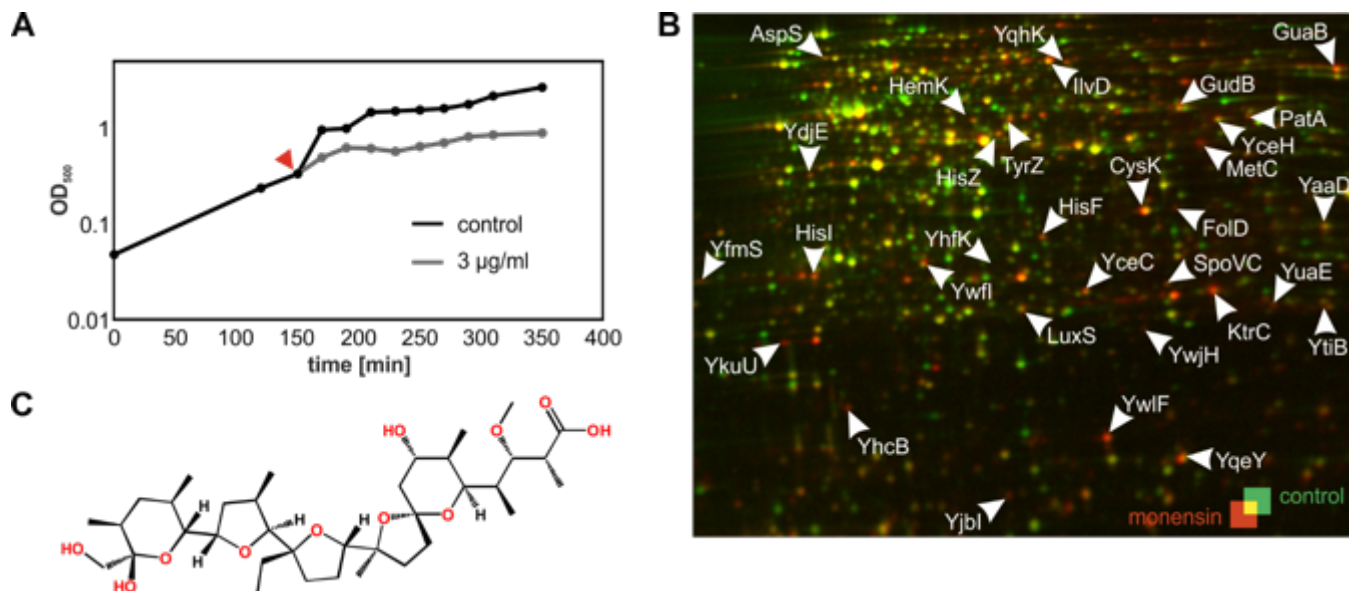

**Fig. S23 Proteomic response of *B. subtilis* towards monensin.** (A) growth curves of *B. subtilis*, comparing an untreated control with a culture treated with monensin. Identified marker proteins based on 2D-PAGE analysis of cytosolic proteins of *B. subtilis* treated with 3 µg/ml (B) of monensin (C). Synthesis of cytosolic proteins of untreated (green) and antibiotic-treated (red) *B. subtilis* were compared based on incorporation of radioactive [<sup>35</sup>S]-methionine. Monensin is an ionophor, which transports monovalent cations over biological membranes<sup>28,29</sup>. All sections show representative data.



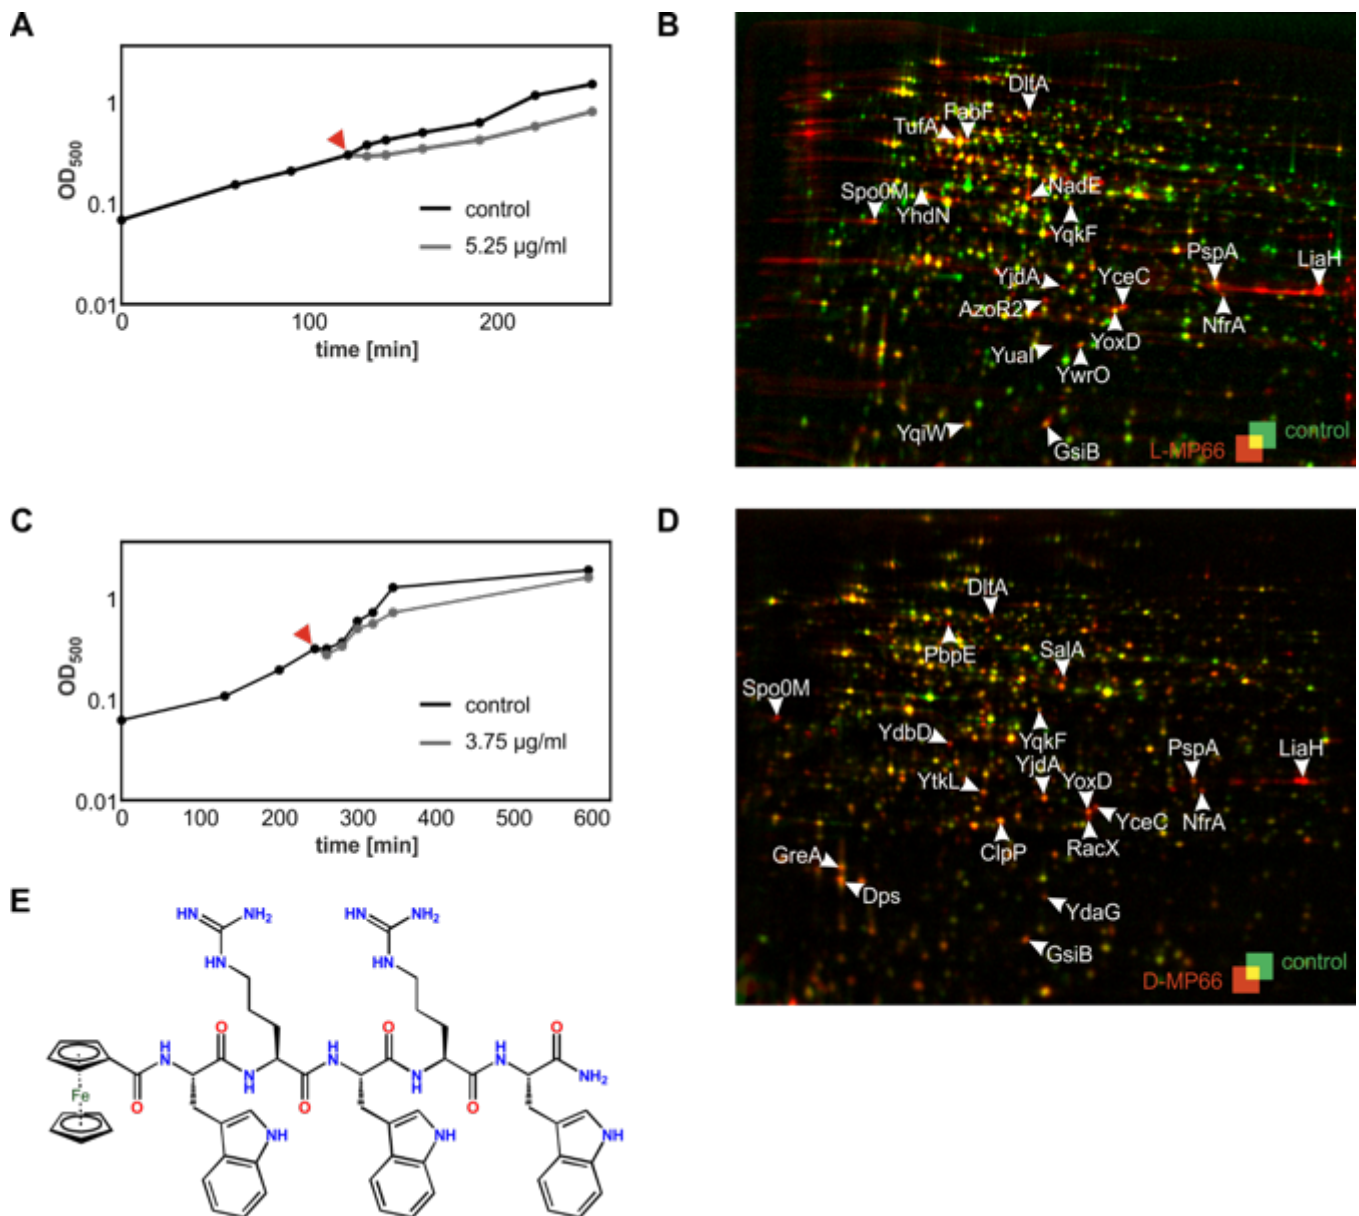

**Fig. S24 Proteomic response of *B. subtilis* towards L-MP66 and D-MP66.** (A) growth curves of *B. subtilis*, comparing an untreated control with a culture treated with L-MP66. Identified marker proteins based on 2D-PAGE analysis of cytosolic proteins of *B. subtilis* treated with 5.25 µg/ml (B) of L-MP66. (C) growth curves of *B. subtilis*, comparing an untreated control with a culture treated with D-MP66. Identified marker proteins based on 2D-PAGE analysis of cytosolic proteins of *B. subtilis* treated with 3.75 µg/ml of D-MP66. (D) Synthesis of cytosolic proteins of untreated (green) and antibiotic-treated (red) *B. subtilis* were compared based on incorporation of radioactive [<sup>35</sup>S]-methionine. Cells were treated with MP66 (E) synthesized either based on L- or D-amino acids. MP66 disturbs bacterial membranes. All sections show representative data.

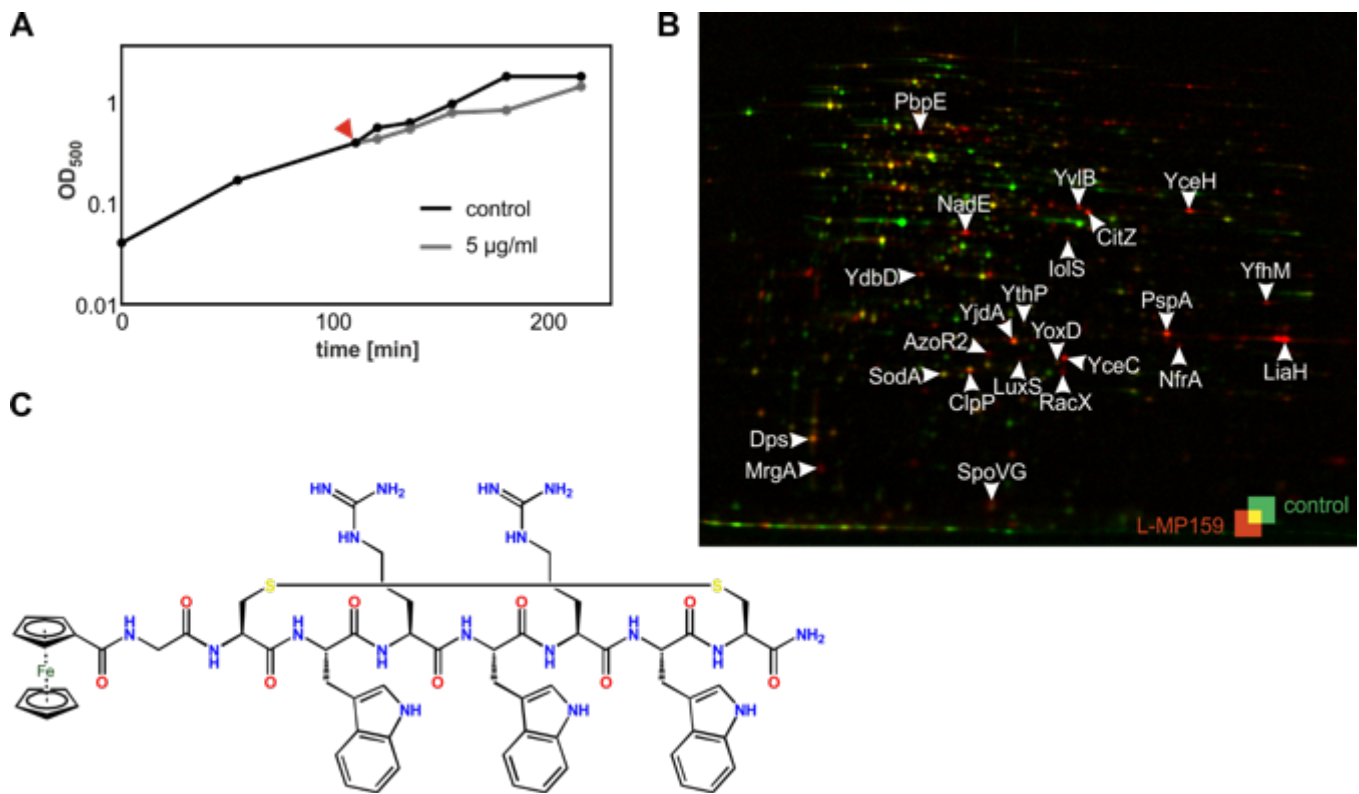

**Fig. S25 Proteomic response of *B. subtilis* towards MP159.** (A) growth curves of *B. subtilis*, comparing an untreated control with a culture treated with L-MP159. Identified marker proteins based on 2D-PAGE analysis of cytosolic proteins of *B. subtilis* treated with 5 µg/ml (B) of L-MP159 (C). Synthesis of cytosolic proteins of untreated (green) and antibiotic-treated (red) *B. subtilis* were compared based on incorporation of radioactive [<sup>35</sup>S]-methionine. MP159 disturbs bacterial membranes. All sections show representative data.

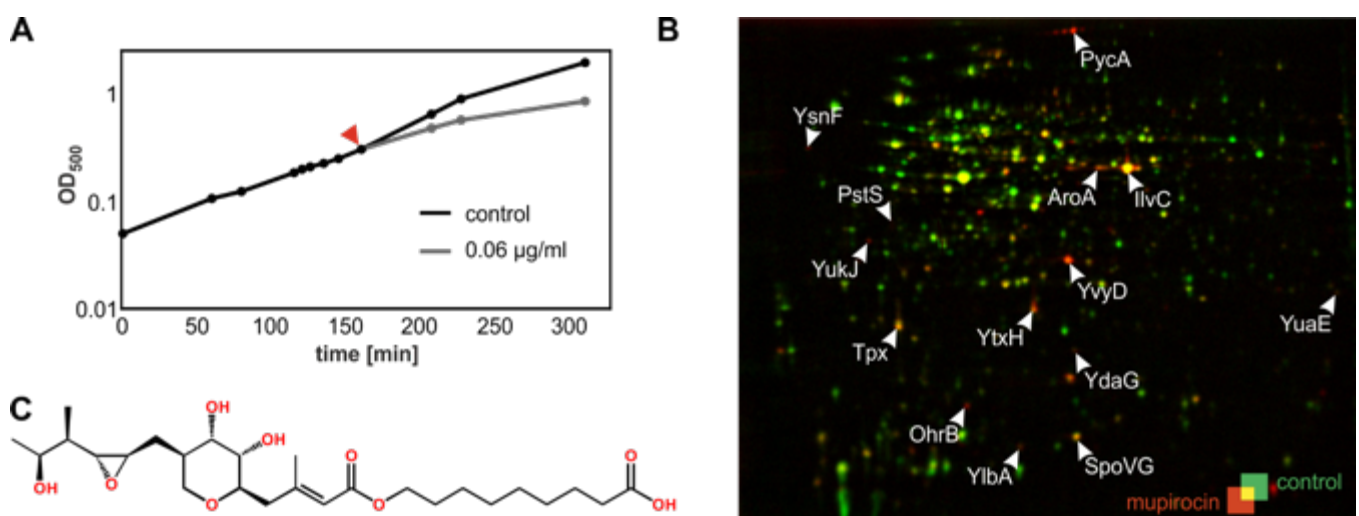

**Fig. S26 Proteomic response of *B. subtilis* towards mupirocin.** (A) growth curves of *B. subtilis*, comparing an untreated control with a culture treated with mupirocin. Identified marker proteins based on 2D-PAGE analysis of cytosolic proteins of *B. subtilis* treated with 0.06 µg/ml (B) of mupirocin (C). Synthesis rates of cytosolic proteins of untreated (green) and antibiotic-treated (red) *B. subtilis* were compared based on incorporation of radioactive [<sup>35</sup>S]-methionine. Mupirocin inhibits protein synthesis by disturbing the synthesis of isoleucyl tRNAs<sup>30,31</sup>. All sections show representative data.

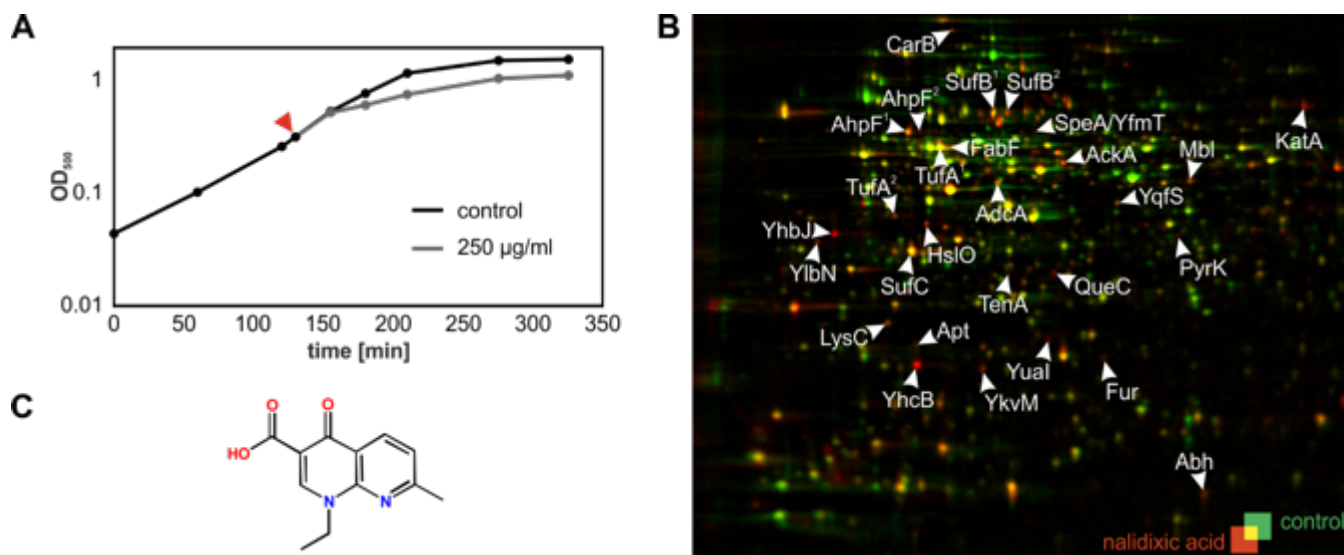

**Fig. S27 Proteomic response of *B. subtilis* towards nalidixic acid.** (A) growth curves of *B. subtilis*, comparing an untreated control with a culture treated with nalidixic acid. Identified marker proteins based on 2D-PAGE analysis of cytosolic proteins of *B. subtilis* treated with 250 µg/ml (B) of nalidixic acid (C). Superscripts indicate when a protein was identified in multiple spots. Synthesis of cytosolic proteins of untreated (green) and antibiotic-treated (red) *B. subtilis* were compared based on incorporation of radioactive [<sup>35</sup>S]-methionine. Nalidixic acid inhibits DNA gyrase and topoisomerase IV<sup>18,32</sup>. All sections show representative data.

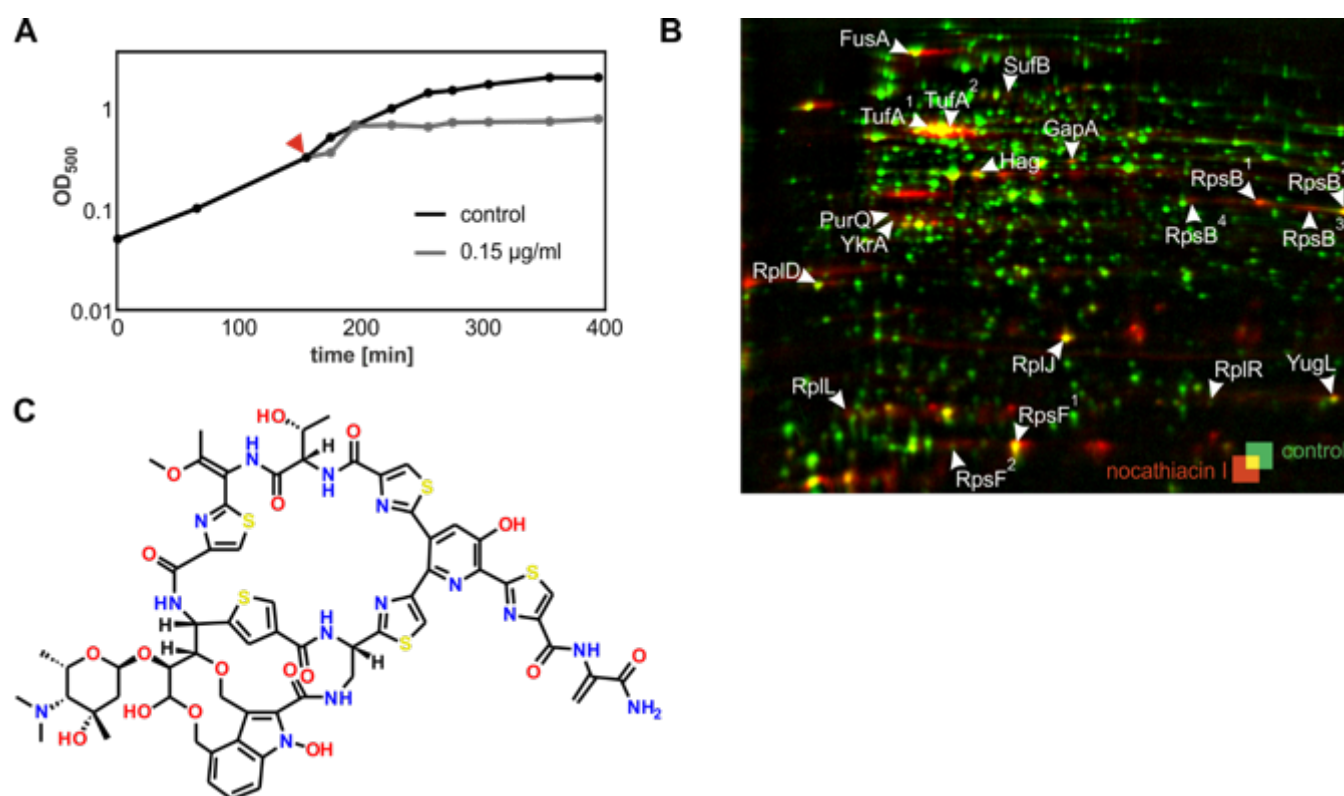

**Fig. S28 Proteomic response of *B. subtilis* towards nocathiacin I.** (A) growth curves of *B. subtilis*, comparing an untreated control with a culture treated with nocathiacin I. Identified marker proteins based on 2D-PAGE analysis of cytosolic proteins of *B. subtilis* treated with 0.15 µg/ml (B) of nocathiacin I (C). Superscripts indicate when a protein was identified in multiple spots. Synthesis of cytosolic proteins of untreated (green) and antibiotic-treated (red) *B. subtilis* were compared based on incorporation of radioactive [<sup>35</sup>S]-methionine. Nocathiacin I inhibits the elongation factor Tu<sup>23,33</sup>. All sections show representative data.



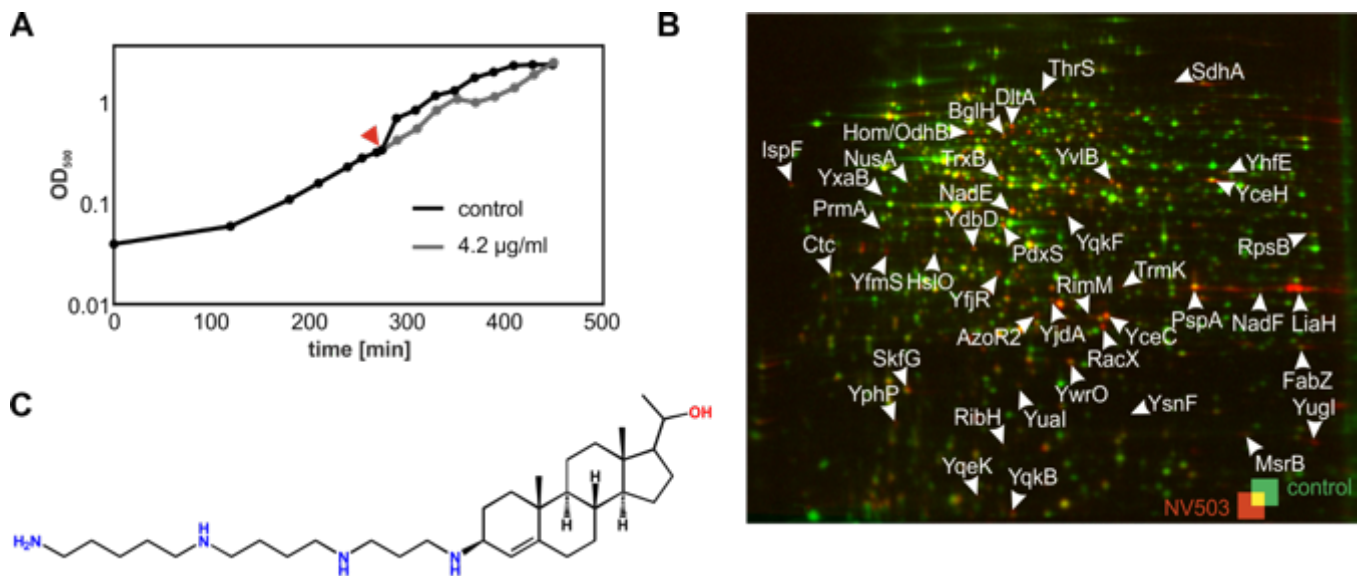

**Fig. S29 Proteomic response of *B. subtilis* towards NV503.** (A) growth curves of *B. subtilis*, comparing an untreated control with a culture treated with NV503. Identified marker proteins based on 2D-PAGE analysis of cytosolic proteins of *B. subtilis* treated with 4.2 µg/ml (B) of NV503 (C). Synthesis of cytosolic proteins of untreated (green) and antibiotic-treated (red) *B. subtilis* were compared based on incorporation of radioactive [<sup>35</sup>S]-methionine. Squalamine-like compounds disturb bacterial membranes<sup>9</sup>. All sections show representative data.

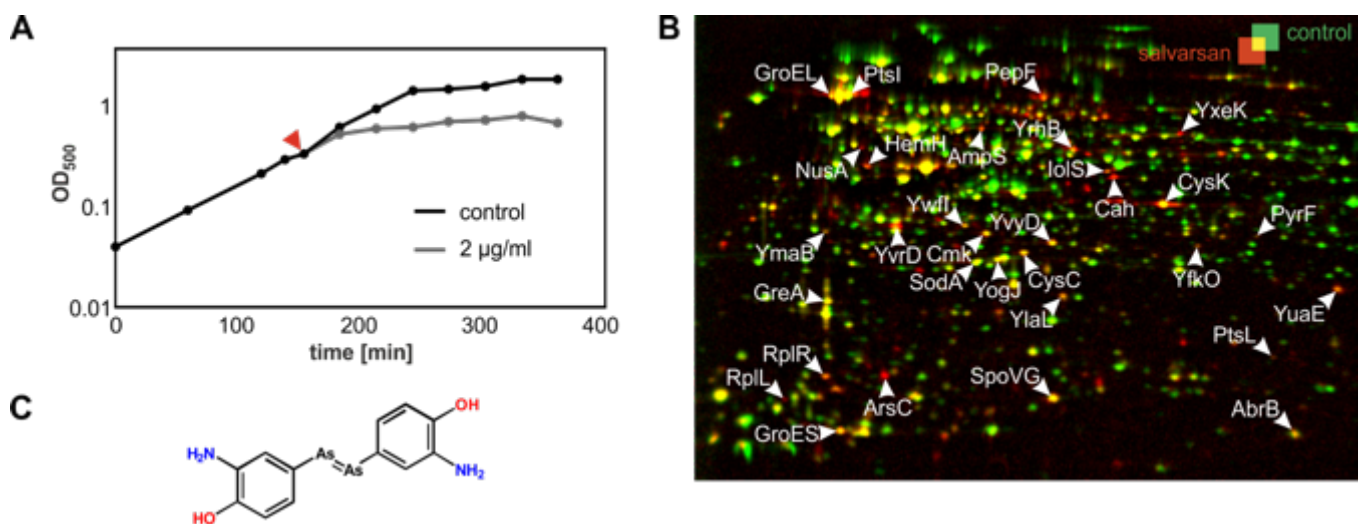

**Fig. S30 Proteomic response of *B. subtilis* towards salvarsan.** (A) growth curves of *B. subtilis*, comparing an untreated control with a culture treated with salvarsan. Identified marker proteins based on 2D-PAGE analysis of cytosolic proteins of *B. subtilis* treated with 2 µg/ml (B) of salvarsan (C). Salvarsan was used as a mixture of the dimeric (C), trimeric, and pentameric form. Synthesis of cytosolic proteins of untreated (green) and antibiotic-treated (red) *B. subtilis* were compared based on incorporation of radioactive [<sup>35</sup>S]-methionine. The mechanism of action of salvarsan is unknown. All sections show representative data.



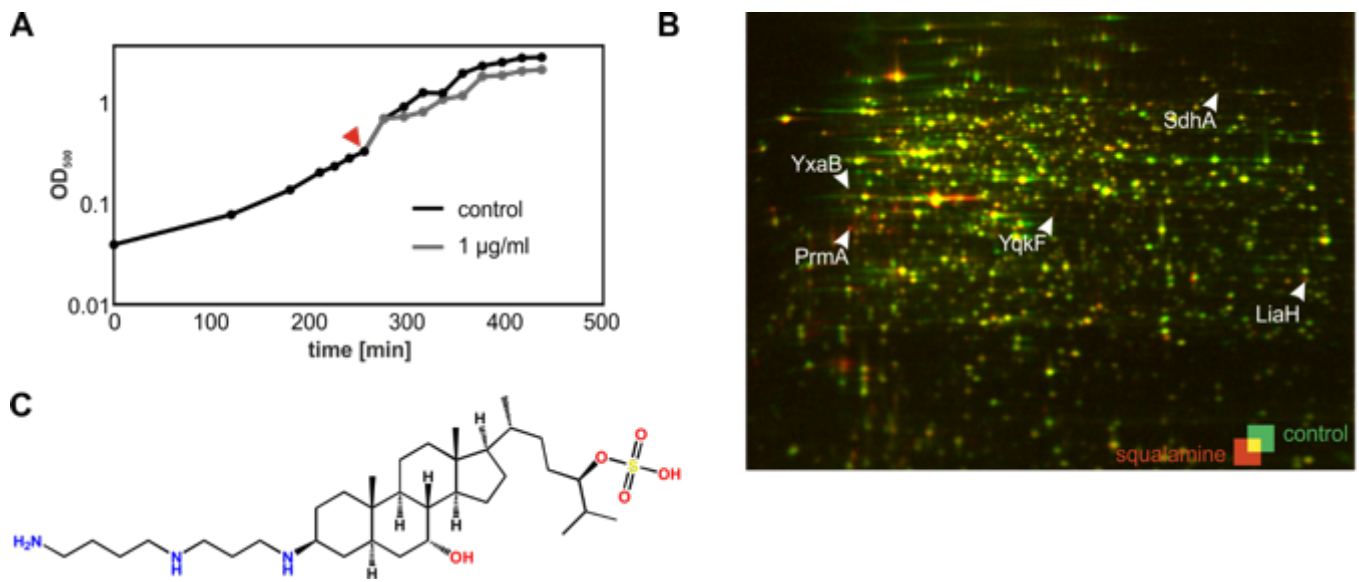

**Fig. S31 Proteomic response of *B. subtilis* towards squalamine.** (A) growth curves of *B. subtilis*, comparing an untreated control with a culture treated with squalamine. Identified marker proteins based on 2D-PAGE analysis of cytosolic proteins of *B. subtilis* treated with 1 µg/ml (B) of squalamine (C). Synthesis of cytosolic proteins of untreated (green) and antibiotic-treated (red) *B. subtilis* were compared based on incorporation of radioactive [<sup>35</sup>S]-methionine. Squalamine disturbs the bacterial membrane<sup>8,34</sup>. All sections show representative data.

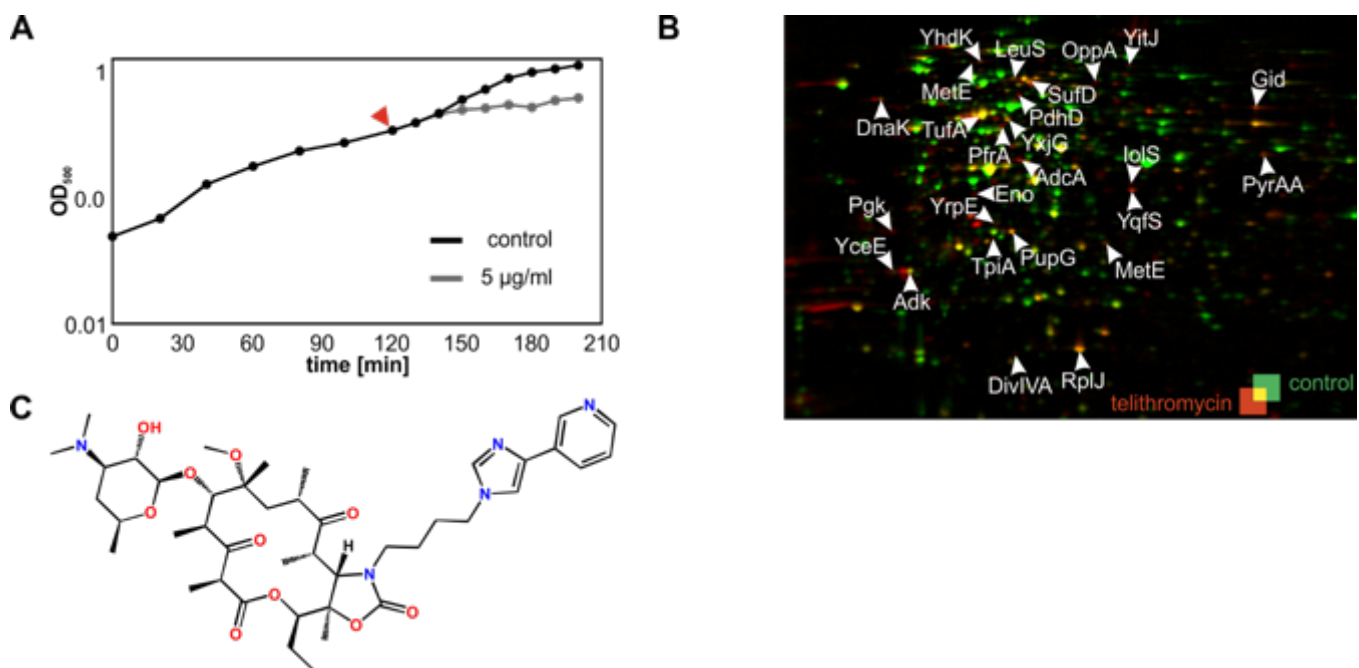

**Fig. S32 Proteomic response of *B. subtilis* towards telithromycin.** (A) growth curves of *B. subtilis*, comparing an untreated control with a culture treated with telithromycin. Identified marker proteins based on 2D-PAGE analysis of cytosolic proteins of *B. subtilis* treated with 5 µg/ml (B) of telithromycin (C). Synthesis of cytosolic proteins of untreated (green) and antibiotic-treated (red) *B. subtilis* were compared based on incorporation of radioactive [<sup>35</sup>S]-methionine. Telithromycin inhibits bacterial protein synthesis<sup>35,36</sup>. All sections show representative data.

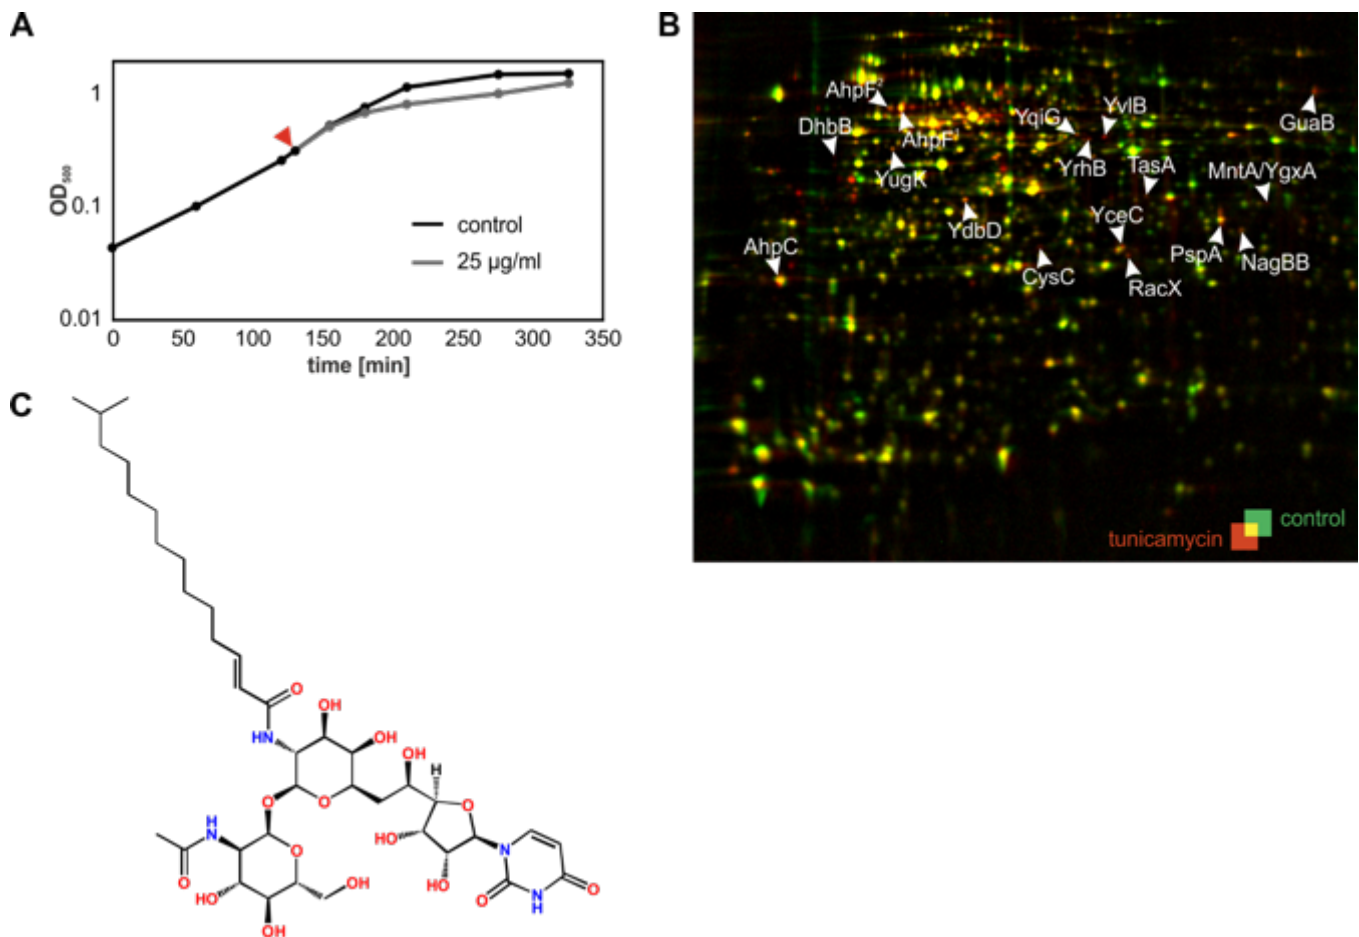

**Fig. S33 Proteomic response of *B. subtilis* towards tunicamycin.** (A) growth curves of *B. subtilis*, comparing an untreated control with a culture treated with tunicamycin. Identified marker proteins based on 2D-PAGE analysis of cytosolic proteins of *B. subtilis* treated with 25 µg/ml (B) of tunicamycin (C). Superscripts indicate when a protein was identified in multiple spots. Synthesis rates of cytosolic proteins of untreated (green) and antibiotic-treated (red) *B. subtilis* were compared based on incorporation of radioactive [<sup>35</sup>S]-methionine. Tunicamycin inhibits cell wall biosynthesis<sup>37-39</sup>. All sections show representative data.

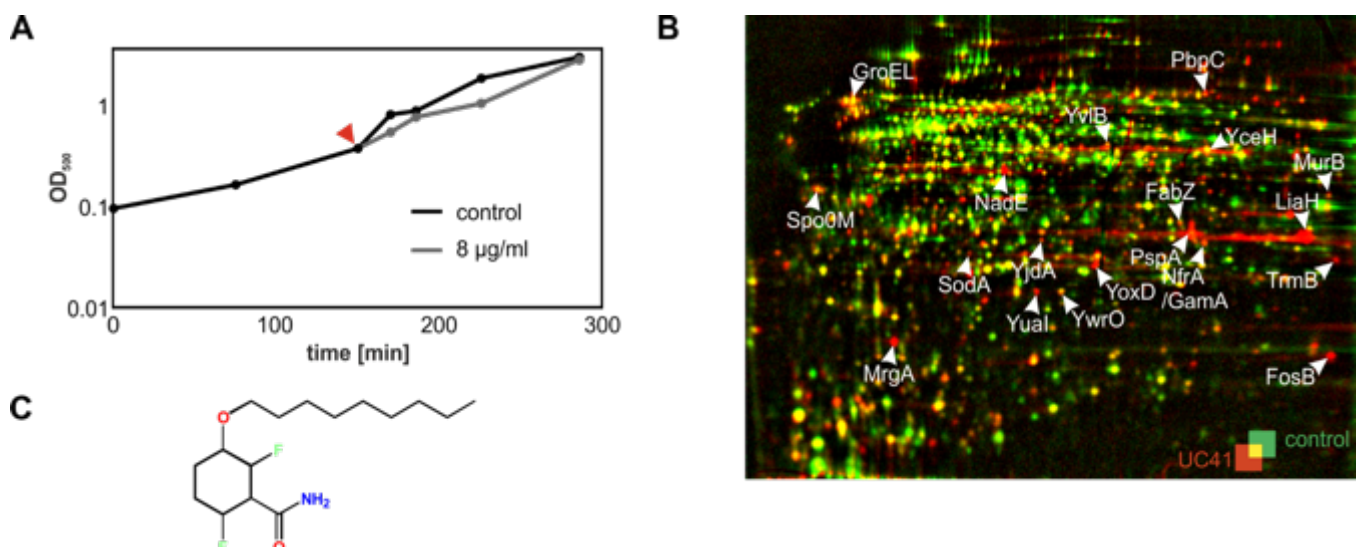

**Fig. S34 Proteomic response of *B. subtilis* towards UC41.** (A) growth curves of *B. subtilis*, comparing an untreated control with a culture treated with UC41. Identified marker proteins based on 2D-PAGE analysis of cytosolic proteins of *B. subtilis* treated with 8 µg/ml (B) of UC41 (C). Synthesis of cytosolic proteins of untreated (green) and antibiotic-treated (red) *B. subtilis* were compared based on incorporation of radioactive [<sup>35</sup>S]-methionine. The mechanism of action of UC41 is not known. All sections show representative data.

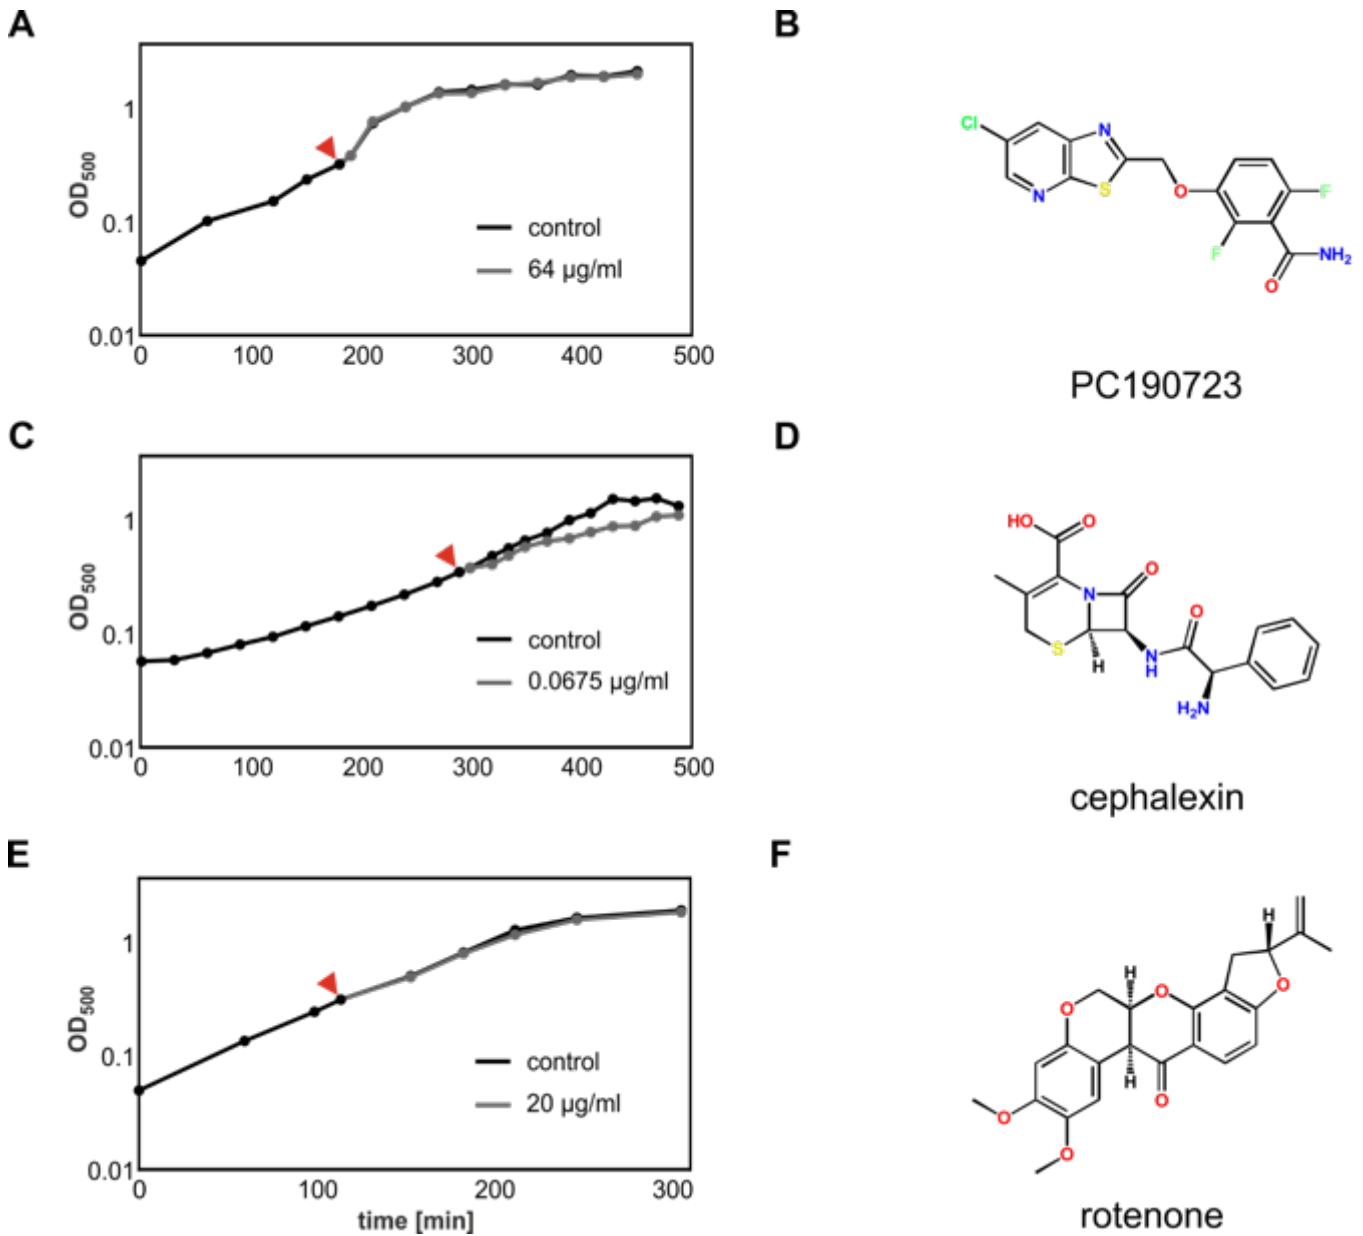

**Fig. S35 Growth of *B. subtilis* treated with PC190723, cephalixin, or rotenone.** (A) growth curves of *B. subtilis*, comparing an untreated control with a culture treated with 64  $\mu\text{g/ml}$  of (B) PC190723. (C) growth curves of *B. subtilis* comparing an untreated control with a culture treated with 0.0675  $\mu\text{g/ml}$  of (D) cephalixin. (E) growth curves of *B. subtilis*, comparing an untreated control with a culture treated with 20  $\mu\text{g/ml}$  of (F) rotenone. Red arrows indicate the addition of the antibiotic. PC190723 is an inhibitor of FtsZ<sup>40</sup>. Cephalixin inhibits the synthesis of the bacterial cell wall<sup>41,42</sup>. Rotenone is an inhibitor of the electron transport chain<sup>43</sup> but the NADH dehydrogenase of *B. subtilis* is insensitive to rotenone<sup>44</sup>. These substances did not induce marker proteins.

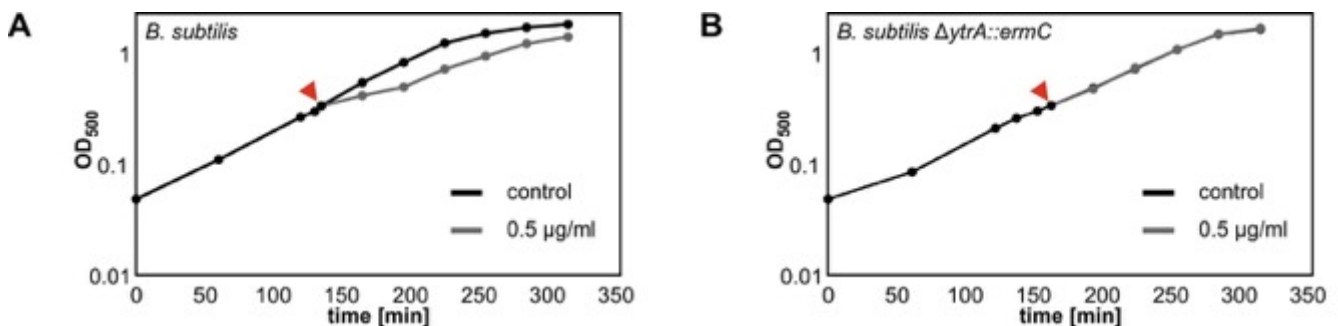

**Fig. S36 The *ytrGABCDEF* operon conveys resistance against nisin.** (A) Growth curves of *B. subtilis* comparing growth of an untreated control to a culture treated with 0.5  $\mu\text{g/ml}$  nisin. (B) Growth curves of a *B. subtilis* *ytrA* knock-out mutant comparing growth of an untreated control with a culture treated with 0.5  $\mu\text{g/ml}$  nisin. YtrA represses expression of the *ytrGABCDEF* operon<sup>45</sup>. All sections show representative data.

## Step-by-step protocol

The procedure described here uses the data set described in the associated publication as an example. The method itself can be applied to different types of data, as we compare datapoints (marker proteins) of conditions (compound A/B/...), based on the corresponding values (2.6/2.9/...).

1. Organize the data in a table with marker protein names filling the first column. Subsequent columns contain corresponding regulation factors obtained through treatment with a certain compound or under certain treatment conditions.

| marker proteins | compound A | compound B |
|-----------------|------------|------------|
| protein A       | 2.6        | 2.9        |
| protein B       | 10.5       | 0.0        |
| protein C       | 16.8       | 33.2       |

2. Perform logarithmic transformation and fill blanks with zeros. In Microsoft excel this transformation can be achieved by the equation `=if(VALUE_A>0;log10(VALUE_A);0)`. Non-logarithmized values are not needed for further calculations.

3. Load logarithmized table into R, for example by using the R package `readxl`. The "PATH TO EXCEL FILE" has to be given dependent on the position of the used data file. For example: "C:\Users\USER\Desktop\Data.xlsx". Generate a `DATA` object of the file. Omit the marker proteins name column and use the first row as names.

```
> library(readxl)
> DATA <- read_excel("PATH TO EXCEL FILE", skip = 1)
```

4. Load the `spatialEco` package, perform cosine similarity index calculations and write data to a new file. The file will be saved at the designated R workspace, usually the documents folder on a Microsoft Windows system.

```
> library(spatialEco)
> write.table(csi(as.matrix(DATA)), "new_file.csv")
```

5. Import `new_file.csv` to excel. The file will contain two types of similarity values, cosine similarity (left) and angular similarity (right). Delete the angular similarity to obtain a cosine similarity matrix. In some instances, the first row containing the compound names, is shifted one field to the left. This needs to be corrected before deleting the angular similarities.

|            | compound A | compound B |
|------------|------------|------------|
| compound A | 1.00       | 0.52       |
| compound B | 0.52       | 1.00       |

## References

1. Zhu B. & Stülke J. SubtiWiki in 2018. From genes and proteins to functional network annotation of the model organism *Bacillus subtilis*. *Nucleic Acids Research* **46**, D743–D748 (2018).
2. Bandow J. E., Brötz H., Leichert L. I. O., Labischinski H. & Hecker M. Proteomic approach to understanding antibiotic action. *Antimicrob Agents Chemother* **47**, 948–955 (2003).
3. Bandow J. E. et al. The role of peptide deformylase in protein biosynthesis: A proteomic study. *Proteomics* **3**, 299–306 (2003).
4. Brötz-Oesterhelt H. et al. Dysregulation of bacterial proteolytic machinery by a new class of antibiotics. *Nat Med* **11**, 1082–1087 (2005).
5. Eymann C. et al. A comprehensive proteome map of growing *Bacillus subtilis* cells. *Proteomics* **4**, 2849–2876 (2004).
6. Hernandez V. et al. Discovery of a novel class of boron-based antibacterials with activity against gram-negative bacteria. *Antimicrob Agents Chemother* **57**, 1394–1403 (2013).
7. Rasmussen B. et al. Molecular basis of tetracycline action: identification of analogs whose primary target is not the bacterial ribosome. *Antimicrob Agents Chemother* **35**, 2306–2311 (1991).
8. Shen S. Li X-F., Cullen W. R., Weinfeld M. & Le X. C. Arsenic binding to proteins. *Chemical Reviews* **113**, 7769–7792 (2013).
9. Blanchet M. et al. Claramines: a new class of broad-spectrum antimicrobial agents with bimodal activity. *ChemMedChem* **13**, 1018–1027 (2018).
10. Harbut M. B. et al. Auranofin exerts broad-spectrum bactericidal activities by targeting thiol-redox homeostasis. *Proc. Natl. Acad. Sci. USA* **112**, 4453–4458 (2015).
11. Park J-W. et al. Effect of carbonyl cyanide m-chlorophenylhydrazone (CCCP) on the dimerization of lipoprotein lipase. *Biochim Biophys Acta* **1344**, 132–138 (1997).
12. Woronowicz K., Olubanjo O. B., Sha D., Kay J. M. & Niederman R. A. (2015) Effects of the protonophore carbonyl-cyanide m-chlorophenylhydrazone on intracytoplasmic membrane assembly in *Rhodobacter sphaeroides*. *Biochim Biophys Acta* **1847**, 1119–1128
13. Shen S. et al. Effects of cinnamaldehyde on *Escherichia coli* and *Staphylococcus aureus* membrane. *Food Control* **47**, 196–202 (2015).
14. Domadia P., Swarup S., Bhunia A., Sivaraman J. & Dasgupta D. Inhibition of bacterial cell division protein FtsZ by cinnamaldehyde. *Biochemical Pharmacology* **74**, 831–840 (2007).
15. Autelitano A., Minassi A., Pagani A., Tagliatalata-Scafati O. & Appendino G. The reaction of cinnamaldehyde and cinnam(o)yl derivatives with thiols. *Acta Pharm Sin B* **7**, 523–526 (2017).
16. LeBel M. Ciprofloxacin: chemistry, mechanism of action, resistance, antimicrobial spectrum, pharmacokinetics, clinical trials, and adverse reactions. *Pharmacotherapy* **8**, 3–33 (1988).
17. Drlica K. & Zhao X. DNA gyrase, topoisomerase IV, and the 4-quinolones. *Microbiol Mol Biol Rev* **61**, 377–392 (1997).
18. Pommier Y., Leo E. & Zhang H. Marchand C DNA topoisomerases and their poisoning by anticancer and antibacterial drugs. *Chem Biol* **17**, 421–433 (2010).
19. Chiriac A. I. et al. Mode of action of closthioamide: the first member of the polythioamide class of bacterial DNA gyrase inhibitors. *J Antimicrob Chemother* **70**, 2576–2588 (2015).
20. Soufo H. J. D. et al. Bacterial translation elongation factor EF-Tu interacts and colocalizes with actin-like MreB protein. *Proc. Natl. Acad. Sci. USA* **107**, 3163–3168 (2010).
21. Clough J. et al. Combinatorial modification of natural products: synthesis and in vitro analysis of derivatives of thiazole peptide antibiotic GE2270A: A-ring modifications. *Bioorg Med Chem Let* **13**:3409–3414 (2003).
22. Parmeggiani A. & Swart G. W. Mechanism of action of kirromycin-like antibiotics. *Annu Rev Microbiol* **39**, 557–577(1985).
23. Parmeggiani A. & Nissen P. Elongation factor Tu-targeted antibiotics: four different structures, two mechanisms of action. *FEBS letters* **580**, 4576–4581 (2006).
24. Cappellano C., Monti F., Sosio M., Donadio S. & Sarubbi E. Natural kirromycin resistance of elongation factor Tu from the kirrothricin producer *Streptomyces cinnamoneus*. *Microbiology (Reading, England)* **143**, 617–624 (1997).
25. Ramadoss N. S. et al. Small molecule inhibitors of trans-translation have broad-spectrum antibiotic activity. *Proc. Natl. Acad. Sci. USA* **110**, 10282–10287 (2013).
26. Swaney S. M., Aoki H., Ganoza M. C. & Shinabarger D. L. The oxazolidinone linezolid inhibits initiation of protein synthesis in bacteria. *Antimicrob Agents Chemother* **42**, 3251–3255 (1998).
27. Wilson D. N. et al. The oxazolidinone antibiotics perturb the ribosomal peptidyl-transferase center and effect tRNA positioning. *Proc. Natl. Acad. Sci. USA* **105**. 13339–13344 (2008).
28. Huczyński A., Janczak J., Lowicki D. & Brzezinski B. Monensin A acid complexes as a model of electrogenic transport of sodium cation. *Biochim Biophys Acta* **1818**, 2108–2119 (2012).
29. Aowicki D. & Huczyński A. Structure and antimicrobial properties of monensin A and its derivatives: summary of the achievements. *BioMed* **2013**, 742149 (2013).
30. Parenti M. A., Hatfield S. M. & Leyden J. J. Mupirocin: a topical antibiotic with a unique structure and mechanism of action. *Clinical Pharmacy* **6**, 761–770 (1987).
31. Hughes J. & Mellows G. On the mode of action of pseudomonic acid: inhibition of protein synthesis in *Staphylococcus aureus*. *J Antibiot (Tokyo)* **31**, 330–335 (1978).

32. Sugino A., Peebles C. L., Kreuzer K. N. & Cozzarelli N. R. Mechanism of action of nalidixic acid: purification of *Escherichia coli* nalA gene product and its relationship to DNA gyrase and a novel nicking-closing enzyme. *Proc Natl Acad Sci USA* **74**, 4767-4771 (1977).
33. Naidu B. N. et al. Synthesis and antibacterial activity of nocathiacin I analogues. *Bioorg Med Chem Lett* **16**, 3545–3549 (2006).
34. Alhanout K. et al. New insights into the antibacterial mechanism of action of squalamine. *J Antimicrob Chemother* **65**, 1688–1693 (2010).
35. Eyal Z. et al. Structural insights into species-specific features of the ribosome from the pathogen *Staphylococcus aureus*. *Proc. Natl. Acad. Sci. USA* **112**, E5805-814 (2015)
36. Scheinfeld N. Telithromycin: a brief review of a new ketolide antibiotic. *J Drugs Dermatol* **3**, 409–413 (2004).
37. Hancock I. C., Wiseman G. & Baddiley J. Biosynthesis of the unit that links teichoic acid to the bacterial wall: inhibition by tunicamycin. *FEBS letters* **69**, 75–80 (1976).
38. Ward J. B. Tunicamycin inhibition of bacterial wall polymer synthesis. *FEBS letters* **78**, 151–154 (1977).
39. Ward J. B., Wyke A. W. & Curtis C. A. The effect of tunicamycin on wall-polymer synthesis in Bacilli. *Biochem Soc Trans* **8**, 164–166 (1980).
40. Haydon D. J. et al. An inhibitor of FtsZ with potent and selective anti-staphylococcal activity. *Science* **321**, 1673–1675 (2008).
41. Fisher J. F., Meroueh S. O. & Mobashery S. Bacterial resistance to beta-lactam antibiotics: compelling opportunism, compelling opportunity. *Chemical Reviews* **105**, 395–424 (2005).
42. Drawz S. M. & Bonomo R. A. Three decades of beta-lactamase inhibitors. *Clin Microbiol Rev* **23**, 160–201 (2010).
43. Passmore J. B., Pinho S., Gomez-Lazaro M. & Schrader M. The respiratory chain inhibitor rotenone affects peroxisomal dynamics via its microtubule-destabilising activity. *Histochem Cell Biol* **148**, 331–341 (2017).
44. Baxter A. L. & McKillen M. N. The energization of D-gluconate transport in *Bacillus subtilis*. *Biochem Soc Trans* **4**, 884–886 (1976).
45. Salzberg L. I., et al. The *Bacillus subtilis* GntR family repressor YtrA responds to cell wall antibiotics. *J Bacteriol* **193**, 5793-5801 (2011).
